# Supplementary material for: Protobranching as repulsion-induced attraction: a prototype for geminal stabilization
Source: Royal Society of Chemistry journal article supplement (doi:10.1039/d0cp02193h), 2020-01-01
Supplement: d0cp02193h1.pdf [file d0cp02193h1.pdf]

## Protobranching as Repulsion-Induced Attraction: A Prototype for Geminal Stabilization

Justin P. Joyce<sup>a</sup>, Matthew P. Shores<sup>b</sup>, Anthony K. Rappè<sup>a\*</sup>

<sup>a</sup> Department of Chemistry, Colorado State University, Fort Collins, CO, 80523-1872, USA, E-mail:  
anthony.rappe@colostate.edu

### Contents

|                                                                                                                                                      |     |
|------------------------------------------------------------------------------------------------------------------------------------------------------|-----|
| I. Potential curve of model diatomics .....                                                                                                          | 2   |
| II. Exponential fits of $\rho$ parameters and LED terms .....                                                                                        | 3   |
| III. Impact of MP2-derived singlet and triplet correlation on electron density. ....                                                                 | 4   |
| IV. Functional form of $Ar_2$ for the B3LYP-D3, B3LYP-D3M, $D3(^3Ar_2)$ , and $D3(Ar_2)$ empirical dispersion corrections. ....                      | 4   |
| V. Gaussian16 and ORCA 4.1 syntax for the $D3(^3Ar_2)$ and $D3(Ar_2)$ empirical dispersion correction .....                                          | 5   |
| VI. Cartesian coordinates of the eighteen isomers of octane and the sixteen <i>gauche</i> -conformations of <i>n</i> -octane.....                    | 7   |
| VII. Linear fits of the $\Delta ZPE$ terms of the eighteen isomers of octane and the sixteen <i>gauche</i> -conformations of <i>n</i> -octane, ..... | 109 |
| VIII. Performance of assorted functionals for the calculation of the $\Delta\Delta_f H^\circ$ of the eighteen isomers of octane. ....                | 109 |

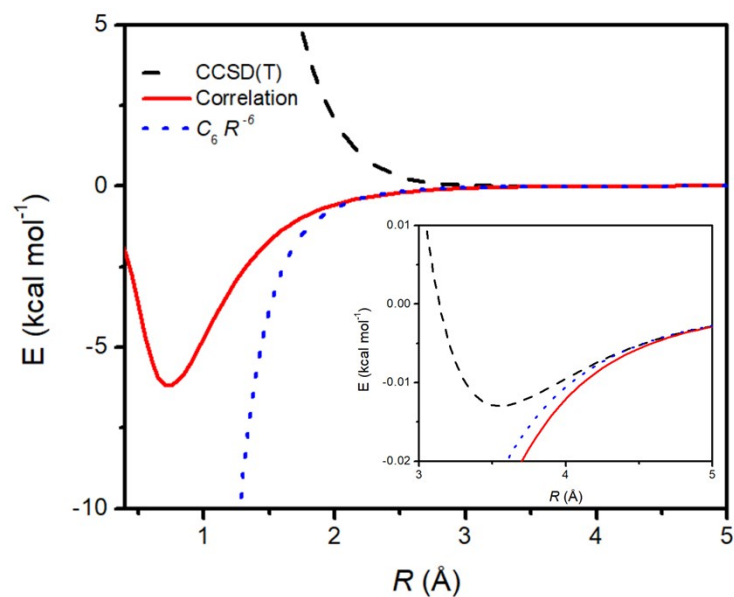

**Figure S1.** The CCSD(T)/aug-cc-pV5z energy of  ${}^2\text{HHe}$  (dashed black line) as a function of distance. The solid red line is the associated correlation energy while the dotted blue line presents the atom-pairwise dipole-dipole term ( $C_6 = -43.3$  kcal mol $^{-1}$  Å $^6$ ). The correlation energy displays a minimum of -6.18 kcal mol $^{-1}$  at 0.75 Å. The equilibrium separation is included in the inset ( $R_{\text{eq}} = 3.55$  Å,  $D_0 = 0.013$  kcal mol $^{-1}$ ).

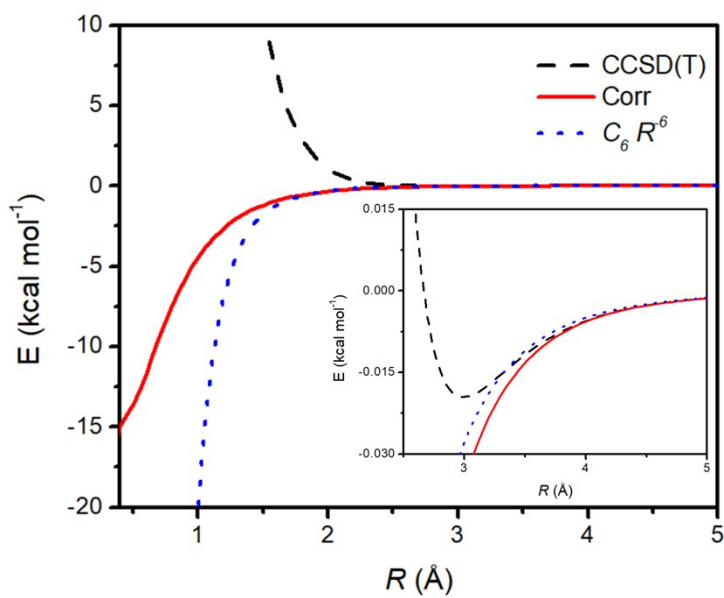

**Figure S2.** The CCSD(T) energy of  ${}^2\text{He}_2$  (dashed black line) as a function of distance ( $R_{\text{eq}} = 3.00$  Å,  $D_0 = -0.020$  kcal mol $^{-1}$ ). The solid red line is the associated correlation energy while the dotted blue line presents the atom-pairwise dipole-dipole term ( $C_6 = -20.3$  kcal mol $^{-1}$  Å $^6$ ). The equilibrium separation is included in the inset.

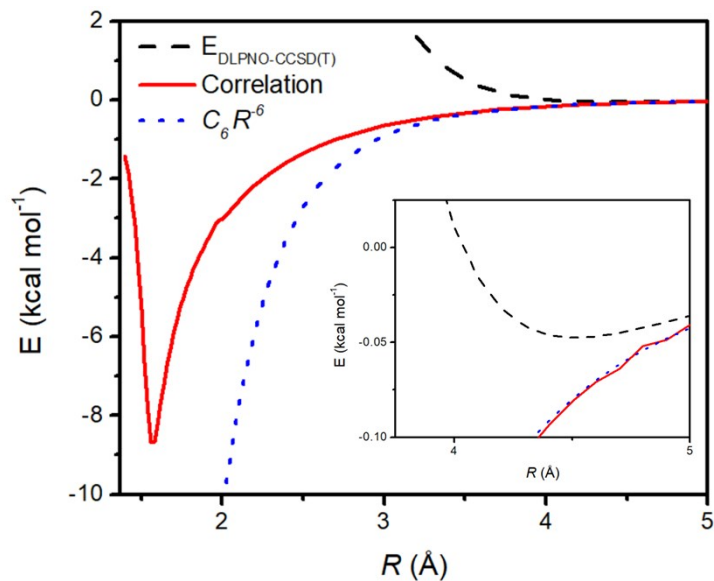

**Figure S3.** CCSD(T) energy of  ${}^9\text{C}_2$  (dashed black line) as a function of distance ( $R_{\text{eq}} = 4.50 \text{ \AA}$ ,  $D_0 = -0.048 \text{ kcal mol}^{-1}$ ). The equilibrium separation is included in the inset. The solid red line is the associated correlation energy while the dotted blue line presents the atom-pairwise dipole-dipole term ( $C_6 = -664.0 \text{ kcal mol}^{-1} \text{ \AA}^6$ ). The correlation energy displays a minimum of  $-8.68 \text{ kcal mol}^{-1}$  at  $1.56 \text{ \AA}$

#### I. Exponential Fits of Argon Dimer

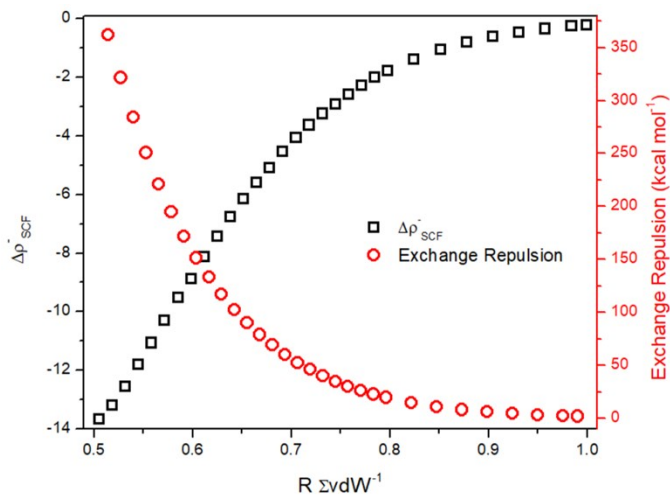

**Figure S4.** The variation of  $\Delta p_{\text{SCF}}$  (black) and exchange repulsion (red) with respect to internuclear separation for  $\text{Ar}_2$ .

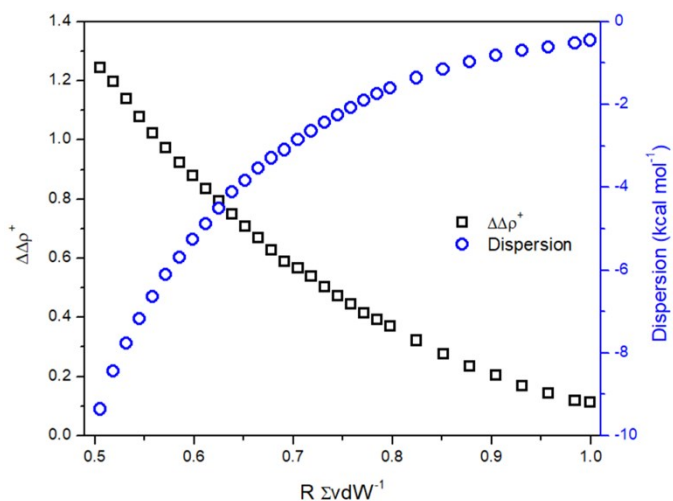

**Figure S5.** The variation of  $\Delta\Delta p^+$  (black) and exchange repulsion (red) with respect to the internuclear separation for  $\text{Ar}_2$ .

Figure 4.

$$\text{Exchange Repulsion} = 71.266 e^{-\left(\frac{\Delta p_{\text{SCF}}^-}{0.876}\right)} - 67.561 \quad R^2 = 0.998$$

Figure 5.

$$\text{Dispersion} = -3.770 \Delta\Delta p^+ + 2.792 \quad R^2 = 0.999$$

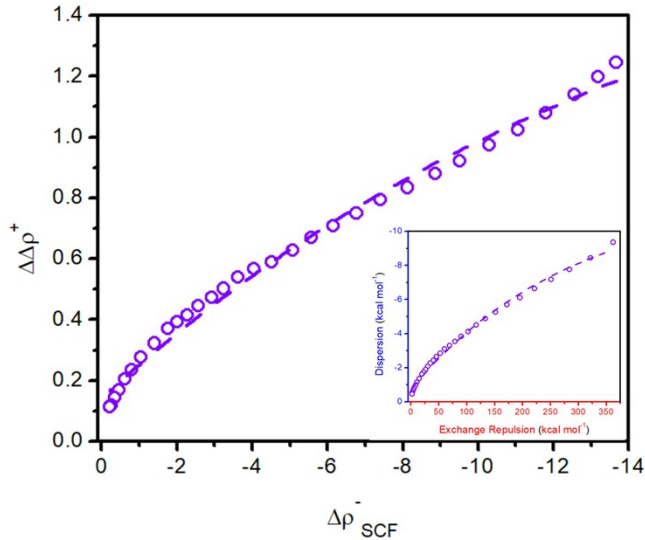

**Figure S6.** The relationship between  $\Delta\Delta p^+$  and  $\Delta p_{\text{SCF}}^-$  where the purple dashed line is an exponential fit. The inset depicts the exponential relationship between Dispersion and Exchange Repulsion as calculated with LED. The exponential fits are provided below:

$$\Delta\Delta p^+ = -0.018 e^{\left(\frac{\Delta p_{\text{SCF}}^-}{0.160}\right)} + 0.019 \quad R^2 = 0.991$$

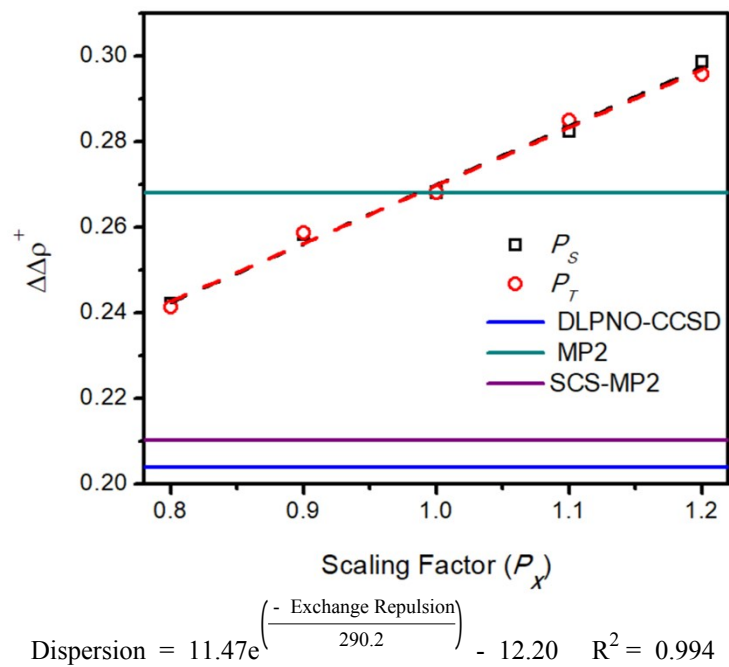

### III. Impact of MP2-derived singlet and triplet correlation on electron density

**Figure S7.** The relationship of the  $\Delta\Delta\rho^+$  term, in terms of the specified MP2 electron density, with respect to the singlet (black) and triplet (red) correlation scaling factors at the  $\text{Ar}_2$  at a separation of  $0.90 \text{ \AA}$ . The solid blue, purple, and cyan lines present the  $\Delta\Delta\rho^+$  values at its geometry for DLPNO-CCSD, SCS-MP2, and MP2, respectively. The overlapping dashed black and red lines are the respective linear fits for the singlet ( $P_S$ ) and triplet ( $P_T$ ) scaling factors.

IV. Functional forms of B3LYP-D3, B3LYP-D3M, and D3(Ar<sub>2</sub>) for Ar<sub>2</sub>:

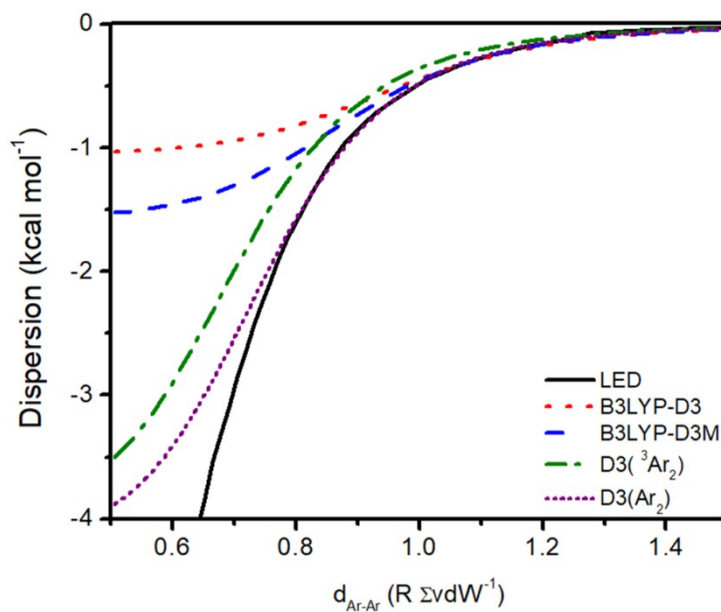

Figure S8. The potential of the specified empirical dispersion correction for Ar<sub>2</sub> ( $C_6 = -890.8 \text{ kcal mol}^{-1} \text{ \AA}^6$ ,  $C_8 = -8890.4 \text{ kcal mol}^{-1} \text{ \AA}^8$ )

V.

Gaussian16 and ORCA 4.1 syntax for the D3(<sup>3</sup>Ar<sub>2</sub>) correction.

Gaussian:

```
# b3lyp/aug-cc-pVQZ          iop(3/174=1000000,3/175=03505000,3/177=00610000,3/178=4634550)
empiricaldispersion=gd3bj
```

ORCA:

```
! d3bj b3lyp aug-cc-pVQZ aug-cc-pVQZ/C RIJK aug-cc-pVQZ/JK TightSCF
%method
D3S6=1.00000
D3S8=0.35050
D3A1=0.06010
D3A2=4.63455
End
```

## Gaussian16 and ORCA 4.1 syntax for the D3(Ar<sub>2</sub>) correction.

Gaussian:

```
# b3lyp/aug-cc-pVQZ iop(3/174=1000000,3/175=0998380,3/177=0110190,3/178=4645400) empiricaldispersion=gd3bj
```

ORCA:

```
! d3bj b3lyp aug-cc-pVQZ aug-cc-pVQZ/C RIJK aug-cc-pVQZ/JK TightSCF
%method
D3S6=1.00000
D3S8=0.99838
D3A1=0.11019
D3A2=4.64540
End
```

VI. Cartesian coordinates of the eighteen isomers of octane and associated low-lying *gauche*-conformations. The *gauche* conformations are denoted by the associated C-C bonds. 1, 2, 3, 4, and 5 refer to a *gauche*-conformation (g) relative to the alkyl substituents along the C<sub>2</sub>-C<sub>3</sub>, C<sub>3</sub>-C<sub>4</sub>, C<sub>5</sub>-C<sub>6</sub>, C<sub>6</sub>-C<sub>7</sub>, and C<sub>7</sub>-C<sub>8</sub> bond, respectively for the longest chain within the configuration.

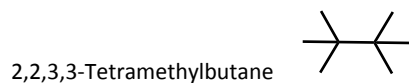

|   |           |           |           |
|---|-----------|-----------|-----------|
| C | 0.779000  | 0.000000  | -0.000000 |
| C | -0.779000 | -0.000000 | -0.000000 |
| C | 1.326000  | 1.413000  | -0.161000 |
| H | 0.907000  | 2.100000  | 0.577000  |
| H | 2.410000  | 1.404000  | -0.024000 |
| H | 1.122000  | 1.813000  | -1.155000 |
| C | 1.327000  | -0.567000 | 1.304000  |
| H | 0.908000  | -1.549000 | 1.530000  |
| H | 2.411000  | -0.680000 | 1.227000  |
| H | 1.123000  | 0.094000  | 2.148000  |
| C | 1.327000  | -0.846000 | -1.143000 |
| H | 2.411000  | -0.723000 | -1.203000 |
| H | 1.123000  | -1.907000 | -0.993000 |
| H | 0.908000  | -0.550000 | -2.107000 |
| C | -1.326000 | -1.413000 | -0.161000 |
| H | -2.410000 | -1.404000 | -0.024000 |
| H | -1.122000 | -1.813000 | -1.155000 |
| H | -0.907000 | -2.100000 | 0.577000  |
| C | -1.327000 | 0.846000  | -1.143000 |
| H | -2.411000 | 0.723000  | -1.203000 |
| H | -1.123000 | 1.907000  | -0.993000 |
| H | -0.908000 | 0.550000  | -2.107000 |
| C | -1.327000 | 0.567000  | 1.304000  |

|   |           |           |          |
|---|-----------|-----------|----------|
| H | -2.411000 | 0.680000  | 1.227000 |
| H | -1.123000 | -0.094000 | 2.148000 |
| H | -0.908000 | 1.549000  | 1.530000 |

Total Energy: -315.607899340

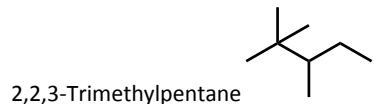

|   |           |           |           |
|---|-----------|-----------|-----------|
| C | 2.004000  | 0.819000  | -0.622000 |
| H | 1.790000  | 1.009000  | -1.677000 |
| H | 1.993000  | 1.774000  | -0.094000 |
| H | 3.016000  | 0.413000  | -0.552000 |
| C | 1.004000  | -0.164000 | -0.031000 |
| C | -0.437000 | 0.313000  | -0.310000 |
| H | -0.588000 | 0.194000  | -1.391000 |
| C | -1.490000 | -0.536000 | 0.394000  |
| H | -1.550000 | -0.228000 | 1.443000  |
| H | -1.184000 | -1.585000 | 0.402000  |
| C | -2.862000 | -0.438000 | -0.246000 |
| H | -2.829000 | -0.787000 | -1.282000 |
| H | -3.594000 | -1.046000 | 0.288000  |
| H | -3.233000 | 0.588000  | -0.256000 |
| C | 1.233000  | -1.513000 | -0.700000 |
| H | 0.561000  | -2.282000 | -0.318000 |
| H | 1.084000  | -1.438000 | -1.780000 |
| H | 2.256000  | -1.853000 | -0.523000 |
| C | 1.266000  | -0.298000 | 1.462000  |
| H | 2.308000  | -0.580000 | 1.634000  |
| H | 1.086000  | 0.642000  | 1.987000  |
| H | 0.634000  | -1.066000 | 1.911000  |
| C | -0.651000 | 1.779000  | 0.027000  |
| H | -1.698000 | 2.056000  | -0.105000 |
| H | -0.389000 | 1.982000  | 1.069000  |
| H | -0.058000 | 2.439000  | -0.605000 |

Total Energy: -315.606690155



1g

|   |           |           |           |
|---|-----------|-----------|-----------|
| C | 0.578000  | -1.659000 | -0.766000 |
| H | -0.393000 | -2.114000 | -0.594000 |
| H | 0.682000  | -1.481000 | -1.840000 |
| H | 1.343000  | -2.383000 | -0.473000 |
| C | 0.769000  | -0.360000 | 0.008000  |
| C | -0.272000 | 0.698000  | -0.429000 |
| H | -0.363000 | 0.608000  | -1.520000 |
| C | -1.671000 | 0.537000  | 0.165000  |
| H | -2.265000 | 1.374000  | -0.214000 |
| H | -1.611000 | 0.691000  | 1.247000  |
| C | -2.433000 | -0.744000 | -0.122000 |
| H | -2.039000 | -1.596000 | 0.431000  |
| H | -3.481000 | -0.630000 | 0.166000  |
| H | -2.405000 | -0.993000 | -1.185000 |
| C | 0.678000  | -0.639000 | 1.501000  |
| H | 0.774000  | 0.281000  | 2.083000  |
| H | -0.269000 | -1.112000 | 1.767000  |
| H | 1.483000  | -1.310000 | 1.806000  |
| C | 2.180000  | 0.126000  | -0.305000 |
| H | 2.895000  | -0.679000 | -0.123000 |
| H | 2.269000  | 0.424000  | -1.353000 |
| H | 2.469000  | 0.974000  | 0.317000  |
| C | 0.181000  | 2.119000  | -0.121000 |
| H | -0.603000 | 2.831000  | -0.388000 |
| H | 0.381000  | 2.242000  | 0.947000  |
| H | 1.081000  | 2.398000  | -0.666000 |

Total Energy: -315.602673697

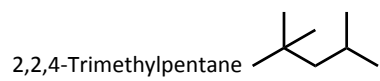

|   |           |           |           |
|---|-----------|-----------|-----------|
| C | -2.261000 | -0.196000 | 1.067000  |
| H | -2.225000 | -1.197000 | 1.505000  |
| H | -2.132000 | 0.530000  | 1.873000  |
| H | -3.254000 | -0.051000 | 0.635000  |
| C | -1.180000 | -0.030000 | 0.010000  |
| C | 0.174000  | -0.297000 | 0.669000  |
| H | 0.248000  | 0.313000  | 1.577000  |
| H | 0.166000  | -1.339000 | 1.005000  |
| C | 1.417000  | -0.053000 | -0.189000 |
| H | 1.127000  | -0.107000 | -1.243000 |
| C | 2.018000  | 1.319000  | 0.066000  |
| H | 2.371000  | 1.386000  | 1.099000  |
| H | 2.873000  | 1.503000  | -0.590000 |
| H | 1.293000  | 2.118000  | -0.090000 |
| C | -1.425000 | -1.038000 | -1.102000 |
| H | -0.671000 | -0.963000 | -1.889000 |
| H | -1.405000 | -2.058000 | -0.711000 |
| H | -2.402000 | -0.871000 | -1.562000 |
| C | -1.259000 | 1.377000  | -0.560000 |
|   |           |           |           |
| H | -2.249000 | 1.558000  | -0.984000 |
| H | -1.083000 | 2.126000  | 0.216000  |
| H | -0.524000 | 1.529000  | -1.353000 |
| C | 2.461000  | -1.127000 | 0.059000  |
| H | 2.755000  | -1.134000 | 1.113000  |
| H | 2.075000  | -2.119000 | -0.186000 |
| H | 3.361000  | -0.953000 | -0.536000 |

Total Energy: -315.606211537

1g

|   |           |           |           |
|---|-----------|-----------|-----------|
| C | -2.224000 | -1.097000 | -0.354000 |
| H | -2.148000 | -1.393000 | -1.403000 |
| H | -2.110000 | -1.994000 | 0.260000  |
| H | -3.226000 | -0.695000 | -0.187000 |
| C | -1.161000 | -0.061000 | -0.008000 |
| C | 0.204000  | -0.676000 | -0.343000 |
| H | 0.164000  | -1.732000 | -0.054000 |
| H | 0.326000  | -0.670000 | -1.434000 |
| C | 1.463000  | -0.098000 | 0.289000  |
| H | 1.356000  | -0.161000 | 1.377000  |
| C | 2.650000  | -0.960000 | -0.110000 |
| H | 2.804000  | -0.918000 | -1.192000 |
| H | 3.568000  | -0.616000 | 0.371000  |
| H | 2.492000  | -2.006000 | 0.163000  |
| C | -1.447000 | 1.185000  | -0.835000 |
| H | -0.748000 | 1.993000  | -0.627000 |
| H | -1.390000 | 0.957000  | -1.903000 |
| H | -2.455000 | 1.552000  | -0.625000 |
| C | -1.262000 | 0.268000  | 1.473000  |
| H | -2.271000 | 0.608000  | 1.718000  |
| H | -1.046000 | -0.612000 | 2.084000  |
| H | -0.565000 | 1.057000  | 1.758000  |
| C | 1.741000  | 1.350000  | -0.076000 |
| H | 1.723000  | 1.485000  | -1.161000 |
| H | 1.013000  | 2.034000  | 0.360000  |
| H | 2.729000  | 1.650000  | 0.282000  |

Total Energy: -315.605796754

2g

|   |           |           |           |
|---|-----------|-----------|-----------|
| C | -2.308000 | -0.620000 | -0.662000 |
| H | -2.494000 | -0.137000 | -1.625000 |
| H | -2.177000 | -1.690000 | -0.840000 |
| H | -3.194000 | -0.485000 | -0.038000 |
| C | -1.077000 | -0.026000 | 0.014000  |
| C | 0.086000  | -0.188000 | -0.975000 |
| H | 0.014000  | -1.195000 | -1.400000 |
| H | -0.120000 | 0.498000  | -1.805000 |
| C | 1.548000  | 0.005000  | -0.562000 |
| H | 2.091000  | 0.047000  | -1.515000 |
| C | 1.848000  | 1.305000  | 0.164000  |
| H | 1.438000  | 1.299000  | 1.176000  |
| H | 2.927000  | 1.446000  | 0.253000  |
| H | 1.436000  | 2.168000  | -0.363000 |
| C | -1.375000 | 1.440000  | 0.303000  |
| H | -0.568000 | 1.928000  | 0.846000  |
| H | -1.542000 | 1.991000  | -0.626000 |
| H | -2.282000 | 1.523000  | 0.909000  |
| C | -0.852000 | -0.760000 | 1.326000  |
| H | -1.760000 | -0.723000 | 1.933000  |
| H | -0.602000 | -1.809000 | 1.155000  |
| H | -0.048000 | -0.308000 | 1.908000  |
| C | 2.131000  | -1.175000 | 0.200000  |
| H | 1.737000  | -1.244000 | 1.213000  |
| H | 1.916000  | -2.118000 | -0.308000 |
| H | 3.217000  | -1.076000 | 0.276000  |

Total Energy: -315.588944735

3g

|   |           |           |           |
|---|-----------|-----------|-----------|
| C | 2.261000  | 0.196000  | 1.067000  |
| H | 2.225000  | 1.197000  | 1.505000  |
| H | 2.131000  | -0.530000 | 1.873000  |
| H | 3.254000  | 0.051000  | 0.635000  |
| C | 1.180000  | 0.030000  | 0.010000  |
| C | -0.174000 | 0.297000  | 0.669000  |
| H | -0.248000 | -0.312000 | 1.577000  |
| H | -0.166000 | 1.339000  | 1.005000  |
| C | -1.417000 | 0.053000  | -0.189000 |
| H | -1.127000 | 0.107000  | -1.244000 |
| C | -2.018000 | -1.319000 | 0.066000  |
| H | -2.371000 | -1.386000 | 1.099000  |
| H | -2.873000 | -1.503000 | -0.590000 |
| H | -1.293000 | -2.118000 | -0.090000 |
| C | 1.425000  | 1.038000  | -1.102000 |
| H | 0.672000  | 0.963000  | -1.889000 |
| H | 1.405000  | 2.058000  | -0.711000 |
| H | 2.402000  | 0.871000  | -1.562000 |
| C | 1.259000  | -1.377000 | -0.560000 |
| H | 2.249000  | -1.557000 | -0.985000 |
| H | 1.083000  | -2.126000 | 0.217000  |
| H | 0.524000  | -1.529000 | -1.353000 |
| C | -2.461000 | 1.127000  | 0.059000  |
| H | -2.755000 | 1.134000  | 1.113000  |
| H | -2.075000 | 2.119000  | -0.186000 |
| H | -3.361000 | 0.953000  | -0.536000 |

Total Energy: -315.603237992

2,3,3-Trimethylpentane

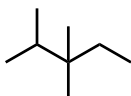

|   |           |           |           |
|---|-----------|-----------|-----------|
| C | 2.299000  | -0.722000 | -0.111000 |
| H | 2.500000  | -0.693000 | 0.963000  |
| H | 2.096000  | -1.756000 | -0.388000 |
| H | 3.216000  | -0.418000 | -0.620000 |
| C | 1.163000  | 0.220000  | -0.475000 |
| H | 1.084000  | 0.245000  | -1.569000 |
| C | -0.216000 | -0.258000 | 0.030000  |
| C | -1.251000 | 0.834000  | -0.260000 |
| H | -1.096000 | 1.189000  | -1.285000 |
| H | -1.048000 | 1.686000  | 0.394000  |
| C | -2.704000 | 0.429000  | -0.093000 |
| H | -2.899000 | 0.018000  | 0.900000  |
| H | -3.357000 | 1.295000  | -0.220000 |
| H | -3.005000 | -0.318000 | -0.828000 |
| C | 1.530000  | 1.622000  | -0.012000 |
| H | 0.845000  | 2.380000  | -0.389000 |
| H | 1.542000  | 1.686000  | 1.079000  |
| H | 2.533000  | 1.878000  | -0.362000 |
| C | -0.181000 | -0.552000 | 1.522000  |
| H | 0.156000  | 0.315000  | 2.093000  |
| H | -1.174000 | -0.822000 | 1.885000  |
| H | 0.484000  | -1.387000 | 1.745000  |
| C | -0.602000 | -1.528000 | -0.715000 |
| H | -0.711000 | -1.332000 | -1.786000 |
| H | 0.148000  | -2.309000 | -0.588000 |
| H | -1.548000 | -1.926000 | -0.346000 |

Total Energy: -315.605865048

2,3,4-Trimethylpentane

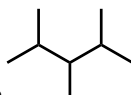

|   |           |           |           |
|---|-----------|-----------|-----------|
| C | -1.520000 | -1.588000 | -0.380000 |
| H | -1.524000 | -1.534000 | -1.473000 |
| H | -0.750000 | -2.299000 | -0.082000 |
| H | -2.485000 | -1.992000 | -0.065000 |
| C | -1.302000 | -0.209000 | 0.219000  |
| H | -1.197000 | -0.318000 | 1.305000  |
| C | -0.029000 | 0.462000  | -0.306000 |
| H | -0.198000 | 0.661000  | -1.374000 |
| C | 1.201000  | -0.450000 | -0.230000 |
| H | 0.963000  | -1.347000 | -0.808000 |
| C | 2.418000  | 0.181000  | -0.886000 |
| H | 2.811000  | 1.008000  | -0.290000 |
| H | 3.219000  | -0.553000 | -0.991000 |
| H | 2.178000  | 0.566000  | -1.880000 |
| C | -2.529000 | 0.650000  | -0.044000 |
| H | -2.480000 | 1.612000  | 0.464000  |
| H | -2.637000 | 0.839000  | -1.117000 |
| H | -3.434000 | 0.142000  | 0.295000  |
| C | 0.207000  | 1.796000  | 0.384000  |
| H | -0.598000 | 2.500000  | 0.175000  |
| H | 0.263000  | 1.671000  | 1.468000  |
| H | 1.135000  | 2.261000  | 0.051000  |
| C | 1.532000  | -0.883000 | 1.187000  |
| H | 1.780000  | -0.021000 | 1.811000  |
| H | 0.701000  | -1.411000 | 1.658000  |
| H | 2.397000  | -1.550000 | 1.191000  |

Total Energy: -315.605131312

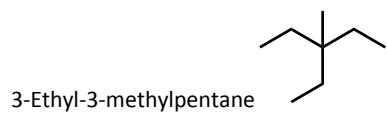

|   |           |           |           |
|---|-----------|-----------|-----------|
| C | 0.209000  | 0.231000  | 2.571000  |
| H | -0.649000 | -0.435000 | 2.675000  |
| H | 1.112000  | -0.365000 | 2.717000  |
| H | 0.161000  | 0.956000  | 3.386000  |
| C | 0.209000  | 0.936000  | 1.229000  |
| H | -0.713000 | 1.517000  | 1.131000  |
| H | 1.026000  | 1.666000  | 1.201000  |
| C | 0.352000  | 0.035000  | -0.000000 |
| C | 0.209000  | 0.936000  | -1.229000 |
| H | 1.026000  | 1.666000  | -1.201000 |
| H | -0.713000 | 1.517000  | -1.131000 |
| C | 0.209000  | 0.231000  | -2.571000 |
| H | -0.649000 | -0.435000 | -2.675000 |
| H | 0.161000  | 0.956000  | -3.386000 |
| H | 1.112000  | -0.365000 | -2.717000 |
| C | -0.699000 | -1.073000 | -0.000000 |
| H | -0.526000 | -1.712000 | 0.871000  |
| H | -0.526000 | -1.712000 | -0.871000 |
| C | 1.728000  | -0.614000 | -0.000000 |
| H | 1.865000  | -1.247000 | -0.878000 |
| H | 2.515000  | 0.144000  | -0.000000 |
| H | 1.865000  | -1.247000 | 0.878000  |
| C | -2.138000 | -0.596000 | 0.000000  |
| H | -2.828000 | -1.441000 | 0.000000  |
| H | -2.359000 | 0.010000  | 0.881000  |
| H | -2.359000 | 0.010000  | -0.881000 |

Total Energy: -315.605552923



1g

|   |           |           |           |
|---|-----------|-----------|-----------|
| C | -1.598000 | 1.741000  | -0.469000 |
| H | -2.458000 | 1.082000  | -0.335000 |
| H | -1.483000 | 2.326000  | 0.446000  |
| H | -1.841000 | 2.438000  | -1.274000 |
| C | -0.338000 | 0.963000  | -0.795000 |
| H | -0.492000 | 0.395000  | -1.718000 |
| H | 0.468000  | 1.670000  | -1.008000 |
| C | 0.139000  | 0.005000  | 0.297000  |
| C | 1.312000  | -0.825000 | -0.230000 |
| H | 0.972000  | -1.398000 | -1.097000 |
| H | 1.576000  | -1.560000 | 0.539000  |
| C | 2.555000  | -0.047000 | -0.619000 |
| H | 2.967000  | 0.507000  | 0.226000  |
| H | 3.332000  | -0.724000 | -0.977000 |
| H | 2.351000  | 0.667000  | -1.420000 |
| C | -0.983000 | -0.943000 | 0.728000  |
| H | -1.756000 | -0.357000 | 1.232000  |
| H | -0.575000 | -1.617000 | 1.489000  |
| C | 0.577000  | 0.788000  | 1.526000  |
| H | 1.015000  | 0.117000  | 2.270000  |
| H | 1.319000  | 1.548000  | 1.277000  |
| H | -0.271000 | 1.290000  | 1.995000  |
| C | -1.621000 | -1.759000 | -0.379000 |
| H | -2.411000 | -2.398000 | 0.021000  |
| H | -2.072000 | -1.118000 | -1.140000 |
| H | -0.899000 | -2.407000 | -0.877000 |

Total Energy: -315.603487286

1g2g

|   |           |           |           |
|---|-----------|-----------|-----------|
| C | -0.226000 | 2.139000  | 0.387000  |
| H | 0.609000  | 2.365000  | -0.278000 |
| H | -1.133000 | 2.149000  | -0.215000 |
| H | -0.298000 | 2.957000  | 1.108000  |
| C | -0.017000 | 0.821000  | 1.113000  |
| H | 0.916000  | 0.896000  | 1.681000  |
| H | -0.804000 | 0.684000  | 1.862000  |
| C | 0.045000  | -0.454000 | 0.259000  |
| C | 0.814000  | -0.227000 | -1.040000 |
| H | 0.302000  | 0.538000  | -1.628000 |
| H | 0.760000  | -1.148000 | -1.631000 |
| C | 2.268000  | 0.170000  | -0.866000 |
| H | 2.856000  | -0.638000 | -0.429000 |
| H | 2.720000  | 0.419000  | -1.829000 |
| H | 2.373000  | 1.041000  | -0.217000 |
| C | -1.352000 | -0.997000 | -0.061000 |
| H | -1.817000 | -1.298000 | 0.884000  |
| H | -1.214000 | -1.920000 | -0.635000 |
| C | 0.737000  | -1.530000 | 1.086000  |
| H | 0.797000  | -2.470000 | 0.532000  |
| H | 1.748000  | -1.233000 | 1.367000  |
| H | 0.179000  | -1.717000 | 2.007000  |
| C | -2.314000 | -0.094000 | -0.808000 |
| H | -3.209000 | -0.651000 | -1.093000 |
| H | -2.640000 | 0.745000  | -0.192000 |
| H | -1.874000 | 0.308000  | -1.723000 |

Total Energy: -315.582553168

1g2g3g

|   |           |           |           |
|---|-----------|-----------|-----------|
| C | -1.598000 | 1.741000  | -0.469000 |
| H | -2.458000 | 1.082000  | -0.336000 |
| H | -1.483000 | 2.325000  | 0.447000  |
| H | -1.841000 | 2.438000  | -1.273000 |
| C | -0.338000 | 0.963000  | -0.795000 |
| H | -0.492000 | 0.395000  | -1.718000 |
| H | 0.468000  | 1.670000  | -1.008000 |
| C | 0.139000  | 0.005000  | 0.297000  |
| C | 1.312000  | -0.825000 | -0.230000 |
| H | 0.972000  | -1.397000 | -1.098000 |
| H | 1.576000  | -1.560000 | 0.539000  |
| C | 2.555000  | -0.047000 | -0.619000 |
| H | 2.967000  | 0.507000  | 0.226000  |
| H | 3.332000  | -0.724000 | -0.977000 |
| H | 2.351000  | 0.667000  | -1.420000 |
| C | -0.983000 | -0.943000 | 0.728000  |
| H | -1.756000 | -0.356000 | 1.232000  |
| H | -0.575000 | -1.617000 | 1.489000  |
| C | 0.577000  | 0.788000  | 1.526000  |
| H | 1.016000  | 0.117000  | 2.270000  |
| H | 1.319000  | 1.548000  | 1.277000  |
| H | -0.271000 | 1.290000  | 1.995000  |
| C | -1.621000 | -1.759000 | -0.379000 |
| H | -2.411000 | -2.398000 | 0.022000  |
| H | -2.072000 | -1.119000 | -1.140000 |
| H | -0.898000 | -2.407000 | -0.877000 |

Total Energy: -315.602975543

1g3g

|   |           |           |           |
|---|-----------|-----------|-----------|
| C | -1.598000 | 1.741000  | -0.469000 |
| H | -2.458000 | 1.082000  | -0.336000 |
| H | -1.483000 | 2.325000  | 0.447000  |
| H | -1.841000 | 2.438000  | -1.273000 |
| C | -0.338000 | 0.963000  | -0.795000 |
| H | -0.492000 | 0.395000  | -1.718000 |
| H | 0.468000  | 1.670000  | -1.008000 |
| C | 0.139000  | 0.005000  | 0.297000  |
| C | 1.312000  | -0.825000 | -0.230000 |
| H | 0.972000  | -1.397000 | -1.098000 |
| H | 1.576000  | -1.560000 | 0.539000  |
| C | 2.555000  | -0.047000 | -0.619000 |
| H | 2.967000  | 0.507000  | 0.226000  |
| H | 3.332000  | -0.724000 | -0.977000 |
| H | 2.351000  | 0.667000  | -1.420000 |
| C | -0.983000 | -0.943000 | 0.728000  |
| H | -1.756000 | -0.356000 | 1.232000  |
| H | -0.575000 | -1.617000 | 1.489000  |
| C | 0.577000  | 0.788000  | 1.526000  |
| H | 1.016000  | 0.117000  | 2.270000  |
| H | 1.319000  | 1.548000  | 1.277000  |
| H | -0.271000 | 1.290000  | 1.995000  |
| C | -1.621000 | -1.759000 | -0.379000 |
| H | -2.411000 | -2.398000 | 0.022000  |
| H | -2.072000 | -1.119000 | -1.140000 |
| H | -0.898000 | -2.407000 | -0.877000 |

Total Energy: -315.601938904

3,3-Dimethylhexane

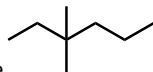

|   |           |           |           |
|---|-----------|-----------|-----------|
| C | 1.099000  | 2.094000  | -0.017000 |
| H | 0.069000  | 2.318000  | 0.269000  |
| H | 1.701000  | 2.085000  | 0.893000  |
| H | 1.454000  | 2.918000  | -0.638000 |
| C | 1.194000  | 0.779000  | -0.765000 |
| H | 0.592000  | 0.838000  | -1.677000 |
| H | 2.226000  | 0.621000  | -1.096000 |
| C | 0.763000  | -0.458000 | 0.024000  |
| C | -0.650000 | -0.303000 | 0.586000  |
| H | -0.638000 | 0.470000  | 1.361000  |
| H | -0.914000 | -1.235000 | 1.099000  |
| C | -1.736000 | 0.031000  | -0.417000 |
| H | -1.764000 | -0.729000 | -1.204000 |
| H | -1.503000 | 0.977000  | -0.913000 |
| C | -3.099000 | 0.128000  | 0.241000  |
| H | -3.102000 | 0.900000  | 1.015000  |
| H | -3.880000 | 0.375000  | -0.481000 |
| H | -3.369000 | -0.817000 | 0.719000  |
| C | 1.713000  | -0.695000 | 1.188000  |
| H | 1.684000  | 0.129000  | 1.904000  |
| H | 1.440000  | -1.608000 | 1.723000  |
| H | 2.742000  | -0.805000 | 0.835000  |
| C | 0.832000  | -1.662000 | -0.904000 |
| H | 0.521000  | -2.572000 | -0.385000 |
| H | 0.191000  | -1.532000 | -1.778000 |
| H | 1.854000  | -1.810000 | -1.261000 |

Total Energy: -315.607683161

1g

|   |           |           |           |
|---|-----------|-----------|-----------|
| C | -2.151000 | -1.613000 | 0.007000  |
| H | -1.352000 | -2.334000 | -0.174000 |
| H | -2.311000 | -1.553000 | 1.085000  |
| H | -3.063000 | -2.018000 | -0.436000 |
| C | -1.830000 | -0.255000 | -0.586000 |
| H | -1.692000 | -0.357000 | -1.668000 |
| H | -2.690000 | 0.409000  | -0.449000 |
| C | -0.597000 | 0.454000  | -0.018000 |
| C | 0.638000  | -0.414000 | -0.250000 |
| H | 0.671000  | -0.692000 | -1.311000 |
| H | 0.521000  | -1.349000 | 0.307000  |
| C | 1.972000  | 0.200000  | 0.132000  |
| H | 1.948000  | 0.516000  | 1.179000  |
| H | 2.151000  | 1.101000  | -0.459000 |
| C | 3.116000  | -0.774000 | -0.075000 |
| H | 3.172000  | -1.092000 | -1.119000 |
| H | 4.078000  | -0.331000 | 0.192000  |
| H | 2.980000  | -1.671000 | 0.534000  |
| C | -0.791000 | 0.724000  | 1.467000  |
| H | -0.821000 | -0.203000 | 2.043000  |
| H | 0.019000  | 1.337000  | 1.864000  |
| H | -1.727000 | 1.261000  | 1.639000  |
| C | -0.457000 | 1.781000  | -0.748000 |
| H | 0.359000  | 2.380000  | -0.341000 |
| H | -0.266000 | 1.621000  | -1.813000 |
| H | -1.376000 | 2.364000  | -0.655000 |

Total Energy: -315.606584608

1g2g

|   |           |           |           |
|---|-----------|-----------|-----------|
| C | 1.097000  | 2.094000  | -0.017000 |
| H | 0.067000  | 2.318000  | 0.269000  |
| H | 1.699000  | 2.085000  | 0.894000  |
| H | 1.453000  | 2.919000  | -0.637000 |
| C | 1.193000  | 0.779000  | -0.765000 |
| H | 0.593000  | 0.838000  | -1.677000 |
| H | 2.226000  | 0.622000  | -1.096000 |
| C | 0.763000  | -0.458000 | 0.024000  |
| C | -0.649000 | -0.303000 | 0.586000  |
| H | -0.638000 | 0.469000  | 1.362000  |
| H | -0.914000 | -1.235000 | 1.099000  |
| C | -1.735000 | 0.031000  | -0.417000 |
| H | -1.763000 | -0.727000 | -1.205000 |
| H | -1.503000 | 0.979000  | -0.911000 |
| C | -3.099000 | 0.127000  | 0.241000  |
| H | -3.103000 | 0.897000  | 1.016000  |
| H | -3.880000 | 0.374000  | -0.481000 |
| H | -3.369000 | -0.819000 | 0.717000  |
| C | 1.714000  | -0.695000 | 1.188000  |
| H | 1.685000  | 0.128000  | 1.904000  |
| H | 1.441000  | -1.608000 | 1.723000  |
| H | 2.742000  | -0.805000 | 0.834000  |
| C | 0.832000  | -1.662000 | -0.904000 |
| H | 0.522000  | -2.572000 | -0.385000 |
| H | 0.191000  | -1.532000 | -1.778000 |
| H | 1.854000  | -1.809000 | -1.262000 |

Total Energy: -315.607683207

2g

|   |           |           |           |
|---|-----------|-----------|-----------|
| C | 2.574000  | -1.175000 | -0.096000 |
| H | 3.165000  | -0.517000 | -0.736000 |
| H | 2.848000  | -0.969000 | 0.940000  |
| H | 2.873000  | -2.201000 | -0.316000 |
| C | 1.085000  | -0.994000 | -0.326000 |
| H | 0.852000  | -1.212000 | -1.374000 |
| H | 0.545000  | -1.734000 | 0.270000  |
| C | 0.531000  | 0.393000  | 0.005000  |
| C | -0.942000 | 0.463000  | -0.402000 |
| H | -1.004000 | 0.326000  | -1.489000 |
| H | -1.300000 | 1.480000  | -0.204000 |
| C | -1.885000 | -0.519000 | 0.265000  |
| H | -1.827000 | -0.410000 | 1.352000  |
| H | -1.580000 | -1.544000 | 0.040000  |
| C | -3.318000 | -0.311000 | -0.187000 |
| H | -3.408000 | -0.437000 | -1.269000 |
| H | -3.999000 | -1.020000 | 0.290000  |
| H | -3.661000 | 0.698000  | 0.056000  |
| C | 1.274000  | 1.460000  | -0.785000 |
| H | 1.229000  | 1.253000  | -1.858000 |
| H | 0.825000  | 2.441000  | -0.613000 |
| H | 2.323000  | 1.520000  | -0.493000 |
| C | 0.677000  | 0.687000  | 1.491000  |
| H | 0.192000  | 1.634000  | 1.741000  |
| H | 0.227000  | -0.097000 | 2.102000  |
| H | 1.728000  | 0.770000  | 1.774000  |

Total Energy: -315.606515716



3-Ethyl-2-methylpentane

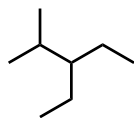

|   |           |           |           |
|---|-----------|-----------|-----------|
| C | -2.212000 | 0.838000  | 0.384000  |
| H | -2.311000 | 0.624000  | 1.453000  |
| H | -1.876000 | 1.870000  | 0.279000  |
| H | -3.206000 | 0.766000  | -0.062000 |
| C | -1.261000 | -0.150000 | -0.270000 |
| H | -1.112000 | 0.158000  | -1.311000 |
| C | 0.111000  | -0.166000 | 0.411000  |
| H | -0.042000 | -0.572000 | 1.422000  |
| C | 1.073000  | -1.100000 | -0.316000 |
| H | 1.115000  | -0.819000 | -1.373000 |
| H | 0.667000  | -2.113000 | -0.291000 |
| C | 2.475000  | -1.128000 | 0.261000  |
| H | 2.452000  | -1.326000 | 1.336000  |
| H | 3.075000  | -1.910000 | -0.209000 |
| H | 2.997000  | -0.180000 | 0.112000  |
| C | -1.900000 | -1.529000 | -0.278000 |
| H | -1.322000 | -2.253000 | -0.852000 |
| H | -1.997000 | -1.909000 | 0.744000  |
| H | -2.901000 | -1.486000 | -0.712000 |
| C | 0.700000  | 1.231000  | 0.582000  |
| H | 1.632000  | 1.151000  | 1.146000  |
| H | 0.032000  | 1.829000  | 1.205000  |
| C | 0.963000  | 1.957000  | -0.724000 |
| H | 0.043000  | 2.104000  | -1.293000 |
| H | 1.400000  | 2.941000  | -0.542000 |
| H | 1.657000  | 1.401000  | -1.358000 |

Total Energy: -315.604241762

2,3-dimethylhexane

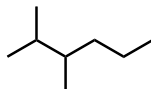

|   |           |           |           |
|---|-----------|-----------|-----------|
| C | 1.931000  | -1.433000 | -0.787000 |
| H | 1.263000  | -2.169000 | -0.334000 |
| H | 1.740000  | -1.423000 | -1.863000 |
| H | 2.954000  | -1.781000 | -0.628000 |
| C | 1.729000  | -0.057000 | -0.179000 |
| H | 2.457000  | 0.618000  | -0.645000 |
| C | 0.345000  | 0.515000  | -0.506000 |
| H | 0.198000  | 0.370000  | -1.585000 |
| C | -0.780000 | -0.218000 | 0.209000  |
| H | -0.759000 | 0.038000  | 1.274000  |
| H | -0.614000 | -1.298000 | 0.151000  |
| C | -2.161000 | 0.080000  | -0.343000 |
| H | -2.174000 | -0.148000 | -1.414000 |
| H | -2.375000 | 1.149000  | -0.255000 |
| C | -3.245000 | -0.710000 | 0.363000  |
| H | -3.262000 | -0.478000 | 1.431000  |
| H | -4.235000 | -0.492000 | -0.042000 |
| H | -3.072000 | -1.785000 | 0.263000  |
| C | 2.018000  | -0.094000 | 1.312000  |
| H | 1.881000  | 0.883000  | 1.780000  |
| H | 1.362000  | -0.806000 | 1.817000  |
| H | 3.048000  | -0.409000 | 1.494000  |
| C | 0.290000  | 2.007000  | -0.230000 |
| H | -0.646000 | 2.446000  | -0.579000 |
| H | 0.369000  | 2.210000  | 0.841000  |
| H | 1.109000  | 2.529000  | -0.732000 |

Total Energy: -315.605268377

1g

|   |           |           |           |
|---|-----------|-----------|-----------|
| C | 1.931000  | -1.434000 | -0.787000 |
| H | 1.263000  | -2.170000 | -0.333000 |
| H | 1.739000  | -1.424000 | -1.862000 |
| H | 2.954000  | -1.782000 | -0.628000 |
| C | 1.729000  | -0.057000 | -0.179000 |
| H | 2.457000  | 0.618000  | -0.645000 |
| C | 0.345000  | 0.515000  | -0.507000 |
| H | 0.198000  | 0.369000  | -1.585000 |
| C | -0.780000 | -0.218000 | 0.209000  |
| H | -0.759000 | 0.038000  | 1.274000  |
| H | -0.614000 | -1.298000 | 0.151000  |
| C | -2.161000 | 0.080000  | -0.343000 |
| H | -2.175000 | -0.148000 | -1.414000 |
| H | -2.375000 | 1.149000  | -0.255000 |
| C | -3.245000 | -0.710000 | 0.364000  |
| H | -3.262000 | -0.478000 | 1.432000  |
| H | -4.235000 | -0.492000 | -0.041000 |
| H | -3.072000 | -1.785000 | 0.264000  |
| C | 2.018000  | -0.093000 | 1.311000  |
| H | 1.882000  | 0.884000  | 1.779000  |
| H | 1.362000  | -0.805000 | 1.817000  |
| H | 3.048000  | -0.408000 | 1.494000  |
| C | 0.290000  | 2.007000  | -0.231000 |
| H | -0.646000 | 2.446000  | -0.580000 |
| H | 0.368000  | 2.210000  | 0.840000  |
| H | 1.109000  | 2.528000  | -0.732000 |

Total Energy: -315.605268378

1g3g

|   |           |           |           |
|---|-----------|-----------|-----------|
| C | 1.839000  | -1.581000 | -0.398000 |
| H | 1.530000  | -2.038000 | 0.545000  |
| H | 1.291000  | -2.072000 | -1.205000 |
| H | 2.902000  | -1.797000 | -0.530000 |
| C | 1.591000  | -0.083000 | -0.392000 |
| H | 2.015000  | 0.324000  | -1.318000 |
| C | 0.095000  | 0.250000  | -0.436000 |
| H | -0.302000 | -0.283000 | -1.308000 |
| C | -0.657000 | -0.243000 | 0.791000  |
| H | -0.242000 | 0.240000  | 1.681000  |
| H | -0.486000 | -1.317000 | 0.911000  |
| C | -2.157000 | 0.003000  | 0.757000  |
| H | -2.357000 | 1.078000  | 0.769000  |
| H | -2.595000 | -0.394000 | 1.678000  |
| C | -2.846000 | -0.630000 | -0.438000 |
| H | -2.622000 | -1.699000 | -0.494000 |
| H | -3.930000 | -0.517000 | -0.377000 |
| H | -2.520000 | -0.176000 | -1.376000 |
| C | 2.322000  | 0.567000  | 0.769000  |
| H | 2.183000  | 1.649000  | 0.786000  |
| H | 1.976000  | 0.166000  | 1.725000  |
| H | 3.394000  | 0.370000  | 0.702000  |
| C | -0.132000 | 1.735000  | -0.660000 |
| H | -1.171000 | 1.946000  | -0.918000 |
| H | 0.105000  | 2.310000  | 0.238000  |
| H | 0.494000  | 2.107000  | -1.474000 |

Total Energy: -315.604830670

2g

|   |           |           |           |
|---|-----------|-----------|-----------|
| C | -2.722000 | -0.025000 | -0.376000 |
| H | -3.154000 | 0.035000  | 0.627000  |
| H | -2.869000 | 0.938000  | -0.865000 |
| H | -3.289000 | -0.772000 | -0.937000 |
| C | -1.255000 | -0.412000 | -0.297000 |
| H | -0.847000 | -0.395000 | -1.314000 |
| C | -0.458000 | 0.589000  | 0.540000  |
| H | -0.928000 | 0.613000  | 1.532000  |
| C | 0.994000  | 0.170000  | 0.749000  |
| H | 1.033000  | -0.749000 | 1.341000  |
| H | 1.489000  | 0.937000  | 1.355000  |
| C | 1.795000  | -0.035000 | -0.523000 |
| H | 1.761000  | 0.872000  | -1.133000 |
| H | 1.337000  | -0.825000 | -1.125000 |
| C | 3.238000  | -0.397000 | -0.230000 |
| H | 3.297000  | -1.316000 | 0.360000  |
| H | 3.812000  | -0.552000 | -1.146000 |
| H | 3.729000  | 0.393000  | 0.344000  |
| C | -1.131000 | -1.826000 | 0.243000  |
| H | -0.107000 | -2.198000 | 0.197000  |
| H | -1.454000 | -1.864000 | 1.288000  |
| H | -1.761000 | -2.513000 | -0.325000 |
| C | -0.531000 | 1.992000  | -0.043000 |
| H | 0.127000  | 2.672000  | 0.503000  |
| H | -0.222000 | 1.998000  | -1.091000 |
| H | -1.540000 | 2.400000  | 0.006000  |

Total Energy: -315.605275756

2g3g

|   |           |           |           |
|---|-----------|-----------|-----------|
| C | -2.455000 | -0.291000 | -0.584000 |
| H | -3.047000 | -0.068000 | 0.310000  |
| H | -2.591000 | 0.528000  | -1.290000 |
| H | -2.868000 | -1.194000 | -1.038000 |
| C | -0.995000 | -0.497000 | -0.213000 |
| H | -0.428000 | -0.613000 | -1.144000 |
| C | -0.427000 | 0.711000  | 0.530000  |
| H | -0.987000 | 0.787000  | 1.472000  |
| C | 1.047000  | 0.573000  | 0.914000  |
| H | 1.176000  | -0.266000 | 1.603000  |
| H | 1.305000  | 1.469000  | 1.486000  |
| C | 2.036000  | 0.426000  | -0.241000 |
| H | 2.979000  | 0.901000  | 0.044000  |
| H | 1.677000  | 0.984000  | -1.110000 |
| C | 2.335000  | -1.008000 | -0.643000 |
| H | 1.452000  | -1.525000 | -1.019000 |
| H | 3.098000  | -1.045000 | -1.424000 |
| H | 2.709000  | -1.577000 | 0.212000  |
| C | -0.863000 | -1.770000 | 0.603000  |
| H | 0.173000  | -2.009000 | 0.838000  |
| H | -1.407000 | -1.669000 | 1.547000  |
| H | -1.288000 | -2.621000 | 0.066000  |
| C | -0.651000 | 2.005000  | -0.239000 |
| H | -0.133000 | 2.836000  | 0.245000  |
| H | -0.274000 | 1.929000  | -1.262000 |
| H | -1.708000 | 2.262000  | -0.297000 |

Total Energy: -315.601510649

3g

|   |           |           |           |
|---|-----------|-----------|-----------|
| C | -2.586000 | 0.700000  | 0.476000  |
| H | -2.403000 | 0.663000  | 1.555000  |
| H | -2.560000 | 1.744000  | 0.166000  |
| H | -3.597000 | 0.328000  | 0.299000  |
| C | -1.566000 | -0.153000 | -0.261000 |
| H | -1.726000 | -0.024000 | -1.340000 |
| C | -0.130000 | 0.285000  | 0.039000  |
| H | 0.015000  | 0.171000  | 1.121000  |
| C | 0.879000  | -0.609000 | -0.674000 |
| H | 0.640000  | -0.615000 | -1.744000 |
| H | 0.756000  | -1.636000 | -0.323000 |
| C | 2.338000  | -0.223000 | -0.488000 |
| H | 2.536000  | 0.744000  | -0.959000 |
| H | 2.957000  | -0.949000 | -1.023000 |
| C | 2.761000  | -0.179000 | 0.968000  |
| H | 2.545000  | -1.129000 | 1.464000  |
| H | 3.831000  | 0.015000  | 1.067000  |
| H | 2.231000  | 0.604000  | 1.515000  |
| C | -1.803000 | -1.615000 | 0.082000  |
| H | -1.212000 | -2.291000 | -0.537000 |
| H | -1.548000 | -1.806000 | 1.129000  |
| H | -2.854000 | -1.875000 | -0.055000 |
| C | 0.094000  | 1.743000  | -0.321000 |
| H | 1.111000  | 2.059000  | -0.087000 |
| H | -0.064000 | 1.899000  | -1.393000 |
| H | -0.582000 | 2.404000  | 0.219000  |

Total Energy: -315.604597064

2,4-dimethylhexane

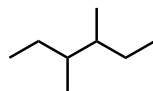

|   |           |           |           |
|---|-----------|-----------|-----------|
| C | -2.942000 | -0.845000 | 0.314000  |
| H | -3.019000 | -1.479000 | -0.574000 |
| H | -2.829000 | -1.499000 | 1.182000  |
| H | -3.884000 | -0.301000 | 0.418000  |
| C | -1.767000 | 0.106000  | 0.183000  |
| H | -1.739000 | 0.732000  | 1.082000  |
| C | -0.469000 | -0.683000 | 0.107000  |
| H | -0.380000 | -1.302000 | 1.009000  |
| H | -0.543000 | -1.382000 | -0.735000 |
| C | 0.809000  | 0.128000  | -0.045000 |
| H | 0.763000  | 0.671000  | -0.997000 |
| C | 2.003000  | -0.814000 | -0.118000 |
| H | 1.790000  | -1.585000 | -0.866000 |
| H | 2.094000  | -1.337000 | 0.841000  |
| C | 3.314000  | -0.135000 | -0.461000 |
| H | 3.620000  | 0.571000  | 0.313000  |
| H | 4.119000  | -0.864000 | -0.574000 |
| H | 3.230000  | 0.418000  | -1.400000 |
| C | -1.947000 | 1.011000  | -1.021000 |
| H | -1.163000 | 1.767000  | -1.086000 |
| H | -1.922000 | 0.424000  | -1.944000 |
| H | -2.909000 | 1.528000  | -0.981000 |
| C | 0.962000  | 1.139000  | 1.075000  |
| H | 0.980000  | 0.631000  | 2.044000  |
| H | 1.886000  | 1.710000  | 0.978000  |
| H | 0.137000  | 1.853000  | 1.088000  |

Total Energy: -315.607015734



2,5-dimethylhexane

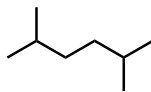

|   |           |           |           |
|---|-----------|-----------|-----------|
| C | 3.047000  | -0.836000 | -0.414000 |
| H | 3.084000  | -1.434000 | 0.502000  |
| H | 2.882000  | -1.518000 | -1.251000 |
| H | 4.025000  | -0.368000 | -0.544000 |
| C | 1.944000  | 0.202000  | -0.321000 |
| H | 1.940000  | 0.785000  | -1.250000 |
| C | 0.589000  | -0.477000 | -0.195000 |
| H | 0.471000  | -1.186000 | -1.023000 |
| H | 0.588000  | -1.076000 | 0.723000  |
| C | -0.589000 | 0.477000  | -0.195000 |
| H | -0.471000 | 1.186000  | -1.023000 |
| H | -0.588000 | 1.076000  | 0.723000  |
| C | -1.944000 | -0.202000 | -0.321000 |
| H | -1.940000 | -0.785000 | -1.250000 |
| C | -3.047000 | 0.836000  | -0.414000 |
| H | -3.084000 | 1.434000  | 0.502000  |
| H | -2.882000 | 1.518000  | -1.251000 |
| H | -4.025000 | 0.368000  | -0.544000 |
| C | 2.207000  | 1.151000  | 0.834000  |
| H | 1.474000  | 1.957000  | 0.876000  |
| H | 2.166000  | 0.610000  | 1.785000  |
| H | 3.198000  | 1.603000  | 0.751000  |
| C | -2.207000 | -1.151000 | 0.834000  |
| H | -1.473000 | -1.957000 | 0.876000  |
| H | -2.166000 | -0.610000 | 1.785000  |
| H | -3.198000 | -1.603000 | 0.751000  |

Total Energy: -315.607518606

1g

|   |           |           |           |
|---|-----------|-----------|-----------|
| C | -2.503000 | 1.147000  | -0.501000 |
| H | -2.006000 | 1.824000  | 0.198000  |
| H | -2.292000 | 1.495000  | -1.515000 |
| H | -3.578000 | 1.235000  | -0.330000 |
| C | -2.040000 | -0.286000 | -0.302000 |
| H | -2.621000 | -0.917000 | -0.984000 |
| C | -0.573000 | -0.476000 | -0.674000 |
| H | -0.346000 | -1.546000 | -0.643000 |
| H | -0.431000 | -0.160000 | -1.714000 |
| C | 0.414000  | 0.272000  | 0.202000  |
| H | 0.379000  | -0.120000 | 1.224000  |
| H | 0.123000  | 1.325000  | 0.266000  |
| C | 1.853000  | 0.203000  | -0.288000 |
| H | 1.877000  | 0.598000  | -1.311000 |
| C | 2.745000  | 1.072000  | 0.579000  |
| H | 2.747000  | 0.704000  | 1.610000  |
| H | 3.777000  | 1.066000  | 0.221000  |
| H | 2.396000  | 2.107000  | 0.596000  |
| C | -2.329000 | -0.750000 | 1.115000  |
| H | -1.982000 | -1.774000 | 1.276000  |
| H | -1.831000 | -0.108000 | 1.845000  |
| H | -3.400000 | -0.718000 | 1.325000  |
| C | 2.375000  | -1.222000 | -0.317000 |
| H | 2.314000  | -1.667000 | 0.681000  |
| H | 1.807000  | -1.854000 | -1.001000 |
| H | 3.421000  | -1.248000 | -0.629000 |

Total Energy: -315.606190531

1g3g

|   |           |           |           |
|---|-----------|-----------|-----------|
| C | 2.329000  | -0.750000 | 1.115000  |
| H | 1.831000  | -0.108000 | 1.845000  |
| H | 1.983000  | -1.773000 | 1.277000  |
| H | 3.401000  | -0.716000 | 1.326000  |
| C | 2.040000  | -0.286000 | -0.302000 |
| H | 2.620000  | -0.918000 | -0.984000 |
| C | 0.573000  | -0.476000 | -0.674000 |
| H | 0.430000  | -0.162000 | -1.714000 |
| H | 0.346000  | -1.546000 | -0.641000 |
| C | -0.414000 | 0.272000  | 0.202000  |
| H | -0.123000 | 1.325000  | 0.266000  |
| H | -0.379000 | -0.120000 | 1.224000  |
| C | -1.853000 | 0.203000  | -0.288000 |
| H | -1.876000 | 0.598000  | -1.311000 |
| C | -2.375000 | -1.222000 | -0.317000 |
| H | -2.314000 | -1.667000 | 0.681000  |
| H | -3.421000 | -1.248000 | -0.629000 |
| H | -1.807000 | -1.853000 | -1.001000 |
| C | 2.503000  | 1.147000  | -0.502000 |
| H | 2.291000  | 1.494000  | -1.516000 |
| H | 2.005000  | 1.824000  | 0.196000  |
| H | 3.578000  | 1.235000  | -0.331000 |
| C | -2.745000 | 1.072000  | 0.579000  |
| H | -2.748000 | 0.704000  | 1.609000  |
| H | -2.395000 | 2.107000  | 0.596000  |
| H | -3.776000 | 1.067000  | 0.221000  |

Total Energy: -315.606190518

3,4-dimethylhexane

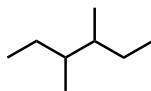

|   |           |           |           |
|---|-----------|-----------|-----------|
| C | -2.785000 | -1.145000 | 0.135000  |
| H | -3.480000 | -0.318000 | -0.026000 |
| H | -2.720000 | -1.709000 | -0.799000 |
| H | -3.224000 | -1.800000 | 0.890000  |
| C | -1.415000 | -0.653000 | 0.563000  |
| H | -1.509000 | -0.072000 | 1.486000  |
| H | -0.789000 | -1.516000 | 0.804000  |
| C | -0.720000 | 0.198000  | -0.491000 |
| H | -0.748000 | -0.364000 | -1.434000 |
| C | 0.761000  | 0.441000  | -0.177000 |
| H | 1.121000  | 1.159000  | -0.925000 |
| C | 1.585000  | -0.827000 | -0.350000 |
| H | 1.337000  | -1.273000 | -1.318000 |
| H | 1.294000  | -1.559000 | 0.410000  |
| C | 3.083000  | -0.596000 | -0.274000 |
| H | 3.389000  | -0.257000 | 0.717000  |
| H | 3.635000  | -1.512000 | -0.492000 |
| H | 3.396000  | 0.163000  | -0.996000 |
| C | -1.458000 | 1.507000  | -0.714000 |
| H | -1.532000 | 2.080000  | 0.213000  |
| H | -0.940000 | 2.125000  | -1.451000 |
| H | -2.472000 | 1.338000  | -1.077000 |
| C | 0.973000  | 1.055000  | 1.196000  |
| H | 0.332000  | 1.924000  | 1.353000  |
| H | 0.756000  | 0.330000  | 1.984000  |
| H | 2.005000  | 1.385000  | 1.326000  |

Total Energy: -315.604413408

1g

|   |           |           |           |
|---|-----------|-----------|-----------|
| C | -2.405000 | -0.694000 | 0.922000  |
| H | -1.663000 | -1.332000 | 1.406000  |
| H | -2.534000 | 0.194000  | 1.544000  |
| H | -3.353000 | -1.235000 | 0.920000  |
| C | -1.987000 | -0.327000 | -0.490000 |
| H | -1.884000 | -1.236000 | -1.086000 |
| H | -2.786000 | 0.252000  | -0.963000 |
| C | -0.700000 | 0.492000  | -0.573000 |
| H | -0.472000 | 0.615000  | -1.640000 |
| C | 0.502000  | -0.216000 | 0.057000  |
| H | 0.325000  | -0.274000 | 1.139000  |
| C | 1.782000  | 0.587000  | -0.149000 |
| H | 1.636000  | 1.596000  | 0.241000  |
| H | 1.957000  | 0.696000  | -1.226000 |
| C | 3.009000  | -0.010000 | 0.513000  |
| H | 3.306000  | -0.954000 | 0.055000  |
| H | 3.861000  | 0.669000  | 0.442000  |
| H | 2.824000  | -0.200000 | 1.574000  |
| C | -0.921000 | 1.876000  | 0.019000  |
| H | -0.972000 | 1.833000  | 1.110000  |
| H | -0.124000 | 2.570000  | -0.247000 |
| H | -1.861000 | 2.302000  | -0.341000 |
| C | 0.659000  | -1.628000 | -0.477000 |
| H | -0.212000 | -2.245000 | -0.258000 |
| H | 0.795000  | -1.612000 | -1.563000 |
| H | 1.526000  | -2.125000 | -0.040000 |

Total Energy: -315.603761748

1g3g

|   |           |           |           |
|---|-----------|-----------|-----------|
| C | -2.409000 | 1.095000  | -0.633000 |
| H | -2.168000 | 1.630000  | 0.288000  |
| H | -2.032000 | 1.688000  | -1.468000 |
| H | -3.497000 | 1.061000  | -0.718000 |
| C | -1.823000 | -0.304000 | -0.634000 |
| H | -2.222000 | -0.864000 | 0.215000  |
| H | -2.162000 | -0.835000 | -1.529000 |
| C | -0.297000 | -0.357000 | -0.607000 |
| H | -0.026000 | -1.416000 | -0.526000 |
| C | 0.297000  | 0.357000  | 0.607000  |
| H | 0.026000  | 1.416000  | 0.526000  |
| C | 1.823000  | 0.304000  | 0.634000  |
| H | 2.162000  | 0.835000  | 1.529000  |
| H | 2.222000  | 0.864000  | -0.215000 |
| C | 2.409000  | -1.095000 | 0.633000  |
| H | 2.168000  | -1.630000 | -0.288000 |
| H | 3.497000  | -1.061000 | 0.718000  |
| H | 2.032000  | -1.688000 | 1.468000  |
| C | 0.283000  | 0.174000  | -1.907000 |
| H | 0.173000  | 1.259000  | -1.974000 |
| H | 1.346000  | -0.053000 | -1.998000 |
| H | -0.225000 | -0.267000 | -2.767000 |
| C | -0.283000 | -0.174000 | 1.907000  |
| H | -1.346000 | 0.053000  | 1.998000  |
| H | -0.173000 | -1.259000 | 1.974000  |
| H | 0.225000  | 0.267000  | 2.767000  |

Total Energy: -315.604096481

2g

|   |           |           |           |
|---|-----------|-----------|-----------|
| C | -2.785000 | -1.145000 | 0.135000  |
| H | -3.480000 | -0.319000 | -0.026000 |
| H | -2.719000 | -1.710000 | -0.799000 |
| H | -3.224000 | -1.800000 | 0.890000  |
| C | -1.415000 | -0.653000 | 0.563000  |
| H | -1.509000 | -0.072000 | 1.486000  |
| H | -0.789000 | -1.516000 | 0.804000  |
| C | -0.720000 | 0.198000  | -0.491000 |
| H | -0.748000 | -0.364000 | -1.434000 |
| C | 0.761000  | 0.441000  | -0.177000 |
| H | 1.121000  | 1.159000  | -0.925000 |
| C | 1.585000  | -0.827000 | -0.350000 |
| H | 1.337000  | -1.274000 | -1.318000 |
| H | 1.294000  | -1.559000 | 0.410000  |
| C | 3.083000  | -0.596000 | -0.274000 |
| H | 3.389000  | -0.257000 | 0.717000  |
| H | 3.635000  | -1.513000 | -0.492000 |
| H | 3.396000  | 0.162000  | -0.997000 |
| C | -1.457000 | 1.507000  | -0.714000 |
| H | -1.532000 | 2.080000  | 0.213000  |
| H | -0.940000 | 2.126000  | -1.451000 |
| H | -2.472000 | 1.338000  | -1.077000 |
| C | 0.974000  | 1.056000  | 1.196000  |
| H | 0.332000  | 1.924000  | 1.352000  |
| H | 0.756000  | 0.330000  | 1.984000  |
| H | 2.005000  | 1.384000  | 1.326000  |

Total Energy: -315.604413414

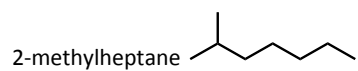

|   |           |           |           |
|---|-----------|-----------|-----------|
| C | 3.350000  | -0.962000 | 0.002000  |
| H | 3.428000  | -1.092000 | 1.086000  |
| H | 3.172000  | -1.945000 | -0.440000 |
| H | 4.313000  | -0.595000 | -0.359000 |
| C | 2.228000  | 0.004000  | -0.332000 |
| H | 2.181000  | 0.113000  | -1.423000 |
| C | 0.894000  | -0.555000 | 0.136000  |
| H | 0.773000  | -1.565000 | -0.272000 |
| H | 0.924000  | -0.670000 | 1.227000  |
| C | -0.314000 | 0.276000  | -0.249000 |
| H | -0.303000 | 0.453000  | -1.331000 |
| H | -0.257000 | 1.262000  | 0.222000  |
| C | -1.625000 | -0.378000 | 0.139000  |
| H | -1.631000 | -0.568000 | 1.218000  |
| H | -1.698000 | -1.361000 | -0.341000 |
| C | -2.840000 | 0.450000  | -0.230000 |
| H | -2.830000 | 0.641000  | -1.309000 |
| H | -2.766000 | 1.431000  | 0.252000  |
| C | -4.144000 | -0.217000 | 0.161000  |
| H | -4.184000 | -0.391000 | 1.239000  |
| H | -5.008000 | 0.392000  | -0.111000 |
| H | -4.249000 | -1.186000 | -0.333000 |
| C | 2.512000  | 1.369000  | 0.270000  |
| H | 1.765000  | 2.109000  | -0.022000 |
| H | 2.517000  | 1.307000  | 1.362000  |
| H | 3.490000  | 1.739000  | -0.047000 |

Total Energy: -315.605634110



1g

|   |           |           |           |
|---|-----------|-----------|-----------|
| C | -2.658000 | -1.249000 | -0.419000 |
| H | -2.083000 | -1.271000 | -1.347000 |
| H | -2.422000 | -2.155000 | 0.145000  |
| H | -3.716000 | -1.284000 | -0.689000 |
| C | -2.346000 | -0.000000 | 0.387000  |
| H | -3.000000 | -0.000000 | 1.266000  |
| C | -0.913000 | -0.000000 | 0.908000  |
| H | -0.773000 | 0.876000  | 1.551000  |
| H | -0.772000 | -0.877000 | 1.551000  |
| C | 0.169000  | 0.000000  | -0.155000 |
| H | 0.059000  | 0.876000  | -0.801000 |
| H | 0.059000  | -0.875000 | -0.802000 |
| C | 1.563000  | -0.000000 | 0.440000  |
| H | 1.682000  | -0.876000 | 1.089000  |
| H | 1.682000  | 0.875000  | 1.089000  |
| C | 2.661000  | 0.000000  | -0.606000 |
| H | 2.540000  | 0.876000  | -1.253000 |
| H | 2.540000  | -0.875000 | -1.253000 |
| C | 4.049000  | -0.000000 | 0.003000  |
| H | 4.198000  | -0.882000 | 0.632000  |
| H | 4.828000  | 0.000000  | -0.762000 |
| H | 4.199000  | 0.881000  | 0.633000  |
| C | -2.659000 | 1.249000  | -0.419000 |
| H | -2.423000 | 2.155000  | 0.145000  |
| H | -2.083000 | 1.271000  | -1.347000 |
| H | -3.716000 | 1.284000  | -0.688000 |

Total Energy: -315.604509563

1g2g

|   |           |           |           |
|---|-----------|-----------|-----------|
| C | 2.139000  | -0.031000 | 1.386000  |
| H | 1.165000  | 0.250000  | 1.795000  |
| H | 2.359000  | -1.049000 | 1.718000  |
| H | 2.884000  | 0.636000  | 1.823000  |
| C | 2.144000  | 0.073000  | -0.128000 |
| H | 3.161000  | -0.155000 | -0.469000 |
| C | 1.238000  | -0.975000 | -0.780000 |
| H | 1.123000  | -0.724000 | -1.841000 |
| H | 1.764000  | -1.935000 | -0.751000 |
| C | -0.137000 | -1.195000 | -0.169000 |
| H | -0.030000 | -1.528000 | 0.868000  |
| H | -0.606000 | -2.031000 | -0.700000 |
| C | -1.089000 | -0.015000 | -0.213000 |
| H | -1.095000 | 0.418000  | -1.220000 |
| H | -0.740000 | 0.777000  | 0.456000  |
| C | -2.503000 | -0.395000 | 0.181000  |
| H | -2.487000 | -0.850000 | 1.178000  |
| H | -2.869000 | -1.171000 | -0.500000 |
| C | -3.451000 | 0.788000  | 0.171000  |
| H | -3.496000 | 1.242000  | -0.822000 |
| H | -4.465000 | 0.496000  | 0.452000  |
| H | -3.119000 | 1.559000  | 0.871000  |
| C | 1.847000  | 1.495000  | -0.577000 |
| H | 1.855000  | 1.572000  | -1.667000 |
| H | 0.874000  | 1.838000  | -0.226000 |
| H | 2.600000  | 2.184000  | -0.186000 |

Total Energy: -315.601271504

1g2g3g

|   |           |           |           |
|---|-----------|-----------|-----------|
| C | -2.432000 | -0.021000 | -0.980000 |
| H | -1.658000 | -0.137000 | -1.743000 |
| H | -2.973000 | -0.968000 | -0.908000 |
| H | -3.130000 | 0.742000  | -1.332000 |
| C | -1.827000 | 0.376000  | 0.354000  |
| H | -2.657000 | 0.545000  | 1.051000  |
| C | -0.989000 | -0.749000 | 0.967000  |
| H | -0.430000 | -0.348000 | 1.817000  |
| H | -1.681000 | -1.487000 | 1.386000  |
| C | -0.047000 | -1.507000 | 0.041000  |
| H | -0.632000 | -1.985000 | -0.749000 |
| H | 0.397000  | -2.325000 | 0.619000  |
| C | 1.081000  | -0.710000 | -0.594000 |
| H | 0.676000  | 0.039000  | -1.280000 |
| H | 1.678000  | -1.386000 | -1.216000 |
| C | 2.000000  | -0.033000 | 0.404000  |
| H | 2.403000  | -0.787000 | 1.088000  |
| H | 1.426000  | 0.663000  | 1.021000  |
| C | 3.134000  | 0.711000  | -0.273000 |
| H | 2.745000  | 1.489000  | -0.936000 |
| H | 3.794000  | 1.191000  | 0.452000  |
| H | 3.738000  | 0.033000  | -0.882000 |
| C | -1.086000 | 1.698000  | 0.243000  |
| H | -0.670000 | 1.998000  | 1.207000  |
| H | -0.266000 | 1.648000  | -0.474000 |
| H | -1.763000 | 2.489000  | -0.090000 |

Total Energy: -315.601152141

1g2g3g4g

|   |           |           |           |
|---|-----------|-----------|-----------|
| C | 2.562000  | -0.594000 | 0.501000  |
| H | 2.002000  | -0.706000 | 1.432000  |
| H | 2.786000  | -1.595000 | 0.124000  |
| H | 3.508000  | -0.104000 | 0.743000  |
| C | 1.779000  | 0.219000  | -0.513000 |
| H | 2.424000  | 0.361000  | -1.387000 |
| C | 0.543000  | -0.529000 | -1.021000 |
| H | -0.076000 | 0.166000  | -1.598000 |
| H | 0.886000  | -1.285000 | -1.735000 |
| C | -0.315000 | -1.251000 | 0.008000  |
| H | 0.301000  | -1.979000 | 0.542000  |
| H | -1.058000 | -1.842000 | -0.537000 |
| C | -1.039000 | -0.382000 | 1.026000  |
| H | -0.315000 | 0.081000  | 1.701000  |
| H | -1.659000 | -1.034000 | 1.652000  |
| C | -1.925000 | 0.693000  | 0.419000  |
| H | -1.310000 | 1.410000  | -0.131000 |
| H | -2.397000 | 1.258000  | 1.228000  |
| C | -2.996000 | 0.136000  | -0.500000 |
| H | -3.604000 | -0.612000 | 0.018000  |
| H | -3.664000 | 0.923000  | -0.855000 |
| H | -2.559000 | -0.347000 | -1.376000 |
| C | 1.477000  | 1.608000  | 0.027000  |
| H | 0.931000  | 2.206000  | -0.706000 |
| H | 0.880000  | 1.570000  | 0.939000  |
| H | 2.405000  | 2.135000  | 0.264000  |

Total Energy: -315.600667495

1g2g4g

|   |           |           |           |
|---|-----------|-----------|-----------|
| C | -1.833000 | 1.482000  | 0.374000  |
| H | -0.898000 | 1.531000  | 0.937000  |
| H | -1.772000 | 2.208000  | -0.440000 |
| H | -2.638000 | 1.793000  | 1.045000  |
| C | -2.080000 | 0.079000  | -0.150000 |
| H | -3.060000 | 0.081000  | -0.642000 |
| C | -1.070000 | -0.318000 | -1.229000 |
| H | -1.171000 | -1.391000 | -1.424000 |
| H | -1.357000 | 0.189000  | -2.156000 |
| C | 0.394000  | 0.005000  | -0.972000 |
| H | 0.509000  | 1.085000  | -0.848000 |
| H | 0.956000  | -0.250000 | -1.877000 |
| C | 1.037000  | -0.715000 | 0.200000  |
| H | 0.749000  | -1.771000 | 0.172000  |
| H | 0.651000  | -0.316000 | 1.142000  |
| C | 2.552000  | -0.603000 | 0.209000  |
| H | 2.949000  | -1.032000 | -0.717000 |
| H | 2.952000  | -1.211000 | 1.026000  |
| C | 3.044000  | 0.825000  | 0.359000  |
| H | 2.634000  | 1.282000  | 1.264000  |
| H | 4.133000  | 0.867000  | 0.427000  |
| H | 2.742000  | 1.443000  | -0.489000 |
| C | -2.173000 | -0.919000 | 0.993000  |
| H | -2.349000 | -1.930000 | 0.619000  |
| H | -1.261000 | -0.939000 | 1.590000  |
| H | -2.998000 | -0.659000 | 1.661000  |

Total Energy: -315.600666298

1g3g

|   |           |           |           |
|---|-----------|-----------|-----------|
| C | -2.457000 | 1.338000  | 0.408000  |
| H | -2.172000 | 1.110000  | 1.438000  |
| H | -1.932000 | 2.249000  | 0.109000  |
| H | -3.529000 | 1.547000  | 0.403000  |
| C | -2.125000 | 0.180000  | -0.517000 |
| H | -2.497000 | 0.435000  | -1.516000 |
| C | -0.620000 | -0.027000 | -0.652000 |
| H | -0.439000 | -0.840000 | -1.365000 |
| H | -0.187000 | 0.874000  | -1.097000 |
| C | 0.107000  | -0.347000 | 0.642000  |
| H | -0.381000 | -1.193000 | 1.135000  |
| H | 0.026000  | 0.500000  | 1.330000  |
| C | 1.575000  | -0.678000 | 0.438000  |
| H | 1.663000  | -1.539000 | -0.235000 |
| H | 2.011000  | -0.992000 | 1.392000  |
| C | 2.399000  | 0.470000  | -0.115000 |
| H | 2.261000  | 1.349000  | 0.525000  |
| H | 2.028000  | 0.750000  | -1.104000 |
| C | 3.873000  | 0.128000  | -0.208000 |
| H | 4.031000  | -0.737000 | -0.858000 |
| H | 4.458000  | 0.958000  | -0.610000 |
| H | 4.278000  | -0.123000 | 0.776000  |
| C | -2.841000 | -1.083000 | -0.072000 |
| H | -2.601000 | -1.927000 | -0.724000 |
| H | -2.562000 | -1.357000 | 0.948000  |
| H | -3.924000 | -0.942000 | -0.087000 |

Total Energy: -315.603661452

1g3g4g

|   |           |           |           |
|---|-----------|-----------|-----------|
| C | 1.984000  | 1.512000  | -0.277000 |
| H | 1.657000  | 1.369000  | -1.309000 |
| H | 1.343000  | 2.272000  | 0.177000  |
| H | 3.003000  | 1.902000  | -0.306000 |
| C | 1.925000  | 0.206000  | 0.498000  |
| H | 2.327000  | 0.396000  | 1.500000  |
| C | 0.490000  | -0.276000 | 0.688000  |
| H | 0.499000  | -1.175000 | 1.315000  |
| H | -0.055000 | 0.486000  | 1.254000  |
| C | -0.263000 | -0.581000 | -0.593000 |
| H | 0.300000  | -1.304000 | -1.187000 |
| H | -0.336000 | 0.323000  | -1.203000 |
| C | -1.656000 | -1.137000 | -0.346000 |
| H | -1.570000 | -2.102000 | 0.166000  |
| H | -2.132000 | -1.341000 | -1.311000 |
| C | -2.565000 | -0.226000 | 0.465000  |
| H | -2.177000 | -0.128000 | 1.483000  |
| H | -3.544000 | -0.703000 | 0.561000  |
| C | -2.732000 | 1.151000  | -0.149000 |
| H | -3.085000 | 1.078000  | -1.181000 |
| H | -3.452000 | 1.751000  | 0.410000  |
| H | -1.787000 | 1.699000  | -0.164000 |
| C | 2.802000  | -0.846000 | -0.157000 |
| H | 2.753000  | -1.795000 | 0.382000  |
| H | 2.495000  | -1.029000 | -1.189000 |
| H | 3.846000  | -0.523000 | -0.180000 |

Total Energy: -315.603617882

1g4g

|   |           |           |           |
|---|-----------|-----------|-----------|
| C | 2.545000  | -0.587000 | 1.132000  |
| H | 1.847000  | -0.164000 | 1.859000  |
| H | 2.480000  | -1.676000 | 1.200000  |
| H | 3.551000  | -0.289000 | 1.433000  |
| C | 2.231000  | -0.101000 | -0.272000 |
| H | 3.000000  | -0.501000 | -0.942000 |
| C | 0.894000  | -0.633000 | -0.775000 |
| H | 0.757000  | -0.314000 | -1.815000 |
| H | 0.935000  | -1.728000 | -0.795000 |
| C | -0.321000 | -0.207000 | 0.026000  |
| H | -0.372000 | 0.884000  | 0.065000  |
| H | -0.227000 | -0.549000 | 1.062000  |
| C | -1.610000 | -0.756000 | -0.556000 |
| H | -1.518000 | -1.843000 | -0.653000 |
| H | -1.738000 | -0.368000 | -1.573000 |
| C | -2.846000 | -0.429000 | 0.265000  |
| H | -2.726000 | -0.841000 | 1.272000  |
| H | -3.710000 | -0.937000 | -0.173000 |
| C | -3.134000 | 1.059000  | 0.355000  |
| H | -3.226000 | 1.497000  | -0.643000 |
| H | -4.065000 | 1.252000  | 0.892000  |
| H | -2.336000 | 1.591000  | 0.877000  |
| C | 2.304000  | 1.415000  | -0.342000 |
| H | 2.064000  | 1.778000  | -1.344000 |
| H | 1.603000  | 1.875000  | 0.359000  |
| H | 3.304000  | 1.769000  | -0.084000 |

Total Energy: -315.603819653



2g

|   |           |           |           |
|---|-----------|-----------|-----------|
| C | 3.166000  | -0.047000 | -0.853000 |
| H | 3.797000  | -0.496000 | -0.080000 |
| H | 3.113000  | -0.749000 | -1.688000 |
| H | 3.662000  | 0.861000  | -1.202000 |
| C | 1.786000  | 0.254000  | -0.298000 |
| H | 1.194000  | 0.716000  | -1.096000 |
| C | 1.098000  | -1.039000 | 0.117000  |
| H | 1.045000  | -1.699000 | -0.756000 |
| H | 1.739000  | -1.548000 | 0.847000  |
| C | -0.294000 | -0.876000 | 0.701000  |
| H | -0.241000 | -0.329000 | 1.647000  |
| H | -0.691000 | -1.866000 | 0.949000  |
| C | -1.269000 | -0.175000 | -0.224000 |
| H | -1.279000 | -0.683000 | -1.196000 |
| H | -0.928000 | 0.847000  | -0.421000 |
| C | -2.679000 | -0.125000 | 0.331000  |
| H | -2.661000 | 0.372000  | 1.307000  |
| H | -3.028000 | -1.146000 | 0.516000  |
| C | -3.646000 | 0.590000  | -0.591000 |
| H | -3.696000 | 0.094000  | -1.564000 |
| H | -4.657000 | 0.616000  | -0.178000 |
| H | -3.329000 | 1.622000  | -0.764000 |
| C | 1.878000  | 1.237000  | 0.854000  |
| H | 0.893000  | 1.541000  | 1.212000  |
| H | 2.416000  | 0.789000  | 1.694000  |
| H | 2.418000  | 2.139000  | 0.555000  |

Total Energy: -315.605487439

2g3g

|   |           |           |           |
|---|-----------|-----------|-----------|
| C | 2.513000  | 1.350000  | -0.326000 |
| H | 3.316000  | 0.820000  | -0.846000 |
| H | 2.070000  | 2.057000  | -1.030000 |
| H | 2.962000  | 1.919000  | 0.491000  |
| C | 1.479000  | 0.365000  | 0.189000  |
| H | 0.701000  | 0.935000  | 0.712000  |
| C | 0.830000  | -0.367000 | -0.976000 |
| H | 0.411000  | 0.374000  | -1.663000 |
| H | 1.616000  | -0.887000 | -1.536000 |
| C | -0.246000 | -1.369000 | -0.587000 |
| H | 0.211000  | -2.211000 | -0.061000 |
| H | -0.683000 | -1.784000 | -1.502000 |
| C | -1.358000 | -0.789000 | 0.271000  |
| H | -0.954000 | -0.470000 | 1.238000  |
| H | -2.084000 | -1.578000 | 0.496000  |
| C | -2.083000 | 0.378000  | -0.369000 |
| H | -2.451000 | 0.075000  | -1.356000 |
| H | -1.380000 | 1.197000  | -0.545000 |
| C | -3.235000 | 0.876000  | 0.481000  |
| H | -2.881000 | 1.202000  | 1.463000  |
| H | -3.749000 | 1.720000  | 0.015000  |
| H | -3.971000 | 0.085000  | 0.645000  |
| C | 2.107000  | -0.597000 | 1.180000  |
| H | 1.367000  | -1.265000 | 1.625000  |
| H | 2.860000  | -1.216000 | 0.682000  |
| H | 2.602000  | -0.057000 | 1.990000  |

Total Energy: -315.605352812

2g3g4g

|   |           |           |           |
|---|-----------|-----------|-----------|
| C | -2.457000 | 1.396000  | -0.116000 |
| H | -3.031000 | 1.321000  | 0.812000  |
| H | -1.904000 | 2.337000  | -0.091000 |
| H | -3.168000 | 1.441000  | -0.945000 |
| C | -1.520000 | 0.210000  | -0.255000 |
| H | -0.975000 | 0.318000  | -1.199000 |
| C | -0.509000 | 0.210000  | 0.882000  |
| H | 0.011000  | 1.173000  | 0.885000  |
| H | -1.057000 | 0.159000  | 1.830000  |
| C | 0.511000  | -0.916000 | 0.837000  |
| H | 0.008000  | -1.874000 | 0.999000  |
| H | 1.201000  | -0.799000 | 1.677000  |
| C | 1.300000  | -0.987000 | -0.461000 |
| H | 0.630000  | -1.268000 | -1.280000 |
| H | 2.038000  | -1.792000 | -0.382000 |
| C | 2.015000  | 0.304000  | -0.826000 |
| H | 1.279000  | 1.094000  | -1.006000 |
| H | 2.540000  | 0.160000  | -1.775000 |
| C | 3.000000  | 0.762000  | 0.232000  |
| H | 3.731000  | -0.022000 | 0.449000  |
| H | 3.548000  | 1.649000  | -0.092000 |
| H | 2.495000  | 1.009000  | 1.168000  |
| C | -2.306000 | -1.087000 | -0.308000 |
| H | -1.661000 | -1.948000 | -0.490000 |
| H | -2.829000 | -1.253000 | 0.639000  |
| H | -3.056000 | -1.057000 | -1.102000 |

Total Energy: -315.605086932

2g4g

|   |           |           |           |
|---|-----------|-----------|-----------|
| C | 3.232000  | -0.312000 | -0.340000 |
| H | 3.681000  | -0.179000 | 0.648000  |
| H | 3.355000  | -1.360000 | -0.623000 |
| H | 3.795000  | 0.300000  | -1.048000 |
| C | 1.767000  | 0.082000  | -0.312000 |
| H | 1.361000  | -0.051000 | -1.321000 |
| C | 1.000000  | -0.833000 | 0.633000  |
| H | 1.130000  | -1.868000 | 0.296000  |
| H | 1.467000  | -0.772000 | 1.623000  |
| C | -0.483000 | -0.535000 | 0.759000  |
| H | -0.621000 | 0.449000  | 1.215000  |
| H | -0.933000 | -1.254000 | 1.452000  |
| C | -1.227000 | -0.598000 | -0.561000 |
| H | -0.989000 | -1.547000 | -1.055000 |
| H | -0.865000 | 0.192000  | -1.227000 |
| C | -2.734000 | -0.467000 | -0.417000 |
| H | -3.104000 | -1.268000 | 0.231000  |
| H | -3.202000 | -0.621000 | -1.394000 |
| C | -3.167000 | 0.878000  | 0.138000  |
| H | -2.781000 | 1.694000  | -0.479000 |
| H | -4.255000 | 0.966000  | 0.165000  |
| H | -2.799000 | 1.030000  | 1.154000  |
| C | 1.615000  | 1.542000  | 0.073000  |
| H | 0.578000  | 1.874000  | 0.011000  |
| H | 1.958000  | 1.702000  | 1.099000  |
| H | 2.211000  | 2.182000  | -0.582000 |

Total Energy: -315.604868728

3g

|   |           |           |           |
|---|-----------|-----------|-----------|
| C | -2.961000 | 1.253000  | -0.045000 |
| H | -2.765000 | 1.668000  | 0.949000  |
| H | -2.724000 | 2.025000  | -0.781000 |
| H | -4.030000 | 1.038000  | -0.109000 |
| C | -2.130000 | 0.003000  | -0.267000 |
| H | -2.355000 | -0.387000 | -1.268000 |
| C | -0.648000 | 0.340000  | -0.225000 |
| H | -0.450000 | 1.151000  | -0.935000 |
| H | -0.413000 | 0.740000  | 0.768000  |
| C | 0.269000  | -0.825000 | -0.546000 |
| H | -0.084000 | -1.307000 | -1.464000 |
| H | 0.201000  | -1.580000 | 0.244000  |
| C | 1.723000  | -0.421000 | -0.718000 |
| H | 1.803000  | 0.311000  | -1.530000 |
| H | 2.306000  | -1.293000 | -1.034000 |
| C | 2.353000  | 0.157000  | 0.535000  |
| H | 2.221000  | -0.551000 | 1.360000  |
| H | 1.823000  | 1.068000  | 0.828000  |
| C | 3.826000  | 0.466000  | 0.351000  |
| H | 3.974000  | 1.187000  | -0.457000 |
| H | 4.269000  | 0.884000  | 1.257000  |
| H | 4.384000  | -0.438000 | 0.091000  |
| C | -2.495000 | -1.062000 | 0.751000  |
| H | -1.972000 | -2.001000 | 0.566000  |
| H | -2.234000 | -0.725000 | 1.760000  |
| H | -3.568000 | -1.266000 | 0.735000  |

Total Energy: -315.605013100

3g4g

|   |           |           |           |
|---|-----------|-----------|-----------|
| C | -2.891000 | -0.509000 | -0.928000 |
| H | -2.631000 | 0.062000  | -1.824000 |
| H | -2.832000 | -1.571000 | -1.180000 |
| H | -3.927000 | -0.276000 | -0.673000 |
| C | -1.949000 | -0.159000 | 0.210000  |
| H | -2.240000 | -0.745000 | 1.091000  |
| C | -0.522000 | -0.539000 | -0.150000 |
| H | -0.501000 | -1.591000 | -0.458000 |
| H | -0.223000 | 0.041000  | -1.031000 |
| C | 0.482000  | -0.335000 | 0.968000  |
| H | 0.102000  | -0.811000 | 1.878000  |
| H | 0.570000  | 0.729000  | 1.198000  |
| C | 1.857000  | -0.900000 | 0.651000  |
| H | 1.780000  | -1.987000 | 0.544000  |
| H | 2.522000  | -0.718000 | 1.502000  |
| C | 2.495000  | -0.322000 | -0.603000 |
| H | 1.907000  | -0.608000 | -1.480000 |
| H | 3.480000  | -0.779000 | -0.738000 |
| C | 2.640000  | 1.187000  | -0.559000 |
| H | 3.196000  | 1.500000  | 0.329000  |
| H | 3.171000  | 1.562000  | -1.436000 |
| H | 1.666000  | 1.681000  | -0.528000 |
| C | -2.068000 | 1.314000  | 0.558000  |
| H | -1.463000 | 1.579000  | 1.426000  |
| H | -1.736000 | 1.928000  | -0.284000 |
| H | -3.104000 | 1.582000  | 0.777000  |

Total Energy: -315.604918714

4g

|   |           |           |           |
|---|-----------|-----------|-----------|
| C | 3.285000  | -0.746000 | -0.427000 |
| H | 3.551000  | -1.098000 | 0.577000  |
| H | 3.121000  | -1.629000 | -1.053000 |
| H | 4.150000  | -0.207000 | -0.827000 |
| C | 2.045000  | 0.144000  | -0.374000 |
| H | 1.815000  | 0.472000  | -1.399000 |
| C | 0.842000  | -0.653000 | 0.141000  |
| H | 0.749000  | -1.571000 | -0.456000 |
| H | 1.051000  | -0.984000 | 1.169000  |
| C | -0.489000 | 0.091000  | 0.107000  |
| H | -0.660000 | 0.486000  | -0.904000 |
| H | -0.452000 | 0.963000  | 0.771000  |
| C | -1.669000 | -0.787000 | 0.512000  |
| H | -1.491000 | -1.197000 | 1.516000  |
| H | -1.726000 | -1.656000 | -0.159000 |
| C | -3.005000 | -0.051000 | 0.498000  |
| H | -2.974000 | 0.766000  | 1.231000  |
| H | -3.796000 | -0.731000 | 0.838000  |
| C | -3.360000 | 0.505000  | -0.877000 |
| H | -3.427000 | -0.296000 | -1.621000 |
| H | -4.320000 | 1.030000  | -0.868000 |
| H | -2.600000 | 1.213000  | -1.225000 |
| C | 2.320000  | 1.385000  | 0.473000  |
| H | 1.484000  | 2.090000  | 0.460000  |
| H | 2.503000  | 1.105000  | 1.518000  |
| H | 3.206000  | 1.919000  | 0.114000  |

Total Energy: -315.604094973

3-ethylhexane

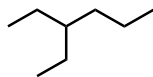

|   |           |           |           |
|---|-----------|-----------|-----------|
| C | 0.962000  | -2.550000 | 0.231000  |
| H | 1.362000  | -2.567000 | 1.249000  |
| H | -0.116000 | -2.707000 | 0.298000  |
| H | 1.385000  | -3.401000 | -0.307000 |
| C | 1.296000  | -1.243000 | -0.460000 |
| H | 2.375000  | -1.188000 | -0.636000 |
| H | 0.831000  | -1.221000 | -1.451000 |
| C | 0.879000  | 0.001000  | 0.314000  |
| H | 1.439000  | 0.002000  | 1.259000  |
| C | -0.600000 | -0.001000 | 0.680000  |
| H | -0.814000 | 0.870000  | 1.307000  |
| H | -0.812000 | -0.872000 | 1.307000  |
| C | -1.552000 | -0.002000 | -0.500000 |
| H | -1.361000 | -0.876000 | -1.129000 |
| H | -1.363000 | 0.873000  | -1.129000 |
| C | -3.002000 | -0.003000 | -0.057000 |
| H | -3.224000 | 0.878000  | 0.552000  |
| H | -3.687000 | -0.004000 | -0.907000 |
| H | -3.222000 | -0.885000 | 0.551000  |
| C | 1.293000  | 1.246000  | -0.460000 |
| H | 2.372000  | 1.193000  | -0.635000 |
| H | 0.828000  | 1.223000  | -1.451000 |
| C | 0.956000  | 2.552000  | 0.231000  |
| H | 1.356000  | 2.570000  | 1.249000  |
| H | 1.377000  | 3.404000  | -0.307000 |
| H | -0.123000 | 2.706000  | 0.298000  |

Total Energy: -315.604198881



1g

|   |           |           |           |
|---|-----------|-----------|-----------|
| C | 2.149000  | -1.921000 | -0.120000 |
| H | 2.104000  | -2.294000 | 0.907000  |
| H | 1.400000  | -2.461000 | -0.701000 |
| H | 3.128000  | -2.182000 | -0.527000 |
| C | 1.921000  | -0.422000 | -0.159000 |
| H | 2.760000  | 0.082000  | 0.332000  |
| H | 1.924000  | -0.081000 | -1.199000 |
| C | 0.630000  | 0.026000  | 0.514000  |
| H | 0.633000  | -0.389000 | 1.531000  |
| C | -0.592000 | -0.531000 | -0.200000 |
| H | -0.537000 | -1.623000 | -0.203000 |
| H | -0.567000 | -0.227000 | -1.253000 |
| C | -1.919000 | -0.120000 | 0.408000  |
| H | -2.045000 | 0.963000  | 0.332000  |
| H | -1.910000 | -0.351000 | 1.479000  |
| C | -3.093000 | -0.812000 | -0.258000 |
| H | -3.012000 | -1.898000 | -0.160000 |
| H | -4.045000 | -0.506000 | 0.179000  |
| H | -3.125000 | -0.580000 | -1.325000 |
| C | 0.583000  | 1.545000  | 0.656000  |
| H | -0.247000 | 1.820000  | 1.312000  |
| H | 1.494000  | 1.869000  | 1.170000  |
| C | 0.453000  | 2.297000  | -0.656000 |
| H | -0.478000 | 2.046000  | -1.169000 |
| H | 0.455000  | 3.375000  | -0.488000 |
| H | 1.276000  | 2.068000  | -1.335000 |

Total Energy: -315.603626610

1g2g

|   |           |           |           |
|---|-----------|-----------|-----------|
| C | 0.768000  | -2.493000 | -0.213000 |
| H | 1.195000  | -2.868000 | 0.721000  |
| H | -0.318000 | -2.564000 | -0.127000 |
| H | 1.081000  | -3.162000 | -1.016000 |
| C | 1.215000  | -1.067000 | -0.471000 |
| H | 2.303000  | -1.044000 | -0.589000 |
| H | 0.799000  | -0.715000 | -1.419000 |
| C | 0.831000  | -0.113000 | 0.650000  |
| H | 1.227000  | -0.551000 | 1.575000  |
| C | -0.684000 | -0.001000 | 0.843000  |
| H | -0.890000 | 0.877000  | 1.466000  |
| H | -1.033000 | -0.861000 | 1.424000  |
| C | -1.535000 | 0.076000  | -0.413000 |
| H | -1.417000 | -0.843000 | -0.994000 |
| H | -1.197000 | 0.886000  | -1.060000 |
| C | -3.002000 | 0.269000  | -0.076000 |
| H | -3.157000 | 1.203000  | 0.470000  |
| H | -3.623000 | 0.298000  | -0.974000 |
| H | -3.366000 | -0.545000 | 0.556000  |
| C | 1.527000  | 1.239000  | 0.514000  |
| H | 1.362000  | 1.806000  | 1.436000  |
| H | 2.605000  | 1.055000  | 0.459000  |
| C | 1.113000  | 2.097000  | -0.668000 |
| H | 0.085000  | 2.448000  | -0.568000 |
| H | 1.752000  | 2.980000  | -0.742000 |
| H | 1.192000  | 1.553000  | -1.611000 |

Total Energy: -315.600173497

1g2g4g

|   |           |           |           |
|---|-----------|-----------|-----------|
| C | -0.177000 | 2.491000  | 0.047000  |
| H | -0.468000 | 2.723000  | 1.075000  |
| H | 0.911000  | 2.402000  | 0.025000  |
| H | -0.451000 | 3.343000  | -0.578000 |
| C | -0.852000 | 1.220000  | -0.432000 |
| H | -1.926000 | 1.400000  | -0.519000 |
| H | -0.505000 | 0.972000  | -1.441000 |
| C | -0.627000 | 0.022000  | 0.480000  |
| H | -1.092000 | 0.257000  | 1.447000  |
| C | 0.851000  | -0.238000 | 0.751000  |
| H | 0.935000  | -1.111000 | 1.409000  |
| H | 1.271000  | 0.601000  | 1.314000  |
| C | 1.703000  | -0.471000 | -0.482000 |
| H | 1.651000  | 0.403000  | -1.137000 |
| H | 1.303000  | -1.310000 | -1.058000 |
| C | 3.151000  | -0.747000 | -0.123000 |
| H | 3.233000  | -1.636000 | 0.508000  |
| H | 3.765000  | -0.909000 | -1.011000 |
| H | 3.579000  | 0.091000  | 0.433000  |
| C | -1.316000 | -1.226000 | -0.059000 |
| H | -0.929000 | -1.449000 | -1.058000 |
| H | -1.038000 | -2.075000 | 0.574000  |
| C | -2.828000 | -1.120000 | -0.116000 |
| H | -3.155000 | -0.362000 | -0.829000 |
| H | -3.278000 | -2.068000 | -0.418000 |
| H | -3.236000 | -0.854000 | 0.863000  |

Total Energy: -315.603579245

1g3g

|   |           |           |           |
|---|-----------|-----------|-----------|
| C | -2.328000 | -1.632000 | 0.038000  |
| H | -2.037000 | -2.213000 | -0.842000 |
| H | -1.885000 | -2.112000 | 0.912000  |
| H | -3.412000 | -1.703000 | 0.140000  |
| C | -1.883000 | -0.188000 | -0.099000 |
| H | -2.442000 | 0.284000  | -0.914000 |
| H | -2.145000 | 0.360000  | 0.811000  |
| C | -0.395000 | -0.024000 | -0.377000 |
| H | -0.164000 | -0.646000 | -1.250000 |
| C | 0.442000  | -0.528000 | 0.791000  |
| H | 0.229000  | -1.590000 | 0.945000  |
| H | 0.118000  | -0.018000 | 1.704000  |
| C | 1.943000  | -0.359000 | 0.623000  |
| H | 2.440000  | -0.744000 | 1.519000  |
| H | 2.195000  | 0.704000  | 0.573000  |
| C | 2.491000  | -1.069000 | -0.600000 |
| H | 2.089000  | -0.646000 | -1.522000 |
| H | 3.579000  | -0.995000 | -0.649000 |
| H | 2.228000  | -2.130000 | -0.583000 |
| C | -0.059000 | 1.415000  | -0.755000 |
| H | 0.973000  | 1.463000  | -1.112000 |
| H | -0.686000 | 1.700000  | -1.606000 |
| C | -0.246000 | 2.422000  | 0.365000  |
| H | 0.402000  | 2.199000  | 1.215000  |
| H | -0.006000 | 3.431000  | 0.024000  |
| H | -1.275000 | 2.434000  | 0.727000  |

Total Energy: -315.603388630

1g3g4g

|   |           |           |           |
|---|-----------|-----------|-----------|
| C | 1.790000  | -2.074000 | 0.373000  |
| H | 1.455000  | -2.138000 | 1.412000  |
| H | 1.176000  | -2.757000 | -0.215000 |
| H | 2.818000  | -2.439000 | 0.332000  |
| C | 1.699000  | -0.646000 | -0.133000 |
| H | 2.450000  | -0.045000 | 0.384000  |
| H | 1.960000  | -0.612000 | -1.198000 |
| C | 0.334000  | 0.001000  | 0.052000  |
| H | 0.116000  | 0.002000  | 1.129000  |
| C | -0.748000 | -0.805000 | -0.654000 |
| H | -0.760000 | -1.817000 | -0.241000 |
| H | -0.469000 | -0.906000 | -1.710000 |
| C | -2.156000 | -0.240000 | -0.559000 |
| H | -2.839000 | -0.924000 | -1.072000 |
| H | -2.221000 | 0.708000  | -1.101000 |
| C | -2.624000 | -0.043000 | 0.871000  |
| H | -2.029000 | 0.714000  | 1.386000  |
| H | -3.668000 | 0.276000  | 0.908000  |
| H | -2.536000 | -0.972000 | 1.440000  |
| C | 0.338000  | 1.448000  | -0.419000 |
| H | 0.519000  | 1.464000  | -1.501000 |
| H | -0.659000 | 1.871000  | -0.273000 |
| C | 1.347000  | 2.336000  | 0.286000  |
| H | 2.374000  | 2.060000  | 0.047000  |
| H | 1.214000  | 3.382000  | 0.002000  |
| H | 1.229000  | 2.268000  | 1.371000  |

Total Energy: -315.603112713

1g4g

|   |           |           |           |
|---|-----------|-----------|-----------|
| C | 1.230000  | 2.447000  | -0.195000 |
| H | 1.133000  | 2.468000  | -1.284000 |
| H | 0.313000  | 2.861000  | 0.227000  |
| H | 2.047000  | 3.118000  | 0.079000  |
| C | 1.498000  | 1.036000  | 0.294000  |
| H | 2.499000  | 0.742000  | -0.027000 |
| H | 1.511000  | 1.019000  | 1.391000  |
| C | 0.497000  | -0.002000 | -0.194000 |
| H | 0.524000  | 0.001000  | -1.294000 |
| C | -0.918000 | 0.353000  | 0.236000  |
| H | -1.155000 | 1.362000  | -0.114000 |
| H | -0.954000 | 0.396000  | 1.332000  |
| C | -2.001000 | -0.583000 | -0.267000 |
| H | -1.880000 | -1.574000 | 0.175000  |
| H | -1.887000 | -0.713000 | -1.349000 |
| C | -3.391000 | -0.063000 | 0.044000  |
| H | -3.558000 | 0.910000  | -0.426000 |
| H | -4.167000 | -0.744000 | -0.311000 |
| H | -3.526000 | 0.065000  | 1.121000  |
| C | 0.881000  | -1.400000 | 0.273000  |
| H | 0.817000  | -1.431000 | 1.368000  |
| H | 0.139000  | -2.112000 | -0.095000 |
| C | 2.256000  | -1.859000 | -0.175000 |
| H | 3.055000  | -1.285000 | 0.295000  |
| H | 2.418000  | -2.910000 | 0.075000  |
| H | 2.365000  | -1.755000 | -1.258000 |

Total Energy: -315.603176865

2g

|   |           |           |           |
|---|-----------|-----------|-----------|
| C | -2.216000 | 1.711000  | -0.034000 |
| H | -3.008000 | 0.965000  | -0.123000 |
| H | -2.209000 | 2.061000  | 1.002000  |
| H | -2.486000 | 2.556000  | -0.670000 |
| C | -0.864000 | 1.143000  | -0.421000 |
| H | -0.906000 | 0.745000  | -1.440000 |
| H | -0.132000 | 1.954000  | -0.446000 |
| C | -0.359000 | 0.056000  | 0.518000  |
| H | -0.221000 | 0.515000  | 1.506000  |
| C | 0.995000  | -0.478000 | 0.074000  |
| H | 0.919000  | -0.867000 | -0.947000 |
| H | 1.260000  | -1.333000 | 0.706000  |
| C | 2.125000  | 0.533000  | 0.132000  |
| H | 2.163000  | 0.970000  | 1.136000  |
| H | 1.924000  | 1.359000  | -0.554000 |
| C | 3.466000  | -0.087000 | -0.209000 |
| H | 3.452000  | -0.512000 | -1.216000 |
| H | 4.274000  | 0.646000  | -0.167000 |
| H | 3.710000  | -0.896000 | 0.485000  |
| C | -1.366000 | -1.077000 | 0.694000  |
| H | -0.936000 | -1.813000 | 1.381000  |
| H | -2.261000 | -0.691000 | 1.188000  |
| C | -1.767000 | -1.768000 | -0.596000 |
| H | -0.903000 | -2.194000 | -1.110000 |
| H | -2.467000 | -2.583000 | -0.399000 |
| H | -2.255000 | -1.076000 | -1.285000 |

Total Energy: -315.603521872

2g3g

|   |           |           |           |
|---|-----------|-----------|-----------|
| C | -1.498000 | 2.072000  | 0.020000  |
| H | -2.481000 | 1.608000  | 0.126000  |
| H | -1.194000 | 2.427000  | 1.009000  |
| H | -1.613000 | 2.945000  | -0.626000 |
| C | -0.476000 | 1.103000  | -0.541000 |
| H | -0.818000 | 0.718000  | -1.508000 |
| H | 0.451000  | 1.645000  | -0.746000 |
| C | -0.166000 | -0.065000 | 0.382000  |
| H | 0.273000  | 0.351000  | 1.297000  |
| C | 0.855000  | -1.011000 | -0.235000 |
| H | 0.418000  | -1.481000 | -1.121000 |
| H | 1.048000  | -1.820000 | 0.479000  |
| C | 2.180000  | -0.375000 | -0.623000 |
| H | 2.028000  | 0.333000  | -1.442000 |
| H | 2.835000  | -1.155000 | -1.021000 |
| C | 2.875000  | 0.324000  | 0.531000  |
| H | 3.001000  | -0.356000 | 1.378000  |
| H | 3.863000  | 0.684000  | 0.240000  |
| H | 2.301000  | 1.184000  | 0.883000  |
| C | -1.420000 | -0.824000 | 0.810000  |
| H | -1.112000 | -1.659000 | 1.449000  |
| H | -2.035000 | -0.175000 | 1.439000  |
| C | -2.265000 | -1.352000 | -0.334000 |
| H | -1.698000 | -2.027000 | -0.979000 |
| H | -3.127000 | -1.906000 | 0.043000  |
| H | -2.644000 | -0.540000 | -0.958000 |

Total Energy: -315.603210846



2g3g4g

|   |           |           |           |
|---|-----------|-----------|-----------|
| C | -1.346000 | 2.336000  | 0.286000  |
| H | -2.374000 | 2.060000  | 0.047000  |
| H | -1.228000 | 2.268000  | 1.371000  |
| H | -1.214000 | 3.382000  | 0.002000  |
| C | -0.338000 | 1.448000  | -0.420000 |
| H | -0.520000 | 1.464000  | -1.501000 |
| H | 0.659000  | 1.871000  | -0.274000 |
| C | -0.334000 | 0.001000  | 0.052000  |
| H | -0.116000 | 0.002000  | 1.128000  |
| C | 0.748000  | -0.805000 | -0.654000 |
| H | 0.469000  | -0.906000 | -1.710000 |
| H | 0.760000  | -1.817000 | -0.241000 |
| C | 2.156000  | -0.240000 | -0.559000 |
| H | 2.221000  | 0.707000  | -1.101000 |
| H | 2.839000  | -0.924000 | -1.072000 |
| C | 2.624000  | -0.043000 | 0.871000  |
| H | 2.536000  | -0.972000 | 1.440000  |
| H | 3.668000  | 0.275000  | 0.908000  |
| H | 2.029000  | 0.714000  | 1.385000  |
| C | -1.699000 | -0.646000 | -0.133000 |
| H | -2.450000 | -0.045000 | 0.384000  |
| H | -1.960000 | -0.613000 | -1.198000 |
| C | -1.790000 | -2.073000 | 0.373000  |
| H | -1.454000 | -2.138000 | 1.412000  |
| H | -2.818000 | -2.439000 | 0.333000  |
| H | -1.176000 | -2.757000 | -0.215000 |

Total Energy: -315.603112699

2g4g

|   |           |           |           |
|---|-----------|-----------|-----------|
| C | 2.256000  | -1.860000 | 0.176000  |
| H | 3.055000  | -1.285000 | -0.294000 |
| H | 2.364000  | -1.756000 | 1.259000  |
| H | 2.417000  | -2.910000 | -0.075000 |
| C | 0.881000  | -1.400000 | -0.274000 |
| H | 0.818000  | -1.431000 | -1.368000 |
| H | 0.139000  | -2.111000 | 0.095000  |
| C | 0.497000  | -0.002000 | 0.194000  |
| H | 0.524000  | 0.001000  | 1.293000  |
| C | -0.918000 | 0.353000  | -0.236000 |
| H | -0.954000 | 0.395000  | -1.333000 |
| H | -1.155000 | 1.362000  | 0.113000  |
| C | -2.001000 | -0.582000 | 0.267000  |
| H | -1.887000 | -0.712000 | 1.350000  |
| H | -1.880000 | -1.574000 | -0.175000 |
| C | -3.391000 | -0.063000 | -0.044000 |
| H | -3.526000 | 0.065000  | -1.121000 |
| H | -4.167000 | -0.743000 | 0.312000  |
| H | -3.558000 | 0.911000  | 0.425000  |
| C | 1.498000  | 1.036000  | -0.295000 |
| H | 2.499000  | 0.741000  | 0.026000  |
| H | 1.510000  | 1.020000  | -1.391000 |
| C | 1.230000  | 2.447000  | 0.195000  |
| H | 1.134000  | 2.468000  | 1.284000  |
| H | 2.047000  | 3.118000  | -0.079000 |
| H | 0.313000  | 2.861000  | -0.226000 |

Total Energy: -315.603176869

3-methylheptane

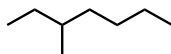

|   |           |           |           |
|---|-----------|-----------|-----------|
| C | 3.631000  | -0.309000 | 0.355000  |
| H | 3.929000  | 0.671000  | -0.019000 |
| H | 3.585000  | -0.249000 | 1.446000  |
| H | 4.424000  | -1.013000 | 0.094000  |
| C | 2.298000  | -0.750000 | -0.217000 |
| H | 2.097000  | -1.782000 | 0.090000  |
| H | 2.349000  | -0.762000 | -1.312000 |
| C | 1.117000  | 0.114000  | 0.203000  |
| H | 1.087000  | 0.128000  | 1.301000  |
| C | -0.181000 | -0.507000 | -0.290000 |
| H | -0.171000 | -0.521000 | -1.387000 |
| H | -0.208000 | -1.556000 | 0.025000  |
| C | -1.443000 | 0.178000  | 0.192000  |
| H | -1.416000 | 0.263000  | 1.285000  |
| H | -1.488000 | 1.202000  | -0.191000 |
| C | -2.704000 | -0.554000 | -0.222000 |
| H | -2.673000 | -1.575000 | 0.172000  |
| H | -2.721000 | -0.650000 | -1.313000 |
| C | -3.966000 | 0.140000  | 0.252000  |
| H | -4.865000 | -0.400000 | -0.052000 |
| H | -3.978000 | 0.224000  | 1.342000  |
| H | -4.030000 | 1.152000  | -0.156000 |
| C | 1.272000  | 1.543000  | -0.285000 |
| H | 1.297000  | 1.566000  | -1.380000 |
| H | 0.444000  | 2.172000  | 0.043000  |
| H | 2.193000  | 1.997000  | 0.081000  |

Total Energy: -315.604811241

1g

|   |           |           |           |
|---|-----------|-----------|-----------|
| C | 2.935000  | -0.989000 | -0.611000 |
| H | 2.205000  | -1.696000 | -1.010000 |
| H | 3.139000  | -0.247000 | -1.385000 |
| H | 3.861000  | -1.539000 | -0.432000 |
| C | 2.439000  | -0.338000 | 0.668000  |
| H | 3.219000  | 0.322000  | 1.060000  |
| H | 2.280000  | -1.112000 | 1.426000  |
| C | 1.152000  | 0.467000  | 0.518000  |
| H | 0.917000  | 0.874000  | 1.510000  |
| C | -0.016000 | -0.417000 | 0.107000  |
| H | 0.145000  | -0.782000 | -0.913000 |
| H | -0.033000 | -1.304000 | 0.751000  |
| C | -1.368000 | 0.265000  | 0.177000  |
| H | -1.513000 | 0.682000  | 1.181000  |
| H | -1.396000 | 1.115000  | -0.512000 |
| C | -2.518000 | -0.669000 | -0.149000 |
| H | -2.499000 | -1.516000 | 0.545000  |
| H | -2.364000 | -1.091000 | -1.148000 |
| C | -3.867000 | 0.020000  | -0.084000 |
| H | -4.683000 | -0.666000 | -0.320000 |
| H | -4.049000 | 0.426000  | 0.914000  |
| H | -3.914000 | 0.852000  | -0.791000 |
| C | 1.333000  | 1.639000  | -0.431000 |
| H | 1.453000  | 1.293000  | -1.461000 |
| H | 0.474000  | 2.310000  | -0.408000 |
| H | 2.219000  | 2.222000  | -0.168000 |

Total Energy: -315.603941424



1g2g3g

|   |           |           |           |
|---|-----------|-----------|-----------|
| C | 1.929000  | 1.687000  | 0.357000  |
| H | 1.303000  | 1.727000  | 1.251000  |
| H | 2.892000  | 1.262000  | 0.646000  |
| H | 2.107000  | 2.715000  | 0.035000  |
| C | 1.271000  | 0.881000  | -0.747000 |
| H | 1.897000  | 0.917000  | -1.644000 |
| H | 0.324000  | 1.354000  | -1.020000 |
| C | 1.016000  | -0.582000 | -0.398000 |
| H | 0.480000  | -1.021000 | -1.247000 |
| C | 0.146000  | -0.747000 | 0.841000  |
| H | -0.057000 | -1.815000 | 0.977000  |
| H | 0.719000  | -0.436000 | 1.719000  |
| C | -1.172000 | 0.006000  | 0.806000  |
| H | -1.711000 | -0.176000 | 1.742000  |
| H | -0.985000 | 1.085000  | 0.774000  |
| C | -2.069000 | -0.374000 | -0.356000 |
| H | -2.218000 | -1.460000 | -0.353000 |
| H | -1.569000 | -0.139000 | -1.300000 |
| C | -3.409000 | 0.332000  | -0.304000 |
| H | -4.046000 | 0.056000  | -1.147000 |
| H | -3.944000 | 0.085000  | 0.617000  |
| H | -3.277000 | 1.417000  | -0.326000 |
| C | 2.312000  | -1.354000 | -0.229000 |
| H | 2.880000  | -0.987000 | 0.629000  |
| H | 2.113000  | -2.414000 | -0.059000 |
| H | 2.946000  | -1.265000 | -1.115000 |

Total Energy: -315.604417988

1g2g

|   |           |           |           |
|---|-----------|-----------|-----------|
| C | -1.809000 | 1.697000  | -0.602000 |
| H | -0.855000 | 1.737000  | -1.132000 |
| H | -2.547000 | 1.267000  | -1.282000 |
| H | -2.113000 | 2.725000  | -0.396000 |
| C | -1.697000 | 0.898000  | 0.683000  |
| H | -2.647000 | 0.947000  | 1.225000  |
| H | -0.953000 | 1.367000  | 1.333000  |
| C | -1.335000 | -0.572000 | 0.485000  |
| H | -1.182000 | -0.998000 | 1.484000  |
| C | -0.041000 | -0.761000 | -0.292000 |
| H | 0.171000  | -1.834000 | -0.358000 |
| H | -0.185000 | -0.423000 | -1.324000 |
| C | 1.161000  | -0.057000 | 0.304000  |
| H | 1.002000  | 1.027000  | 0.295000  |
| H | 1.263000  | -0.339000 | 1.359000  |
| C | 2.451000  | -0.370000 | -0.427000 |
| H | 2.339000  | -0.100000 | -1.483000 |
| H | 2.622000  | -1.452000 | -0.408000 |
| C | 3.648000  | 0.350000  | 0.162000  |
| H | 4.569000  | 0.112000  | -0.374000 |
| H | 3.508000  | 1.433000  | 0.124000  |
| H | 3.790000  | 0.074000  | 1.210000  |
| C | -2.464000 | -1.340000 | -0.180000 |
| H | -2.639000 | -0.979000 | -1.196000 |
| H | -2.224000 | -2.403000 | -0.247000 |
| H | -3.397000 | -1.237000 | 0.379000  |

Total Energy: -315.604620490

1g2g3g4g

|   |           |           |           |
|---|-----------|-----------|-----------|
| C | -2.407000 | -1.224000 | 0.125000  |
| H | -1.865000 | -1.644000 | 0.974000  |
| H | -3.149000 | -0.526000 | 0.517000  |
| H | -2.947000 | -2.042000 | -0.357000 |
| C | -1.466000 | -0.548000 | -0.855000 |
| H | -2.035000 | -0.202000 | -1.724000 |
| H | -0.754000 | -1.286000 | -1.235000 |
| C | -0.698000 | 0.639000  | -0.281000 |
| H | -0.015000 | 0.983000  | -1.066000 |
| C | 0.137000  | 0.266000  | 0.935000  |
| H | 0.689000  | 1.154000  | 1.258000  |
| H | -0.533000 | 0.019000  | 1.764000  |
| C | 1.104000  | -0.885000 | 0.716000  |
| H | 1.678000  | -1.041000 | 1.636000  |
| H | 0.542000  | -1.808000 | 0.549000  |
| C | 2.074000  | -0.677000 | -0.437000 |
| H | 1.520000  | -0.626000 | -1.379000 |
| H | 2.722000  | -1.554000 | -0.515000 |
| C | 2.926000  | 0.568000  | -0.284000 |
| H | 3.660000  | 0.650000  | -1.088000 |
| H | 2.317000  | 1.474000  | -0.301000 |
| H | 3.470000  | 0.555000  | 0.665000  |
| C | -1.622000 | 1.795000  | 0.057000  |
| H | -2.306000 | 1.529000  | 0.866000  |
| H | -1.051000 | 2.666000  | 0.386000  |
| H | -2.223000 | 2.090000  | -0.807000 |

Total Energy: -315.604167200



2g

|   |           |           |           |
|---|-----------|-----------|-----------|
| C | -3.001000 | -1.362000 | -0.096000 |
| H | -3.798000 | -0.674000 | 0.190000  |
| H | -3.026000 | -1.465000 | -1.184000 |
| H | -3.238000 | -2.337000 | 0.335000  |
| C | -1.641000 | -0.876000 | 0.367000  |
| H | -0.902000 | -1.658000 | 0.177000  |
| H | -1.652000 | -0.720000 | 1.453000  |
| C | -1.182000 | 0.414000  | -0.299000 |
| H | -1.134000 | 0.231000  | -1.381000 |
| C | 0.208000  | 0.821000  | 0.165000  |
| H | 0.459000  | 1.784000  | -0.293000 |
| H | 0.181000  | 0.999000  | 1.247000  |
| C | 1.311000  | -0.168000 | -0.156000 |
| H | 1.150000  | -1.106000 | 0.384000  |
| H | 1.275000  | -0.420000 | -1.223000 |
| C | 2.691000  | 0.361000  | 0.186000  |
| H | 2.718000  | 0.628000  | 1.248000  |
| H | 2.866000  | 1.290000  | -0.365000 |
| C | 3.792000  | -0.635000 | -0.122000 |
| H | 4.778000  | -0.238000 | 0.127000  |
| H | 3.651000  | -1.559000 | 0.444000  |
| H | 3.794000  | -0.897000 | -1.183000 |
| C | -2.161000 | 1.548000  | -0.051000 |
| H | -2.276000 | 1.721000  | 1.023000  |
| H | -1.802000 | 2.476000  | -0.501000 |
| H | -3.147000 | 1.337000  | -0.464000 |

Total Energy: -315.604635606

2g3g

|   |           |           |           |
|---|-----------|-----------|-----------|
| C | 2.367000  | 1.713000  | -0.064000 |
| H | 3.341000  | 1.224000  | -0.112000 |
| H | 2.084000  | 1.989000  | -1.084000 |
| H | 2.490000  | 2.635000  | 0.508000  |
| C | 1.315000  | 0.817000  | 0.561000  |
| H | 0.399000  | 1.395000  | 0.707000  |
| H | 1.640000  | 0.501000  | 1.559000  |
| C | 0.993000  | -0.423000 | -0.259000 |
| H | 0.627000  | -0.089000 | -1.238000 |
| C | -0.095000 | -1.262000 | 0.398000  |
| H | -0.301000 | -2.123000 | -0.247000 |
| H | 0.305000  | -1.671000 | 1.333000  |
| C | -1.400000 | -0.540000 | 0.685000  |
| H | -2.108000 | -1.253000 | 1.121000  |
| H | -1.248000 | 0.230000  | 1.448000  |
| C | -2.035000 | 0.092000  | -0.539000 |
| H | -2.134000 | -0.666000 | -1.324000 |
| H | -1.370000 | 0.862000  | -0.942000 |
| C | -3.389000 | 0.702000  | -0.236000 |
| H | -3.835000 | 1.161000  | -1.121000 |
| H | -4.084000 | -0.056000 | 0.136000  |
| H | -3.304000 | 1.474000  | 0.534000  |
| C | 2.224000  | -1.281000 | -0.488000 |
| H | 2.664000  | -1.579000 | 0.469000  |
| H | 1.966000  | -2.192000 | -1.033000 |
| H | 2.990000  | -0.756000 | -1.060000 |

Total Energy: -315.604560445

2g3g4g

|   |           |           |           |
|---|-----------|-----------|-----------|
| C | -2.619000 | -1.224000 | -0.482000 |
| H | -3.406000 | -0.477000 | -0.593000 |
| H | -2.231000 | -1.448000 | -1.480000 |
| H | -3.080000 | -2.134000 | -0.093000 |
| C | -1.507000 | -0.740000 | 0.430000  |
| H | -0.813000 | -1.565000 | 0.610000  |
| H | -1.919000 | -0.467000 | 1.409000  |
| C | -0.732000 | 0.449000  | -0.117000 |
| H | -0.303000 | 0.151000  | -1.081000 |
| C | 0.406000  | 0.848000  | 0.811000  |
| H | 0.918000  | 1.713000  | 0.377000  |
| H | -0.024000 | 1.198000  | 1.756000  |
| C | 1.424000  | -0.243000 | 1.104000  |
| H | 2.228000  | 0.186000  | 1.712000  |
| H | 0.965000  | -1.022000 | 1.718000  |
| C | 2.031000  | -0.878000 | -0.137000 |
| H | 1.253000  | -1.403000 | -0.699000 |
| H | 2.748000  | -1.644000 | 0.174000  |
| C | 2.723000  | 0.123000  | -1.043000 |
| H | 3.207000  | -0.372000 | -1.887000 |
| H | 2.016000  | 0.850000  | -1.447000 |
| H | 3.489000  | 0.678000  | -0.496000 |
| C | -1.635000 | 1.646000  | -0.357000 |
| H | -2.134000 | 1.938000  | 0.572000  |
| H | -1.056000 | 2.503000  | -0.708000 |
| H | -2.405000 | 1.437000  | -1.101000 |

Total Energy: -315.604390441

2g4g

|   |           |           |           |
|---|-----------|-----------|-----------|
| C | -3.110000 | -1.062000 | 0.128000  |
| H | -3.734000 | -0.267000 | 0.540000  |
| H | -3.318000 | -1.125000 | -0.943000 |
| H | -3.431000 | -2.000000 | 0.585000  |
| C | -1.635000 | -0.808000 | 0.376000  |
| H | -1.068000 | -1.690000 | 0.068000  |
| H | -1.455000 | -0.686000 | 1.451000  |
| C | -1.085000 | 0.413000  | -0.345000 |
| H | -1.229000 | 0.256000  | -1.423000 |
| C | 0.407000  | 0.582000  | -0.097000 |
| H | 0.742000  | 1.500000  | -0.593000 |
| H | 0.563000  | 0.743000  | 0.976000  |
| C | 1.267000  | -0.570000 | -0.581000 |
| H | 1.079000  | -1.460000 | 0.028000  |
| H | 0.969000  | -0.827000 | -1.604000 |
| C | 2.755000  | -0.264000 | -0.552000 |
| H | 2.955000  | 0.603000  | -1.191000 |
| H | 3.302000  | -1.103000 | -0.993000 |
| C | 3.285000  | 0.002000  | 0.844000  |
| H | 4.366000  | 0.153000  | 0.838000  |
| H | 2.830000  | 0.892000  | 1.282000  |
| H | 3.068000  | -0.841000 | 1.507000  |
| C | -1.821000 | 1.678000  | 0.056000  |
| H | -1.747000 | 1.834000  | 1.136000  |
| H | -1.389000 | 2.552000  | -0.437000 |
| H | -2.879000 | 1.638000  | -0.206000 |

Total Energy: -315.603987075

4g

|   |           |           |           |
|---|-----------|-----------|-----------|
| C | -3.417000 | -0.751000 | -0.240000 |
| H | -3.899000 | 0.189000  | 0.034000  |
| H | -3.394000 | -0.807000 | -1.332000 |
| H | -4.052000 | -1.561000 | 0.122000  |
| C | -2.017000 | -0.854000 | 0.333000  |
| H | -1.621000 | -1.857000 | 0.139000  |
| H | -2.054000 | -0.747000 | 1.424000  |
| C | -1.032000 | 0.166000  | -0.221000 |
| H | -1.008000 | 0.047000  | -1.313000 |
| C | 0.365000  | -0.124000 | 0.308000  |
| H | 0.370000  | 0.030000  | 1.395000  |
| H | 0.576000  | -1.186000 | 0.150000  |
| C | 1.467000  | 0.706000  | -0.320000 |
| H | 1.445000  | 0.567000  | -1.407000 |
| H | 1.275000  | 1.767000  | -0.140000 |
| C | 2.855000  | 0.367000  | 0.199000  |
| H | 2.874000  | 0.500000  | 1.286000  |
| H | 3.572000  | 1.086000  | -0.209000 |
| C | 3.309000  | -1.039000 | -0.149000 |
| H | 4.335000  | -1.217000 | 0.180000  |
| H | 2.679000  | -1.796000 | 0.321000  |
| H | 3.272000  | -1.201000 | -1.230000 |
| C | -1.468000 | 1.585000  | 0.095000  |
| H | -1.507000 | 1.734000  | 1.178000  |
| H | -0.779000 | 2.321000  | -0.321000 |
| H | -2.458000 | 1.801000  | -0.309000 |

Total Energy: -315.603865456

4-methylheptane 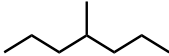

|   |           |           |           |
|---|-----------|-----------|-----------|
| C | 0.449000  | -0.580000 | 3.740000  |
| H | -0.289000 | -1.382000 | 3.822000  |
| H | 1.431000  | -1.048000 | 3.633000  |
| H | 0.443000  | -0.024000 | 4.680000  |
| C | 0.144000  | 0.315000  | 2.554000  |
| H | 0.883000  | 1.121000  | 2.498000  |
| H | -0.825000 | 0.797000  | 2.706000  |
| C | 0.144000  | -0.450000 | 1.245000  |
| H | 1.090000  | -0.996000 | 1.159000  |
| H | -0.645000 | -1.213000 | 1.270000  |
| C | -0.040000 | 0.404000  | -0.000000 |
| H | 0.748000  | 1.170000  | -0.000000 |
| C | 0.144000  | -0.450000 | -1.245000 |
| H | -0.645000 | -1.213000 | -1.270000 |
| H | 1.090000  | -0.996000 | -1.159000 |
| C | 0.144000  | 0.315000  | -2.554000 |
| H | 0.883000  | 1.121000  | -2.498000 |
| H | -0.825000 | 0.797000  | -2.706000 |
| C | 0.449000  | -0.580000 | -3.740000 |
| H | -0.289000 | -1.382000 | -3.822000 |
| H | 0.443000  | -0.024000 | -4.680000 |
| H | 1.431000  | -1.048000 | -3.633000 |
| C | -1.385000 | 1.107000  | 0.000000  |
| H | -1.509000 | 1.740000  | -0.879000 |
| H | -2.195000 | 0.369000  | 0.000000  |
| H | -1.509000 | 1.740000  | 0.879000  |

Total Energy: -315.604716351

1g

|   |           |           |           |
|---|-----------|-----------|-----------|
| C | -3.029000 | -0.346000 | 1.013000  |
| H | -2.824000 | -1.354000 | 1.386000  |
| H | -2.459000 | 0.353000  | 1.628000  |
| H | -4.089000 | -0.139000 | 1.174000  |
| C | -2.658000 | -0.227000 | -0.453000 |
| H | -2.836000 | 0.796000  | -0.795000 |
| H | -3.322000 | -0.862000 | -1.048000 |
| C | -1.221000 | -0.626000 | -0.742000 |
| H | -1.098000 | -1.692000 | -0.520000 |
| H | -1.023000 | -0.512000 | -1.815000 |
| C | -0.158000 | 0.149000  | 0.025000  |
| H | -0.302000 | -0.037000 | 1.096000  |
| C | 1.221000  | -0.374000 | -0.346000 |
| H | 1.409000  | -0.158000 | -1.406000 |
| H | 1.218000  | -1.466000 | -0.256000 |
| C | 2.361000  | 0.178000  | 0.488000  |
| H | 2.140000  | 0.013000  | 1.548000  |
| H | 2.433000  | 1.260000  | 0.354000  |
| C | 3.690000  | -0.461000 | 0.136000  |
| H | 3.936000  | -0.292000 | -0.916000 |
| H | 4.506000  | -0.057000 | 0.739000  |
| H | 3.659000  | -1.542000 | 0.295000  |
| C | -0.277000 | 1.642000  | -0.220000 |
| H | 0.484000  | 2.201000  | 0.326000  |
| H | -0.158000 | 1.861000  | -1.285000 |
| H | -1.250000 | 2.024000  | 0.093000  |

Total Energy: -315.604517069

1g2g

|   |           |           |           |
|---|-----------|-----------|-----------|
| C | -2.482000 | -0.749000 | -1.057000 |
| H | -3.105000 | 0.145000  | -1.136000 |
| H | -1.630000 | -0.617000 | -1.725000 |
| H | -3.061000 | -1.596000 | -1.431000 |
| C | -2.043000 | -0.985000 | 0.377000  |
| H | -1.330000 | -1.814000 | 0.407000  |
| H | -2.908000 | -1.318000 | 0.958000  |
| C | -1.450000 | 0.221000  | 1.092000  |
| H | -2.203000 | 1.016000  | 1.130000  |
| H | -1.268000 | -0.075000 | 2.131000  |
| C | -0.148000 | 0.806000  | 0.542000  |
| H | 0.266000  | 1.426000  | 1.348000  |
| C | 0.874000  | -0.280000 | 0.250000  |
| H | 0.532000  | -0.882000 | -0.600000 |
| H | 0.922000  | -0.963000 | 1.106000  |
| C | 2.269000  | 0.237000  | -0.042000 |
| H | 2.591000  | 0.884000  | 0.781000  |
| H | 2.252000  | 0.865000  | -0.937000 |
| C | 3.270000  | -0.887000 | -0.233000 |
| H | 2.975000  | -1.532000 | -1.065000 |
| H | 4.271000  | -0.506000 | -0.445000 |
| H | 3.331000  | -1.511000 | 0.662000  |
| C | -0.357000 | 1.730000  | -0.649000 |
| H | 0.546000  | 2.304000  | -0.863000 |
| H | -0.617000 | 1.178000  | -1.552000 |
| H | -1.161000 | 2.442000  | -0.450000 |

Total Energy: -315.600357817



1g2g3g

|   |           |           |           |
|---|-----------|-----------|-----------|
| C | -2.251000 | -1.179000 | -0.846000 |
| H | -3.152000 | -0.633000 | -0.555000 |
| H | -1.780000 | -0.628000 | -1.660000 |
| H | -2.560000 | -2.148000 | -1.244000 |
| C | -1.314000 | -1.354000 | 0.335000  |
| H | -0.377000 | -1.801000 | -0.012000 |
| H | -1.750000 | -2.084000 | 1.023000  |
| C | -1.015000 | -0.096000 | 1.137000  |
| H | -1.955000 | 0.302000  | 1.534000  |
| H | -0.425000 | -0.395000 | 2.008000  |
| C | -0.274000 | 1.040000  | 0.426000  |
| H | 0.129000  | 1.681000  | 1.220000  |
| C | 0.911000  | 0.548000  | -0.389000 |
| H | 1.370000  | 1.405000  | -0.895000 |
| H | 0.556000  | -0.114000 | -1.187000 |
| C | 1.972000  | -0.166000 | 0.425000  |
| H | 1.536000  | -1.037000 | 0.921000  |
| H | 2.314000  | 0.499000  | 1.225000  |
| C | 3.151000  | -0.602000 | -0.422000 |
| H | 3.623000  | 0.257000  | -0.907000 |
| H | 3.913000  | -1.110000 | 0.173000  |
| H | 2.830000  | -1.288000 | -1.210000 |
| C | -1.184000 | 1.916000  | -0.419000 |
| H | -0.644000 | 2.798000  | -0.772000 |
| H | -1.559000 | 1.389000  | -1.297000 |
| H | -2.047000 | 2.259000  | 0.157000  |

Total Energy: -315.601112983

1g2g3g4g

|   |           |           |           |
|---|-----------|-----------|-----------|
| C | -2.695000 | -0.634000 | -0.484000 |
| H | -3.287000 | -0.037000 | 0.214000  |
| H | -2.403000 | 0.017000  | -1.309000 |
| H | -3.344000 | -1.409000 | -0.896000 |
| C | -1.491000 | -1.249000 | 0.206000  |
| H | -0.853000 | -1.730000 | -0.541000 |
| H | -1.838000 | -2.056000 | 0.859000  |
| C | -0.659000 | -0.302000 | 1.059000  |
| H | -1.301000 | 0.131000  | 1.834000  |
| H | 0.083000  | -0.906000 | 1.591000  |
| C | 0.078000  | 0.836000  | 0.354000  |
| H | 0.812000  | 1.211000  | 1.076000  |
| C | 0.844000  | 0.364000  | -0.872000 |
| H | 1.360000  | 1.227000  | -1.311000 |
| H | 0.129000  | 0.024000  | -1.628000 |
| C | 1.863000  | -0.732000 | -0.607000 |
| H | 2.330000  | -1.014000 | -1.555000 |
| H | 1.355000  | -1.630000 | -0.242000 |
| C | 2.939000  | -0.327000 | 0.382000  |
| H | 2.524000  | -0.144000 | 1.375000  |
| H | 3.699000  | -1.105000 | 0.482000  |
| H | 3.440000  | 0.591000  | 0.060000  |
| C | -0.812000 | 2.018000  | 0.003000  |
| H | -0.206000 | 2.865000  | -0.327000 |
| H | -1.508000 | 1.781000  | -0.801000 |
| H | -1.398000 | 2.340000  | 0.867000  |

Total Energy: -315.600565946

2g

|   |           |           |           |
|---|-----------|-----------|-----------|
| C | 3.515000  | -0.884000 | 0.114000  |
| H | 4.101000  | -0.069000 | -0.318000 |
| H | 3.626000  | -0.828000 | 1.200000  |
| H | 3.955000  | -1.826000 | -0.218000 |
| C | 2.056000  | -0.773000 | -0.285000 |
| H | 1.503000  | -1.621000 | 0.128000  |
| H | 1.963000  | -0.846000 | -1.374000 |
| C | 1.434000  | 0.529000  | 0.180000  |
| H | 1.448000  | 0.568000  | 1.277000  |
| H | 2.066000  | 1.358000  | -0.158000 |
| C | 0.012000  | 0.778000  | -0.302000 |
| H | 0.017000  | 0.725000  | -1.399000 |
| C | -0.947000 | -0.287000 | 0.209000  |
| H | -0.928000 | -0.280000 | 1.306000  |
| H | -0.586000 | -1.274000 | -0.095000 |
| C | -2.378000 | -0.136000 | -0.271000 |
| H | -2.382000 | -0.048000 | -1.363000 |
| H | -2.804000 | 0.794000  | 0.113000  |
| C | -3.249000 | -1.302000 | 0.154000  |
| H | -3.267000 | -1.397000 | 1.243000  |
| H | -4.279000 | -1.183000 | -0.187000 |
| H | -2.867000 | -2.243000 | -0.251000 |
| C | -0.433000 | 2.171000  | 0.106000  |
| H | -1.405000 | 2.431000  | -0.315000 |
| H | -0.509000 | 2.242000  | 1.195000  |
| H | 0.287000  | 2.922000  | -0.227000 |

Total Energy: -315.604609279

2g3g

|   |           |           |           |
|---|-----------|-----------|-----------|
| C | -3.081000 | -1.106000 | -0.261000 |
| H | -3.828000 | -0.310000 | -0.303000 |
| H | -2.866000 | -1.408000 | -1.289000 |
| H | -3.529000 | -1.960000 | 0.252000  |
| C | -1.820000 | -0.629000 | 0.434000  |
| H | -1.105000 | -1.454000 | 0.496000  |
| H | -2.049000 | -0.346000 | 1.468000  |
| C | -1.183000 | 0.549000  | -0.275000 |
| H | -0.889000 | 0.248000  | -1.287000 |
| H | -1.935000 | 1.335000  | -0.406000 |
| C | 0.019000  | 1.145000  | 0.443000  |
| H | -0.332000 | 1.516000  | 1.413000  |
| C | 1.107000  | 0.116000  | 0.732000  |
| H | 0.734000  | -0.615000 | 1.456000  |
| H | 1.944000  | 0.624000  | 1.223000  |
| C | 1.630000  | -0.629000 | -0.482000 |
| H | 1.993000  | 0.082000  | -1.228000 |
| H | 0.813000  | -1.181000 | -0.956000 |
| C | 2.743000  | -1.593000 | -0.116000 |
| H | 2.395000  | -2.329000 | 0.613000  |
| H | 3.112000  | -2.135000 | -0.989000 |
| H | 3.587000  | -1.062000 | 0.331000  |
| C | 0.562000  | 2.329000  | -0.337000 |
| H | 1.414000  | 2.784000  | 0.175000  |
| H | 0.893000  | 2.026000  | -1.333000 |
| H | -0.205000 | 3.096000  | -0.467000 |

Total Energy: -315.604600611

2g3g4g

|   |           |           |           |
|---|-----------|-----------|-----------|
| C | 3.041000  | 0.208000  | -0.219000 |
| H | 3.478000  | -0.691000 | -0.661000 |
| H | 2.832000  | 0.905000  | -1.035000 |
| H | 3.794000  | 0.665000  | 0.426000  |
| C | 1.773000  | -0.123000 | 0.542000  |
| H | 1.365000  | 0.790000  | 0.984000  |
| H | 2.004000  | -0.790000 | 1.380000  |
| C | 0.730000  | -0.782000 | -0.338000 |
| H | 0.523000  | -0.148000 | -1.207000 |
| H | 1.150000  | -1.709000 | -0.744000 |
| C | -0.576000 | -1.108000 | 0.367000  |
| H | -0.329000 | -1.710000 | 1.251000  |
| C | -1.327000 | 0.123000  | 0.875000  |
| H | -0.746000 | 0.607000  | 1.666000  |
| H | -2.242000 | -0.237000 | 1.354000  |
| C | -1.689000 | 1.166000  | -0.180000 |
| H | -2.648000 | 1.619000  | 0.084000  |
| H | -1.851000 | 0.677000  | -1.145000 |
| C | -0.667000 | 2.279000  | -0.339000 |
| H | 0.300000  | 1.905000  | -0.675000 |
| H | -1.005000 | 3.023000  | -1.063000 |
| H | -0.507000 | 2.792000  | 0.614000  |
| C | -1.461000 | -1.957000 | -0.530000 |
| H | -2.398000 | -2.216000 | -0.033000 |
| H | -1.708000 | -1.430000 | -1.455000 |
| H | -0.956000 | -2.884000 | -0.809000 |

Total Energy: -315.601363110

*n*-octane 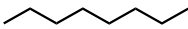

|   |           |           |           |
|---|-----------|-----------|-----------|
| C | -3.361000 | 2.907000  | 0.000000  |
| H | -3.016000 | 3.454000  | 0.881000  |
| H | -3.016000 | 3.454000  | -0.881000 |
| H | -4.452000 | 2.927000  | 0.000000  |
| C | -2.824000 | 1.489000  | 0.000000  |
| H | -3.201000 | 0.949000  | -0.875000 |
| H | -3.201000 | 0.950000  | 0.876000  |
| C | -1.309000 | 1.437000  | 0.000000  |
| H | -0.928000 | 1.976000  | -0.876000 |
| H | -0.928000 | 1.976000  | 0.875000  |
| C | -0.757000 | 0.026000  | 0.000000  |
| H | -1.138000 | -0.513000 | -0.875000 |
| H | -1.138000 | -0.513000 | 0.876000  |
| C | 0.757000  | -0.026000 | -0.000000 |
| H | 1.138000  | 0.513000  | -0.876000 |
| H | 1.138000  | 0.513000  | 0.875000  |
| C | 1.309000  | -1.437000 | -0.000000 |
| H | 0.928000  | -1.976000 | -0.875000 |
| H | 0.928000  | -1.976000 | 0.876000  |
| C | 2.824000  | -1.489000 | -0.000000 |
| H | 3.201000  | -0.950000 | -0.876000 |
| H | 3.201000  | -0.949000 | 0.875000  |
| C | 3.361000  | -2.907000 | -0.000000 |
| H | 3.016000  | -3.454000 | -0.881000 |
| H | 4.452000  | -2.927000 | -0.000000 |
| H | 3.016000  | -3.454000 | 0.881000  |

Total Energy: -315.603915580

1g

|   |           |           |           |
|---|-----------|-----------|-----------|
| C | -3.661000 | 1.035000  | -0.300000 |
| H | -2.951000 | 1.822000  | -0.044000 |
| H | -3.667000 | 0.935000  | -1.389000 |
| H | -4.652000 | 1.372000  | 0.010000  |
| C | -3.296000 | -0.283000 | 0.358000  |
| H | -4.083000 | -1.016000 | 0.157000  |
| H | -3.267000 | -0.155000 | 1.445000  |
| C | -1.964000 | -0.844000 | -0.112000 |
| H | -1.814000 | -1.835000 | 0.329000  |
| H | -1.998000 | -0.994000 | -1.197000 |
| C | -0.772000 | 0.028000  | 0.232000  |
| H | -0.767000 | 0.224000  | 1.311000  |
| H | -0.869000 | 1.004000  | -0.254000 |
| C | 0.550000  | -0.593000 | -0.172000 |
| H | 0.659000  | -1.566000 | 0.321000  |
| H | 0.539000  | -0.799000 | -1.248000 |
| C | 1.746000  | 0.275000  | 0.161000  |
| H | 1.756000  | 0.483000  | 1.237000  |
| H | 1.638000  | 1.248000  | -0.334000 |
| C | 3.069000  | -0.346000 | -0.241000 |
| H | 3.174000  | -1.317000 | 0.254000  |
| H | 3.056000  | -0.553000 | -1.316000 |
| C | 4.256000  | 0.535000  | 0.098000  |
| H | 4.301000  | 0.731000  | 1.172000  |
| H | 5.200000  | 0.074000  | -0.198000 |
| H | 4.182000  | 1.500000  | -0.409000 |

Total Energy: -315.603161050

1g2g

|   |           |           |           |
|---|-----------|-----------|-----------|
| C | -2.914000 | 1.321000  | -0.468000 |
| H | -1.946000 | 1.611000  | -0.883000 |
| H | -3.519000 | 0.928000  | -1.289000 |
| H | -3.398000 | 2.227000  | -0.098000 |
| C | -2.758000 | 0.289000  | 0.632000  |
| H | -3.732000 | 0.099000  | 1.094000  |
| H | -2.122000 | 0.692000  | 1.425000  |
| C | -2.187000 | -1.032000 | 0.139000  |
| H | -2.098000 | -1.720000 | 0.986000  |
| H | -2.901000 | -1.488000 | -0.556000 |
| C | -0.836000 | -0.916000 | -0.546000 |
| H | -0.934000 | -0.333000 | -1.467000 |
| H | -0.508000 | -1.913000 | -0.857000 |
| C | 0.240000  | -0.293000 | 0.322000  |
| H | -0.039000 | 0.734000  | 0.581000  |
| H | 0.302000  | -0.838000 | 1.271000  |
| C | 1.601000  | -0.281000 | -0.342000 |
| H | 1.534000  | 0.254000  | -1.297000 |
| H | 1.893000  | -1.308000 | -0.592000 |
| C | 2.680000  | 0.354000  | 0.512000  |
| H | 2.386000  | 1.380000  | 0.757000  |
| H | 2.743000  | -0.180000 | 1.466000  |
| C | 4.037000  | 0.357000  | -0.166000 |
| H | 4.000000  | 0.910000  | -1.108000 |
| H | 4.802000  | 0.818000  | 0.462000  |
| H | 4.360000  | -0.662000 | -0.395000 |

Total Energy: -315.602986650



1g2g3g

|   |           |           |           |
|---|-----------|-----------|-----------|
| C | 3.045000  | -0.819000 | -0.703000 |
| H | 2.608000  | -0.295000 | -1.555000 |
| H | 3.931000  | -0.258000 | -0.390000 |
| H | 3.376000  | -1.799000 | -1.053000 |
| C | 2.055000  | -0.945000 | 0.439000  |
| H | 2.493000  | -1.556000 | 1.234000  |
| H | 1.169000  | -1.487000 | 0.096000  |
| C | 1.640000  | 0.395000  | 1.024000  |
| H | 0.949000  | 0.224000  | 1.855000  |
| H | 2.521000  | 0.882000  | 1.456000  |
| C | 1.001000  | 1.343000  | 0.019000  |
| H | 1.752000  | 1.662000  | -0.709000 |
| H | 0.685000  | 2.250000  | 0.545000  |
| C | -0.191000 | 0.757000  | -0.719000 |
| H | -0.579000 | 1.505000  | -1.418000 |
| H | 0.132000  | -0.089000 | -1.334000 |
| C | -1.314000 | 0.305000  | 0.193000  |
| H | -1.611000 | 1.137000  | 0.844000  |
| H | -0.958000 | -0.487000 | 0.859000  |
| C | -2.526000 | -0.198000 | -0.566000 |
| H | -2.892000 | 0.596000  | -1.226000 |
| H | -2.220000 | -1.020000 | -1.222000 |
| C | -3.641000 | -0.660000 | 0.351000  |
| H | -3.977000 | 0.156000  | 0.997000  |
| H | -4.506000 | -1.019000 | -0.211000 |
| H | -3.301000 | -1.473000 | 0.998000  |

Total Energy: -315.602845355

1g2g3g4g

|   |           |           |           |
|---|-----------|-----------|-----------|
| C | 3.300000  | -0.012000 | -0.404000 |
| H | 3.012000  | 1.030000  | -0.555000 |
| H | 3.873000  | -0.065000 | 0.526000  |
| H | 3.965000  | -0.292000 | -1.223000 |
| C | 2.087000  | -0.921000 | -0.343000 |
| H | 2.414000  | -1.963000 | -0.290000 |
| H | 1.516000  | -0.830000 | -1.272000 |
| C | 1.180000  | -0.632000 | 0.843000  |
| H | 0.347000  | -1.341000 | 0.837000  |
| H | 1.735000  | -0.821000 | 1.768000  |
| C | 0.635000  | 0.787000  | 0.881000  |
| H | 1.456000  | 1.491000  | 1.045000  |
| H | -0.022000 | 0.890000  | 1.749000  |
| C | -0.116000 | 1.195000  | -0.377000 |
| H | -0.509000 | 2.208000  | -0.241000 |
| H | 0.584000  | 1.252000  | -1.216000 |
| C | -1.260000 | 0.267000  | -0.749000 |
| H | -0.870000 | -0.728000 | -0.988000 |
| H | -1.732000 | 0.632000  | -1.668000 |
| C | -2.319000 | 0.136000  | 0.328000  |
| H | -1.874000 | -0.287000 | 1.233000  |
| H | -2.678000 | 1.134000  | 0.603000  |
| C | -3.484000 | -0.728000 | -0.113000 |
| H | -3.145000 | -1.735000 | -0.371000 |
| H | -4.240000 | -0.821000 | 0.670000  |
| H | -3.969000 | -0.308000 | -0.998000 |

Total Energy: -315.602593435

1g2g3g4g5g

|   |           |           |           |
|---|-----------|-----------|-----------|
| C | -3.241000 | -0.433000 | -0.282000 |
| H | -2.731000 | -1.331000 | -0.637000 |
| H | -3.711000 | -0.678000 | 0.675000  |
| H | -4.035000 | -0.202000 | -0.995000 |
| C | -2.279000 | 0.729000  | -0.130000 |
| H | -2.838000 | 1.632000  | 0.132000  |
| H | -1.803000 | 0.937000  | -1.092000 |
| C | -1.213000 | 0.491000  | 0.928000  |
| H | -0.577000 | 1.378000  | 0.999000  |
| H | -1.698000 | 0.386000  | 1.904000  |
| C | -0.347000 | -0.734000 | 0.676000  |
| H | -0.957000 | -1.637000 | 0.761000  |
| H | 0.401000  | -0.805000 | 1.471000  |
| C | 0.347000  | -0.734000 | -0.676000 |
| H | 0.957000  | -1.637000 | -0.761000 |
| H | -0.401000 | -0.805000 | -1.471000 |
| C | 1.213000  | 0.491000  | -0.928000 |
| H | 0.577000  | 1.378000  | -0.999000 |
| H | 1.698000  | 0.386000  | -1.904000 |
| C | 2.279000  | 0.729000  | 0.130000  |
| H | 2.838000  | 1.632000  | -0.132000 |
| H | 1.803000  | 0.937000  | 1.092000  |
| C | 3.241000  | -0.433000 | 0.282000  |
| H | 3.711000  | -0.678000 | -0.675000 |
| H | 4.035000  | -0.202000 | 0.995000  |
| H | 2.731000  | -1.331000 | 0.637000  |

Total Energy: -315.602309615

1g2g3g5g

|   |           |           |           |
|---|-----------|-----------|-----------|
| C | -2.685000 | 1.221000  | -0.489000 |
| H | -2.123000 | 1.075000  | -1.414000 |
| H | -3.641000 | 0.701000  | -0.600000 |
| H | -2.894000 | 2.288000  | -0.395000 |
| C | -1.922000 | 0.698000  | 0.712000  |
| H | -2.468000 | 0.945000  | 1.627000  |
| H | -0.960000 | 1.214000  | 0.787000  |
| C | -1.692000 | -0.804000 | 0.670000  |
| H | -1.159000 | -1.110000 | 1.575000  |
| H | -2.661000 | -1.313000 | 0.701000  |
| C | -0.928000 | -1.284000 | -0.556000 |
| H | -1.548000 | -1.148000 | -1.447000 |
| H | -0.757000 | -2.361000 | -0.465000 |
| C | 0.405000  | -0.586000 | -0.767000 |
| H | 0.879000  | -0.982000 | -1.671000 |
| H | 0.232000  | 0.477000  | -0.958000 |
| C | 1.362000  | -0.747000 | 0.399000  |
| H | 1.458000  | -1.813000 | 0.631000  |
| H | 0.937000  | -0.276000 | 1.292000  |
| C | 2.739000  | -0.158000 | 0.142000  |
| H | 3.397000  | -0.406000 | 0.980000  |
| H | 3.174000  | -0.635000 | -0.743000 |
| C | 2.720000  | 1.348000  | -0.049000 |
| H | 2.260000  | 1.840000  | 0.813000  |
| H | 3.729000  | 1.748000  | -0.163000 |
| H | 2.150000  | 1.633000  | -0.935000 |

Total Energy: -315.602260214

1g2g4g

|   |           |           |           |
|---|-----------|-----------|-----------|
| C | 2.538000  | 1.549000  | -0.043000 |
| H | 1.484000  | 1.830000  | -0.099000 |
| H | 2.873000  | 1.731000  | 0.982000  |
| H | 3.093000  | 2.219000  | -0.702000 |
| C | 2.746000  | 0.097000  | -0.429000 |
| H | 3.818000  | -0.121000 | -0.464000 |
| H | 2.371000  | -0.070000 | -1.443000 |
| C | 2.081000  | -0.880000 | 0.529000  |
| H | 2.266000  | -1.902000 | 0.182000  |
| H | 2.559000  | -0.794000 | 1.510000  |
| C | 0.583000  | -0.676000 | 0.688000  |
| H | 0.395000  | 0.298000  | 1.147000  |
| H | 0.194000  | -1.421000 | 1.390000  |
| C | -0.182000 | -0.786000 | -0.617000 |
| H | 0.119000  | 0.023000  | -1.291000 |
| H | 0.101000  | -1.719000 | -1.115000 |
| C | -1.690000 | -0.743000 | -0.444000 |
| H | -2.004000 | -1.560000 | 0.218000  |
| H | -2.173000 | -0.930000 | -1.409000 |
| C | -2.207000 | 0.571000  | 0.111000  |
| H | -1.788000 | 0.743000  | 1.106000  |
| H | -1.845000 | 1.391000  | -0.519000 |
| C | -3.721000 | 0.610000  | 0.187000  |
| H | -4.099000 | -0.191000 | 0.828000  |
| H | -4.083000 | 1.558000  | 0.589000  |
| H | -4.165000 | 0.474000  | -0.803000 |

Total Energy: -315.602407126

1g2g5g

|   |           |           |           |
|---|-----------|-----------|-----------|
| C | 2.933000  | 1.179000  | 0.396000  |
| H | 2.074000  | 1.436000  | 1.020000  |
| H | 3.651000  | 0.649000  | 1.028000  |
| H | 3.396000  | 2.113000  | 0.073000  |
| C | 2.522000  | 0.326000  | -0.789000 |
| H | 3.384000  | 0.175000  | -1.445000 |
| H | 1.779000  | 0.862000  | -1.386000 |
| C | 1.971000  | -1.034000 | -0.387000 |
| H | 1.695000  | -1.587000 | -1.291000 |
| H | 2.767000  | -1.610000 | 0.097000  |
| C | 0.769000  | -0.974000 | 0.541000  |
| H | 1.061000  | -0.539000 | 1.502000  |
| H | 0.441000  | -1.995000 | 0.763000  |
| C | -0.402000 | -0.194000 | -0.023000 |
| H | -0.117000 | 0.854000  | -0.169000 |
| H | -0.646000 | -0.584000 | -1.016000 |
| C | -1.623000 | -0.249000 | 0.875000  |
| H | -1.332000 | 0.066000  | 1.883000  |
| H | -1.957000 | -1.289000 | 0.964000  |
| C | -2.781000 | 0.610000  | 0.396000  |
| H | -3.579000 | 0.585000  | 1.144000  |
| H | -2.451000 | 1.653000  | 0.335000  |
| C | -3.340000 | 0.175000  | -0.946000 |
| H | -3.649000 | -0.874000 | -0.915000 |
| H | -4.210000 | 0.771000  | -1.227000 |
| H | -2.600000 | 0.278000  | -1.741000 |

Total Energy: -315.602280460

1g3g

|   |           |           |           |
|---|-----------|-----------|-----------|
| C | -3.443000 | -0.882000 | -0.639000 |
| H | -3.159000 | -0.361000 | -1.555000 |
| H | -2.970000 | -1.868000 | -0.658000 |
| H | -4.524000 | -1.030000 | -0.666000 |
| C | -3.021000 | -0.108000 | 0.597000  |
| H | -3.410000 | -0.611000 | 1.488000  |
| H | -3.481000 | 0.886000  | 0.581000  |
| C | -1.515000 | 0.042000  | 0.728000  |
| H | -1.281000 | 0.531000  | 1.679000  |
| H | -1.062000 | -0.954000 | 0.774000  |
| C | -0.884000 | 0.841000  | -0.398000 |
| H | -1.438000 | 1.780000  | -0.514000 |
| H | -0.995000 | 0.301000  | -1.344000 |
| C | 0.586000  | 1.149000  | -0.175000 |
| H | 0.944000  | 1.803000  | -0.977000 |
| H | 0.700000  | 1.716000  | 0.756000  |
| C | 1.469000  | -0.082000 | -0.119000 |
| H | 1.310000  | -0.683000 | -1.023000 |
| H | 1.175000  | -0.716000 | 0.723000  |
| C | 2.943000  | 0.253000  | 0.006000  |
| H | 3.243000  | 0.878000  | -0.841000 |
| H | 3.096000  | 0.863000  | 0.903000  |
| C | 3.820000  | -0.982000 | 0.070000  |
| H | 3.698000  | -1.592000 | -0.829000 |
| H | 4.877000  | -0.724000 | 0.159000  |
| H | 3.554000  | -1.605000 | 0.928000  |

Total Energy: -315.602513169

1g4g

|   |           |           |           |
|---|-----------|-----------|-----------|
| C | -3.341000 | -1.099000 | 0.554000  |
| H | -2.496000 | -1.746000 | 0.795000  |
| H | -3.594000 | -0.535000 | 1.456000  |
| H | -4.191000 | -1.741000 | 0.313000  |
| C | -3.016000 | -0.160000 | -0.593000 |
| H | -3.915000 | 0.400000  | -0.867000 |
| H | -2.737000 | -0.744000 | -1.477000 |
| C | -1.900000 | 0.820000  | -0.273000 |
| H | -1.783000 | 1.519000  | -1.108000 |
| H | -2.187000 | 1.425000  | 0.595000  |
| C | -0.561000 | 0.161000  | 0.001000  |
| H | -0.312000 | -0.497000 | -0.837000 |
| H | -0.633000 | -0.480000 | 0.885000  |
| C | 0.550000  | 1.172000  | 0.216000  |
| H | 0.674000  | 1.768000  | -0.695000 |
| H | 0.240000  | 1.872000  | 0.998000  |
| C | 1.882000  | 0.553000  | 0.597000  |
| H | 1.763000  | -0.025000 | 1.522000  |
| H | 2.599000  | 1.348000  | 0.827000  |
| C | 2.477000  | -0.343000 | -0.474000 |
| H | 1.805000  | -1.183000 | -0.669000 |
| H | 2.544000  | 0.220000  | -1.412000 |
| C | 3.846000  | -0.870000 | -0.090000 |
| H | 3.794000  | -1.450000 | 0.835000  |
| H | 4.264000  | -1.514000 | -0.865000 |
| H | 4.547000  | -0.048000 | 0.077000  |

Total Energy: -315.602478816



1g5g

|   |           |           |           |
|---|-----------|-----------|-----------|
| C | 3.595000  | 0.546000  | 0.823000  |
| H | 3.000000  | 1.458000  | 0.888000  |
| H | 3.460000  | -0.005000 | 1.759000  |
| H | 4.644000  | 0.841000  | 0.758000  |
| C | 3.186000  | -0.305000 | -0.365000 |
| H | 3.868000  | -1.156000 | -0.451000 |
| H | 3.300000  | 0.275000  | -1.287000 |
| C | 1.759000  | -0.820000 | -0.276000 |
| H | 1.568000  | -1.500000 | -1.113000 |
| H | 1.648000  | -1.419000 | 0.636000  |
| C | 0.707000  | 0.272000  | -0.284000 |
| H | 0.853000  | 0.907000  | -1.166000 |
| H | 0.837000  | 0.923000  | 0.585000  |
| C | -0.707000 | -0.272000 | -0.284000 |
| H | -0.853000 | -0.907000 | -1.166000 |
| H | -0.837000 | -0.923000 | 0.585000  |
| C | -1.759000 | 0.820000  | -0.276000 |
| H | -1.568000 | 1.500000  | -1.113000 |
| H | -1.648000 | 1.419000  | 0.636000  |
| C | -3.186000 | 0.305000  | -0.365000 |
| H | -3.868000 | 1.156000  | -0.451000 |
| H | -3.300000 | -0.275000 | -1.287000 |
| C | -3.595000 | -0.546000 | 0.823000  |
| H | -3.460000 | 0.005000  | 1.759000  |
| H | -4.644000 | -0.841000 | 0.758000  |
| H | -3.000000 | -1.458000 | 0.888000  |

Total Energy: -315.602415938

2g

|   |           |           |           |
|---|-----------|-----------|-----------|
| C | 4.067000  | -0.716000 | 0.039000  |
| H | 4.691000  | 0.135000  | -0.246000 |
| H | 4.155000  | -0.840000 | 1.121000  |
| H | 4.480000  | -1.608000 | -0.435000 |
| C | 2.623000  | -0.484000 | -0.361000 |
| H | 2.026000  | -1.362000 | -0.096000 |
| H | 2.550000  | -0.381000 | -1.449000 |
| C | 2.034000  | 0.752000  | 0.293000  |
| H | 2.056000  | 0.627000  | 1.382000  |
| H | 2.683000  | 1.607000  | 0.072000  |
| C | 0.616000  | 1.070000  | -0.148000 |
| H | 0.599000  | 1.212000  | -1.235000 |
| H | 0.308000  | 2.026000  | 0.289000  |
| C | -0.401000 | 0.011000  | 0.232000  |
| H | -0.152000 | -0.938000 | -0.254000 |
| H | -0.342000 | -0.174000 | 1.311000  |
| C | -1.819000 | 0.396000  | -0.136000 |
| H | -1.874000 | 0.593000  | -1.213000 |
| H | -2.079000 | 1.341000  | 0.356000  |
| C | -2.842000 | -0.659000 | 0.232000  |
| H | -2.581000 | -1.601000 | -0.263000 |
| H | -2.783000 | -0.856000 | 1.308000  |
| C | -4.256000 | -0.259000 | -0.140000 |
| H | -4.341000 | -0.084000 | -1.215000 |
| H | -4.981000 | -1.029000 | 0.132000  |
| H | -4.545000 | 0.666000  | 0.367000  |

Total Energy: -315.603193197

2g3g

|   |           |           |           |
|---|-----------|-----------|-----------|
| C | -3.165000 | -1.464000 | 0.047000  |
| H | -4.052000 | -1.012000 | -0.404000 |
| H | -2.714000 | -2.119000 | -0.704000 |
| H | -3.494000 | -2.089000 | 0.880000  |
| C | -2.183000 | -0.399000 | 0.493000  |
| H | -1.321000 | -0.875000 | 0.971000  |
| H | -2.643000 | 0.235000  | 1.258000  |
| C | -1.712000 | 0.469000  | -0.657000 |
| H | -1.203000 | -0.160000 | -1.395000 |
| H | -2.587000 | 0.883000  | -1.170000 |
| C | -0.802000 | 1.610000  | -0.235000 |
| H | -1.370000 | 2.302000  | 0.396000  |
| H | -0.505000 | 2.177000  | -1.124000 |
| C | 0.449000  | 1.174000  | 0.511000  |
| H | 1.043000  | 2.061000  | 0.757000  |
| H | 0.172000  | 0.725000  | 1.470000  |
| C | 1.315000  | 0.200000  | -0.261000 |
| H | 1.546000  | 0.620000  | -1.247000 |
| H | 0.758000  | -0.724000 | -0.450000 |
| C | 2.605000  | -0.142000 | 0.456000  |
| H | 3.171000  | 0.778000  | 0.636000  |
| H | 2.367000  | -0.550000 | 1.445000  |
| C | 3.460000  | -1.129000 | -0.314000 |
| H | 3.728000  | -0.729000 | -1.295000 |
| H | 4.385000  | -1.364000 | 0.216000  |
| H | 2.921000  | -2.066000 | -0.477000 |

Total Energy: -315.603075549

2g3g4g

|   |           |           |           |
|---|-----------|-----------|-----------|
| C | 3.174000  | -1.273000 | -0.132000 |
| H | 3.771000  | -1.139000 | 0.774000  |
| H | 2.589000  | -2.188000 | -0.006000 |
| H | 3.861000  | -1.428000 | -0.966000 |
| C | 2.265000  | -0.082000 | -0.363000 |
| H | 1.704000  | -0.226000 | -1.291000 |
| H | 2.866000  | 0.823000  | -0.508000 |
| C | 1.302000  | 0.140000  | 0.787000  |
| H | 0.673000  | -0.749000 | 0.901000  |
| H | 1.874000  | 0.224000  | 1.717000  |
| C | 0.429000  | 1.373000  | 0.629000  |
| H | 1.067000  | 2.263000  | 0.619000  |
| H | -0.214000 | 1.471000  | 1.508000  |
| C | -0.429000 | 1.373000  | -0.629000 |
| H | -1.067000 | 2.263000  | -0.619000 |
| H | 0.214000  | 1.471000  | -1.508000 |
| C | -1.302000 | 0.140000  | -0.787000 |
| H | -0.673000 | -0.749000 | -0.901000 |
| H | -1.874000 | 0.224000  | -1.717000 |
| C | -2.265000 | -0.082000 | 0.363000  |
| H | -1.704000 | -0.226000 | 1.291000  |
| H | -2.866000 | 0.823000  | 0.508000  |
| C | -3.174000 | -1.273000 | 0.132000  |
| H | -2.589000 | -2.188000 | 0.006000  |
| H | -3.861000 | -1.428000 | 0.966000  |
| H | -3.771000 | -1.139000 | -0.774000 |

Total Energy: -315.602912144

2g3g4g5g

|   |           |           |           |
|---|-----------|-----------|-----------|
| C | -3.484000 | -0.728000 | -0.113000 |
| H | -3.969000 | -0.308000 | -0.998000 |
| H | -3.145000 | -1.735000 | -0.371000 |
| H | -4.240000 | -0.821000 | 0.670000  |
| C | -2.319000 | 0.136000  | 0.328000  |
| H | -1.874000 | -0.287000 | 1.233000  |
| H | -2.678000 | 1.134000  | 0.603000  |
| C | -1.260000 | 0.267000  | -0.749000 |
| H | -0.870000 | -0.728000 | -0.988000 |
| H | -1.732000 | 0.632000  | -1.668000 |
| C | -0.116000 | 1.195000  | -0.377000 |
| H | -0.509000 | 2.208000  | -0.241000 |
| H | 0.584000  | 1.252000  | -1.216000 |
| C | 0.635000  | 0.787000  | 0.881000  |
| H | 1.456000  | 1.491000  | 1.045000  |
| H | -0.022000 | 0.890000  | 1.749000  |
| C | 1.180000  | -0.632000 | 0.843000  |
| H | 0.347000  | -1.341000 | 0.837000  |
| H | 1.735000  | -0.821000 | 1.768000  |
| C | 2.087000  | -0.921000 | -0.343000 |
| H | 2.414000  | -1.963000 | -0.290000 |
| H | 1.516000  | -0.830000 | -1.272000 |
| C | 3.300000  | -0.012000 | -0.404000 |
| H | 3.873000  | -0.065000 | 0.526000  |
| H | 3.965000  | -0.292000 | -1.223000 |
| H | 3.012000  | 1.030000  | -0.555000 |

Total Energy: -315.602593435

2g3g5g

|   |           |           |           |
|---|-----------|-----------|-----------|
| C | -3.107000 | 1.339000  | 0.234000  |
| H | -4.033000 | 0.760000  | 0.279000  |
| H | -2.843000 | 1.615000  | 1.258000  |
| H | -3.314000 | 2.259000  | -0.316000 |
| C | -1.996000 | 0.534000  | -0.411000 |
| H | -1.093000 | 1.148000  | -0.476000 |
| H | -2.268000 | 0.282000  | -1.442000 |
| C | -1.693000 | -0.741000 | 0.350000  |
| H | -1.367000 | -0.484000 | 1.364000  |
| H | -2.620000 | -1.312000 | 0.470000  |
| C | -0.652000 | -1.624000 | -0.319000 |
| H | -1.051000 | -1.982000 | -1.273000 |
| H | -0.487000 | -2.512000 | 0.300000  |
| C | 0.683000  | -0.939000 | -0.566000 |
| H | 1.368000  | -1.652000 | -1.038000 |
| H | 0.548000  | -0.128000 | -1.287000 |
| C | 1.328000  | -0.402000 | 0.697000  |
| H | 1.363000  | -1.202000 | 1.444000  |
| H | 0.700000  | 0.388000  | 1.124000  |
| C | 2.727000  | 0.149000  | 0.478000  |
| H | 3.159000  | 0.423000  | 1.445000  |
| H | 3.364000  | -0.642000 | 0.069000  |
| C | 2.758000  | 1.355000  | -0.443000 |
| H | 2.103000  | 2.146000  | -0.067000 |
| H | 3.766000  | 1.767000  | -0.526000 |
| H | 2.423000  | 1.099000  | -1.450000 |

Total Energy: -315.602470708

2g4g

|   |           |           |           |
|---|-----------|-----------|-----------|
| C | -4.021000 | -0.484000 | -0.187000 |
| H | -4.427000 | -0.452000 | 0.827000  |
| H | -4.348000 | 0.425000  | -0.700000 |
| H | -4.470000 | -1.336000 | -0.701000 |
| C | -2.508000 | -0.575000 | -0.163000 |
| H | -2.130000 | -0.640000 | -1.187000 |
| H | -2.199000 | -1.500000 | 0.337000  |
| C | -1.870000 | 0.606000  | 0.545000  |
| H | -2.132000 | 1.527000  | 0.011000  |
| H | -2.311000 | 0.696000  | 1.544000  |
| C | -0.360000 | 0.508000  | 0.668000  |
| H | -0.107000 | -0.400000 | 1.226000  |
| H | 0.010000  | 1.348000  | 1.266000  |
| C | 0.360000  | 0.508000  | -0.668000 |
| H | 0.107000  | -0.400000 | -1.226000 |
| H | -0.010000 | 1.348000  | -1.266000 |
| C | 1.870000  | 0.606000  | -0.545000 |
| H | 2.132000  | 1.527000  | -0.011000 |
| H | 2.311000  | 0.696000  | -1.544000 |
| C | 2.508000  | -0.575000 | 0.163000  |
| H | 2.130000  | -0.640000 | 1.187000  |
| H | 2.199000  | -1.500000 | -0.337000 |
| C | 4.021000  | -0.484000 | 0.187000  |
| H | 4.348000  | 0.425000  | 0.700000  |
| H | 4.470000  | -1.336000 | 0.701000  |
| H | 4.427000  | -0.452000 | -0.827000 |

Total Energy: -315.602508160

2g5g

|   |           |           |           |
|---|-----------|-----------|-----------|
| C | 3.846000  | -0.870000 | -0.090000 |
| H | 4.547000  | -0.048000 | 0.077000  |
| H | 3.794000  | -1.450000 | 0.835000  |
| H | 4.264000  | -1.514000 | -0.865000 |
| C | 2.477000  | -0.343000 | -0.474000 |
| H | 1.805000  | -1.183000 | -0.669000 |
| H | 2.544000  | 0.220000  | -1.412000 |
| C | 1.882000  | 0.553000  | 0.597000  |
| H | 1.763000  | -0.025000 | 1.522000  |
| H | 2.599000  | 1.348000  | 0.827000  |
| C | 0.550000  | 1.172000  | 0.216000  |
| H | 0.674000  | 1.768000  | -0.695000 |
| H | 0.240000  | 1.872000  | 0.998000  |
| C | -0.561000 | 0.161000  | 0.001000  |
| H | -0.312000 | -0.497000 | -0.837000 |
| H | -0.633000 | -0.480000 | 0.885000  |
| C | -1.900000 | 0.820000  | -0.273000 |
| H | -1.783000 | 1.519000  | -1.108000 |
| H | -2.187000 | 1.425000  | 0.595000  |
| C | -3.016000 | -0.160000 | -0.593000 |
| H | -3.915000 | 0.400000  | -0.867000 |
| H | -2.737000 | -0.744000 | -1.477000 |
| C | -3.341000 | -1.099000 | 0.554000  |
| H | -3.594000 | -0.535000 | 1.456000  |
| H | -4.191000 | -1.741000 | 0.313000  |
| H | -2.496000 | -1.746000 | 0.795000  |

Total Energy: -315.602478816



3g

|   |           |           |           |
|---|-----------|-----------|-----------|
| C | 3.813000  | -1.111000 | -0.176000 |
| H | 3.395000  | -2.048000 | 0.200000  |
| H | 3.832000  | -1.174000 | -1.267000 |
| H | 4.846000  | -1.041000 | 0.172000  |
| C | 2.984000  | 0.073000  | 0.282000  |
| H | 3.434000  | 1.004000  | -0.079000 |
| H | 2.998000  | 0.134000  | 1.376000  |
| C | 1.546000  | -0.001000 | -0.192000 |
| H | 1.528000  | -0.049000 | -1.288000 |
| H | 1.103000  | -0.938000 | 0.161000  |
| C | 0.710000  | 1.176000  | 0.270000  |
| H | 1.211000  | 2.103000  | -0.030000 |
| H | 0.679000  | 1.187000  | 1.366000  |
| C | -0.710000 | 1.176000  | -0.270000 |
| H | -1.211000 | 2.103000  | 0.030000  |
| H | -0.679000 | 1.187000  | -1.366000 |
| C | -1.546000 | -0.001000 | 0.192000  |
| H | -1.528000 | -0.049000 | 1.288000  |
| H | -1.103000 | -0.938000 | -0.161000 |
| C | -2.984000 | 0.073000  | -0.282000 |
| H | -3.434000 | 1.004000  | 0.079000  |
| H | -2.998000 | 0.134000  | -1.376000 |
| C | -3.813000 | -1.111000 | 0.176000  |
| H | -3.832000 | -1.174000 | 1.267000  |
| H | -4.846000 | -1.041000 | -0.172000 |
| H | -3.395000 | -2.048000 | -0.200000 |

Total Energy: -315.603245485

3g4g

|   |           |           |           |
|---|-----------|-----------|-----------|
| C | 3.460000  | -1.129000 | -0.314000 |
| H | 2.921000  | -2.066000 | -0.477000 |
| H | 3.728000  | -0.729000 | -1.295000 |
| H | 4.385000  | -1.364000 | 0.216000  |
| C | 2.605000  | -0.142000 | 0.456000  |
| H | 3.171000  | 0.778000  | 0.636000  |
| H | 2.367000  | -0.550000 | 1.445000  |
| C | 1.315000  | 0.200000  | -0.261000 |
| H | 1.546000  | 0.620000  | -1.247000 |
| H | 0.758000  | -0.724000 | -0.450000 |
| C | 0.449000  | 1.174000  | 0.511000  |
| H | 1.043000  | 2.061000  | 0.757000  |
| H | 0.172000  | 0.725000  | 1.470000  |
| C | -0.802000 | 1.610000  | -0.235000 |
| H | -1.370000 | 2.302000  | 0.396000  |
| H | -0.505000 | 2.177000  | -1.124000 |
| C | -1.712000 | 0.469000  | -0.657000 |
| H | -1.203000 | -0.160000 | -1.395000 |
| H | -2.587000 | 0.883000  | -1.170000 |
| C | -2.183000 | -0.399000 | 0.493000  |
| H | -1.321000 | -0.875000 | 0.971000  |
| H | -2.643000 | 0.235000  | 1.258000  |
| C | -3.165000 | -1.464000 | 0.047000  |
| H | -2.714000 | -2.119000 | -0.704000 |
| H | -3.494000 | -2.089000 | 0.880000  |
| H | -4.052000 | -1.012000 | -0.404000 |

Total Energy: -315.603075549

3g4g5g

|   |           |           |           |
|---|-----------|-----------|-----------|
| C | -3.641000 | -0.660000 | 0.351000  |
| H | -3.301000 | -1.473000 | 0.998000  |
| H | -3.977000 | 0.156000  | 0.997000  |
| H | -4.506000 | -1.019000 | -0.211000 |
| C | -2.526000 | -0.198000 | -0.566000 |
| H | -2.892000 | 0.596000  | -1.226000 |
| H | -2.220000 | -1.020000 | -1.222000 |
| C | -1.314000 | 0.305000  | 0.193000  |
| H | -1.611000 | 1.137000  | 0.844000  |
| H | -0.958000 | -0.487000 | 0.859000  |
| C | -0.191000 | 0.757000  | -0.719000 |
| H | -0.579000 | 1.505000  | -1.418000 |
| H | 0.132000  | -0.089000 | -1.334000 |
| C | 1.001000  | 1.343000  | 0.019000  |
| H | 1.752000  | 1.662000  | -0.709000 |
| H | 0.685000  | 2.250000  | 0.545000  |
| C | 1.640000  | 0.395000  | 1.024000  |
| H | 0.949000  | 0.224000  | 1.855000  |
| H | 2.521000  | 0.882000  | 1.456000  |
| C | 2.055000  | -0.945000 | 0.439000  |
| H | 2.493000  | -1.556000 | 1.234000  |
| H | 1.169000  | -1.487000 | 0.096000  |
| C | 3.045000  | -0.819000 | -0.703000 |
| H | 3.931000  | -0.258000 | -0.390000 |
| H | 3.376000  | -1.799000 | -1.053000 |
| H | 2.608000  | -0.295000 | -1.555000 |

Total Energy: -315.602845355

3g5g

|   |           |           |           |
|---|-----------|-----------|-----------|
| C | 3.820000  | -0.982000 | 0.070000  |
| H | 3.554000  | -1.605000 | 0.928000  |
| H | 3.698000  | -1.592000 | -0.829000 |
| H | 4.877000  | -0.724000 | 0.159000  |
| C | 2.943000  | 0.253000  | 0.006000  |
| H | 3.243000  | 0.878000  | -0.841000 |
| H | 3.096000  | 0.863000  | 0.903000  |
| C | 1.469000  | -0.082000 | -0.119000 |
| H | 1.310000  | -0.683000 | -1.023000 |
| H | 1.175000  | -0.716000 | 0.723000  |
| C | 0.586000  | 1.149000  | -0.175000 |
| H | 0.944000  | 1.803000  | -0.977000 |
| H | 0.700000  | 1.716000  | 0.756000  |
| C | -0.884000 | 0.841000  | -0.398000 |
| H | -1.438000 | 1.780000  | -0.514000 |
| H | -0.995000 | 0.301000  | -1.344000 |
| C | -1.515000 | 0.042000  | 0.728000  |
| H | -1.281000 | 0.531000  | 1.679000  |
| H | -1.062000 | -0.954000 | 0.774000  |
| C | -3.021000 | -0.108000 | 0.597000  |
| H | -3.410000 | -0.611000 | 1.488000  |
| H | -3.481000 | 0.886000  | 0.581000  |
| C | -3.443000 | -0.882000 | -0.639000 |
| H | -2.970000 | -1.868000 | -0.658000 |
| H | -4.524000 | -1.030000 | -0.666000 |
| H | -3.159000 | -0.361000 | -1.555000 |

Total Energy: -315.602513169

## VII. Linear fits of the Repulsive and Attractive terms of the eighteen isomers of octane and the sixteen *gauche*-conformations of *n*-octane

$\Delta\Delta_{\text{trv}}H^\circ_{\text{gauche}}$  is referenced against *trans-n*-octane. The variable *n* is the number of *gauche*-conformations with respect to *n*-octane.  $\Delta\Delta_{\text{trv}}H^\circ_{\text{protobranch}}$  is referenced against *trans-n*-octane. The variable *n* is the number of geminal-alkyl,alkyl-contacts (protobranches) for the eighteen isomers of octane. Their linear fits (from Figure 7.) are provided below.

$$\Delta\Delta_{\text{trv}}H^\circ_{\text{gauche}} = -0.0998n - 0.0331 \quad R^2 = 0.991$$

$$\Delta\Delta_{\text{trv}}H^\circ_{\text{protobranch}} = -0.2840n + 1.6068 \quad R^2 = 0.986$$

$\Delta E^{\text{C-CCSD}}$  is referenced against the singlet and triplet (strong pairs) correlation of *trans-n*-octane. The variable *n* is the number of *gauche*-conformations or protobranch interactions, as specified. Their linear fits (from Figure 8.) are provided below:

$$\Delta E^{\text{C-CCSD}}_{\text{gauche}} = -0.7598n - 0.1617 \quad R^2 = 0.980$$

$$\Delta E^{\text{C-CCSD}}_{\text{protobranch}} = -1.1509n + 6.8763 \quad R^2 = 0.980$$

VIII. Assorted functional performance for the calculation of  $\Delta\Delta_f H^\circ$

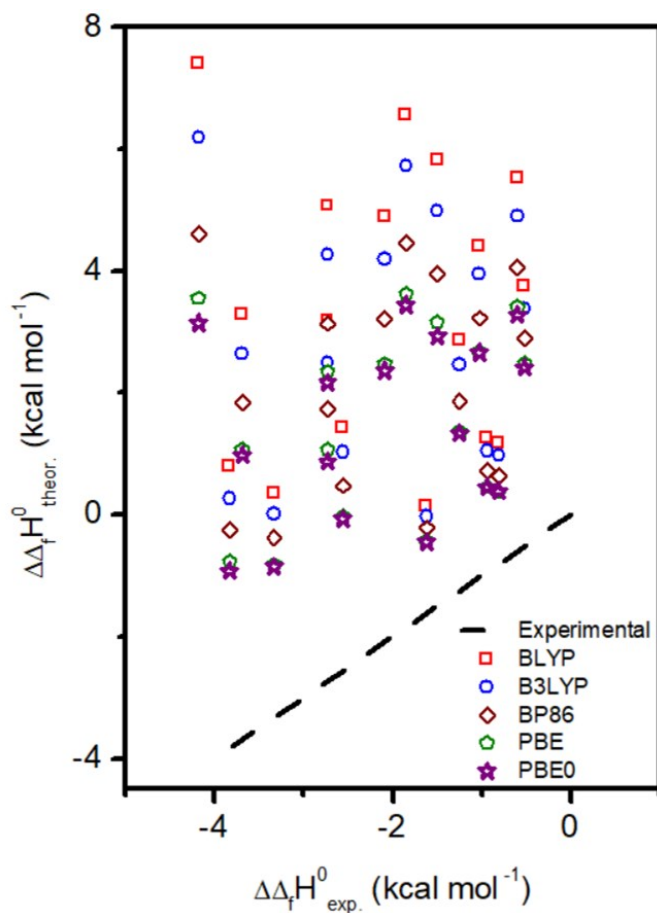

**Figure S9.** The relationship between the calculated and experimental  $\Delta\Delta_f H^\circ$  for the isomers of octane for the following functionals: BLYP (red squares), B3LYP (blue circles), BP86 (brown diamonds), PBE (green pentagon), and PBE0 (purple stars).

$$\text{BLYP: } \Delta\Delta_f H^\circ_{\text{theor.}} = 0.255\Delta\Delta_f H^\circ_{\text{exp.}} + 2.716 \quad (R^2 = 0.018)$$

$$\text{B3LYP: } \Delta\Delta_f H^\circ_{\text{theor.}} = -0.119\Delta\Delta_f H^\circ_{\text{exp.}} + 2.460 \quad (R^2 = 0.005)$$

$$\text{BP86: } \Delta\Delta_f H^\circ_{\text{theor.}} = 0.029\Delta\Delta_f H^\circ_{\text{exp.}} + 2.055 \quad (R^2 = 0.018)$$

$$\text{PBE: } \Delta\Delta_f H^\circ_{\text{theor.}} = 0.154\Delta\Delta_f H^\circ_{\text{exp.}} + 1.742 \quad (R^2 = 0.016)$$

$$\text{PBE0: } \Delta\Delta_f H^\circ_{\text{theor.}} = 0.296\Delta\Delta_f H^\circ_{\text{exp.}} + 1.872 \quad (R^2 = 0.052)$$

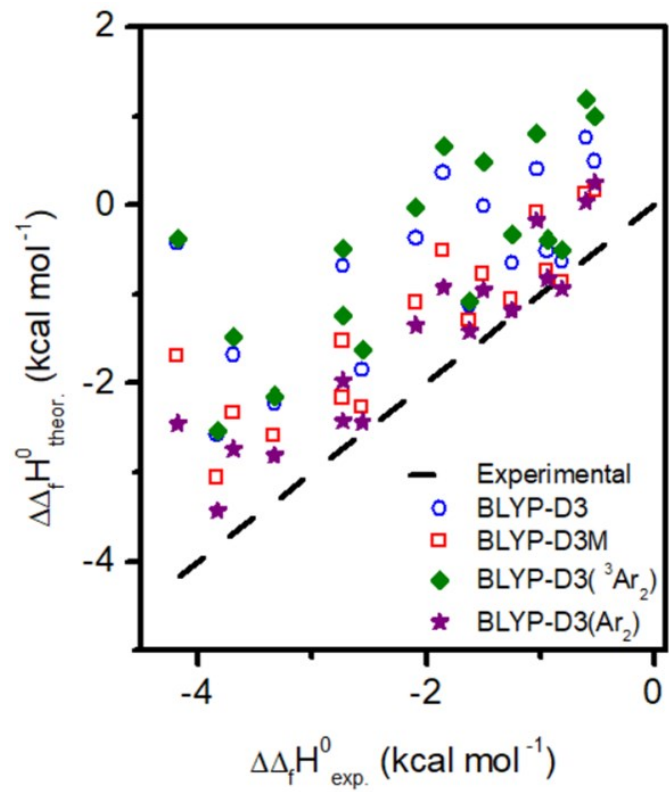

**Figure S10.** The relationship between the calculated and experimental  $\Delta\Delta_f H^{\circ}$  for the isomers of octane for the BLYP functional and the following dispersion corrections: D3 (blue circles), D3M (red squares), D3(<sup>3</sup>Ar<sub>2</sub>) (green diamonds), and D3(Ar<sub>2</sub>) (purple stars).

$$\text{BLYP - D3: } \Delta\Delta_f H^{\circ}_{\text{theor.}} = 0.549\Delta\Delta_f H^{\circ}_{\text{exp.}} + 0.393 \quad (R^2 = 0.499)$$

$$\text{BLYP - D3M: } \Delta\Delta_f H^{\circ}_{\text{theor.}} = 0.690\Delta\Delta_f H^{\circ}_{\text{exp.}} + 0.139 \quad (R^2 = 0.7719)$$

$$\text{BLYP - D3(3Ar}_2\text{): } \Delta\Delta_f H^{\circ}_{\text{theor.}} = 0.596\Delta\Delta_f H^{\circ}_{\text{exp.}} + 0.718 \quad (R^2 = 0.486)$$

$$\text{BLYP - D3(Ar}_2\text{): } \Delta\Delta_f H^{\circ}_{\text{theor.}} = 0.823\Delta\Delta_f H^{\circ}_{\text{exp.}} + 0.183 \quad (R^2 = 0.872)$$

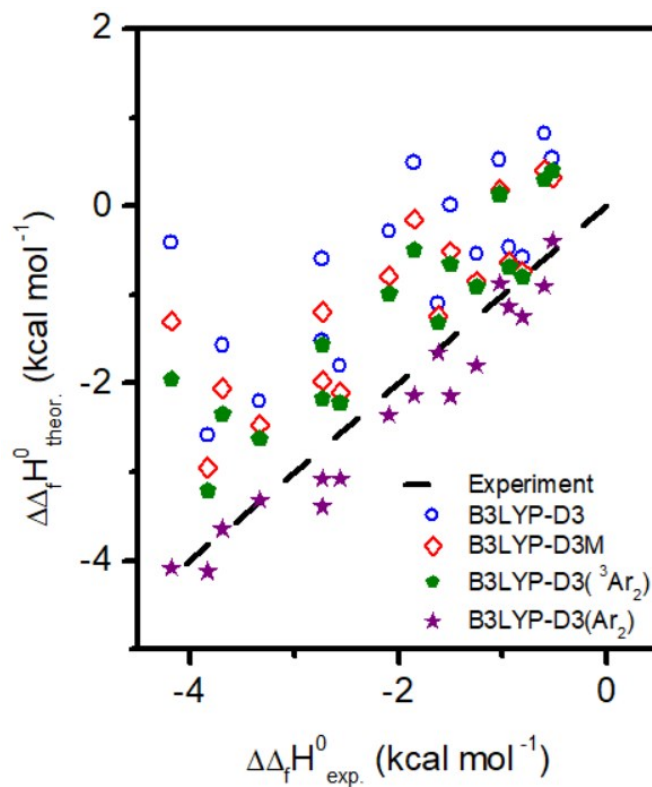

**Figure S11.** The relationship between the calculated and experimental  $\Delta\Delta_f H^\circ$  for the isomers of octane for the B3LYP functional and the following dispersion corrections: D3 (blue circles), D3M (red squares), D3( $^3\text{Ar}_2$ ) (green diamonds), and D3( $\text{Ar}_2$ ) (purple stars).

$$\text{B3LYP - D3: } \Delta\Delta_f H^\circ_{\text{theor.}} = 0.553\Delta\Delta_f H^\circ_{\text{exp.}} + 0.458 \quad (R^2 = 0.492)$$

$$\text{BLYP - D3M: } \Delta\Delta_f H^\circ_{\text{theor.}} = 0.658\Delta\Delta_f H^\circ_{\text{exp.}} + 0.288 \quad (R^2 = 0.691)$$

$$\text{BLYP - D3(3Ar2): } \Delta\Delta_f H^\circ_{\text{theor.}} = 0.764\Delta\Delta_f H^\circ_{\text{exp.}} + 0.325 \quad (R^2 = 0.802)$$

$$\text{BLYP - D3(Ar2): } \Delta\Delta_f H^\circ_{\text{theor.}} = 0.993\Delta\Delta_f H^\circ_{\text{exp.}} - 0.241 \quad (R^2 = 0.956)$$



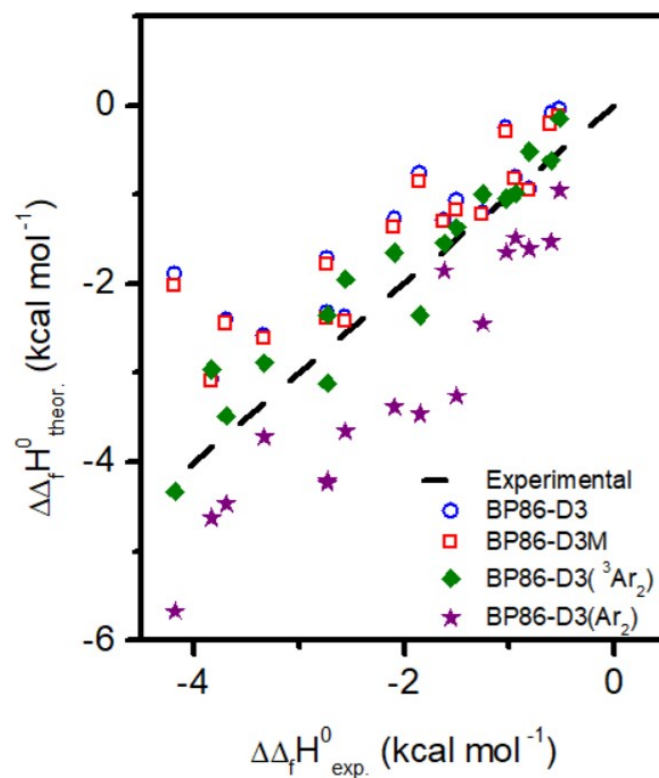

**Figure S12.** The relationship between the calculated and experimental  $\Delta\Delta_f H^\circ$  for the isomers of octane for the BP86 functional and the following dispersion corrections: D3 (blue circles), D3M (red squares), D3( $^3\text{Ar}_2$ ) (green diamonds), and D3( $\text{Ar}_2$ ) (purple stars).

$$\text{BP86 - D3: } \Delta\Delta_f H^\circ_{\text{theor.}} = 0.680\Delta\Delta_f H^\circ_{\text{exp.}} - 0.006 \quad (R^2 = 0.811)$$

$$\text{BP86 - D3M: } \Delta\Delta_f H^\circ_{\text{theor.}} = 0.688\Delta\Delta_f H^\circ_{\text{exp.}} - 0.052 \quad (R^2 = 0.833)$$

$$\text{BP86 - D3(3Ar}_2\text{): } \Delta\Delta_f H^\circ_{\text{theor.}} = 0.937\Delta\Delta_f H^\circ_{\text{exp.}} + 0.042 \quad (R^2 = 0.927)$$

$$\text{BP86 - D3(Ar}_2\text{): } \Delta\Delta_f H^\circ_{\text{theor.}} = 1.148\Delta\Delta_f H^\circ_{\text{exp.}} - 0.652 \quad (R^2 = 0.956)$$

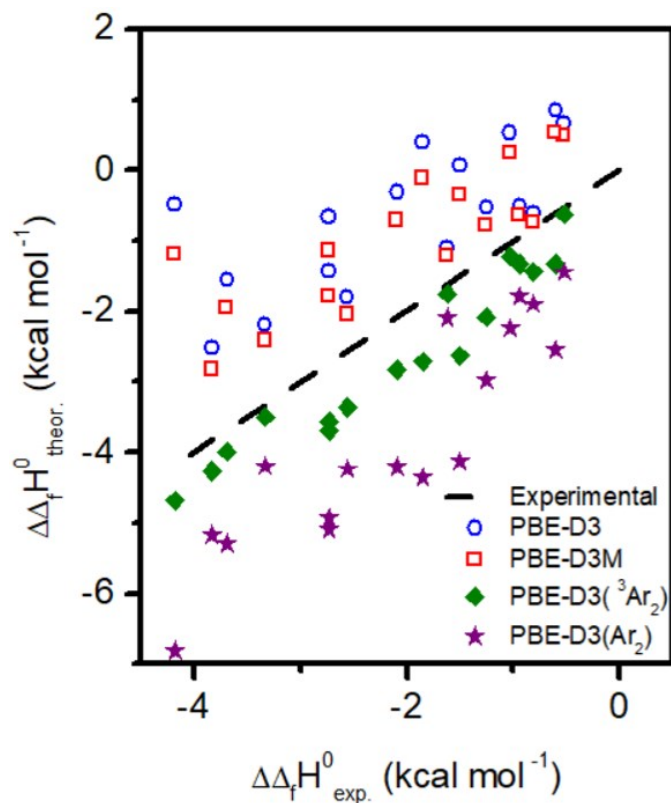

**Figure S13.** The relationship between the calculated and experimental  $\Delta\Delta_f H^{\circ}$  for the isomers of octane for the PBE functional and the following dispersion corrections: D3 (blue circles), D3M (red squares), D3(<sup>3</sup>Ar<sub>2</sub>) (green diamonds), and D3(Ar<sub>2</sub>) (purple stars).

$$\text{PBE - D3: } \Delta\Delta_f H^{\circ}_{\text{theor.}} = 0.559\Delta\Delta_f H^{\circ}_{\text{exp.}} + 0.474 \quad (R^2 = 0.508)$$

$$\text{PBE - D3M: } \Delta\Delta_f H^{\circ}_{\text{theor.}} = 0.645\Delta\Delta_f H^{\circ}_{\text{exp.}} + 0.340 \quad (R^2 = 0.669)$$

$$\text{PBE - D3(3Ar}_2\text{): } \Delta\Delta_f H^{\circ}_{\text{theor.}} = 1.036\Delta\Delta_f H^{\circ}_{\text{exp.}} - 0.468 \quad (R^2 = 0.937)$$

$$\text{PBE - D3(Ar}_2\text{): } \Delta\Delta_f H^{\circ}_{\text{theor.}} = 1.264\Delta\Delta_f H^{\circ}_{\text{exp.}} - 1.047 \quad (R^2 = 0.837)$$

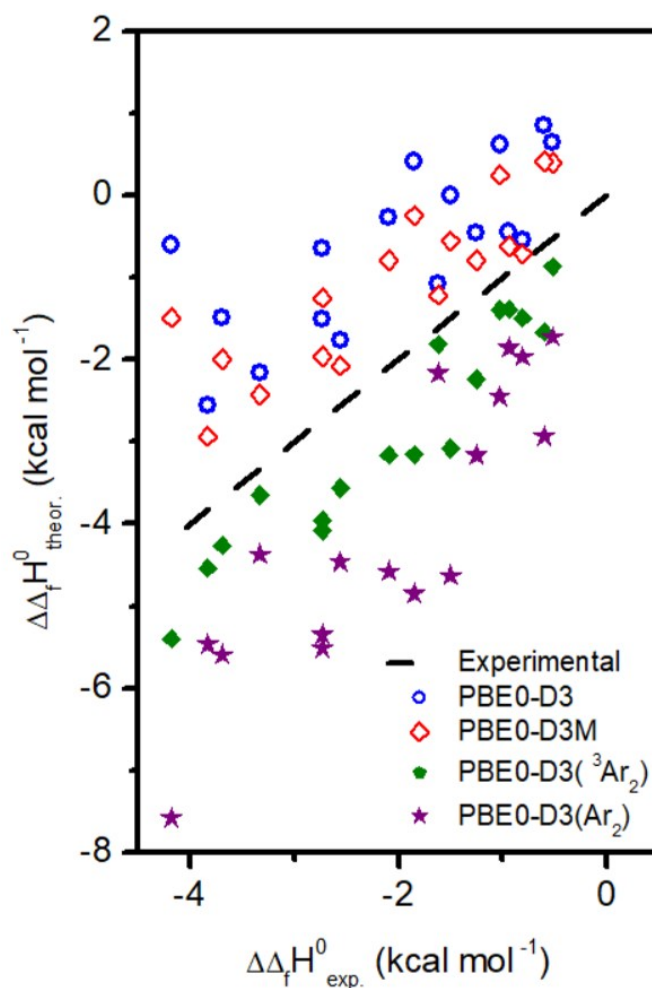

**Figure S14.** The relationship between the calculated and experimental  $\Delta\Delta_f H^0$  for the isomers of octane for the PBE functional and the following dispersion corrections: D3 (blue circles), D3M (red squares), D3(<sup>3</sup>Ar<sub>2</sub>) (green diamonds), and D3(Ar<sub>2</sub>) (purple stars).

$$\text{PBE0 - D3: } \Delta\Delta_f H^0_{\text{theor.}} = 0.575\Delta\Delta_f H^0_{\text{exp.}} + 0.515 \quad (R^2 = 0.536)$$

$$\text{PBE0 - D3M: } \Delta\Delta_f H^0_{\text{theor.}} = 0.677\Delta\Delta_f H^0_{\text{exp.}} + 0.324 \quad (R^2 = 0.729)$$

$$\text{PBE0 - D3(3Ar}_2\text{): } \Delta\Delta_f H^0_{\text{theor.}} = 1.113\Delta\Delta_f H^0_{\text{exp.}} - 0.580 \quad (R^2 = 0.911)$$

$$\text{PBE0 - D3(Ar}_2\text{): } \Delta\Delta_f H^0_{\text{theor.}} = 1.343\Delta\Delta_f H^0_{\text{exp.}} - 1.183 \quad (R^2 = 0.799)$$

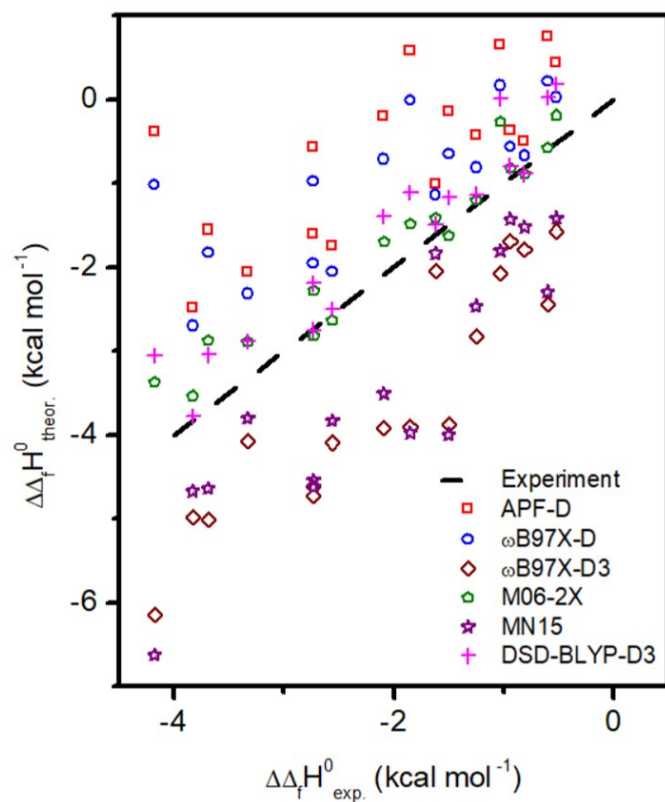

**Figure S15.** The relationship between the calculated and experimental  $\Delta\Delta_f H^\circ$  for the isomers of octane for the following functionals: APF-D (red squares),  $\omega$ B97X-D (blue circles),  $\omega$ B97X-D3 (brown diamonds), M06-2X (green pentagon), MN15 (purple stars), and DSD-BLYP-D3 (pink cross). The slopes and  $R^2$  are provided in the table below:

$$\text{APF - D: } \Delta\Delta_f H^\circ_{\text{theor.}} = 0.540\Delta\Delta_f H^\circ_{\text{exp.}} + 0.464 \quad (R^2 = 0.493)$$

$$\omega\text{B97X - D: } \Delta\Delta_f H^\circ_{\text{theor.}} = 0.566\Delta\Delta_f H^\circ_{\text{exp.}} + 0.164 \quad (R^2 = 0.624)$$

$$\omega\text{B97X - D3: } \Delta\Delta_f H^\circ_{\text{theor.}} = 1.169\Delta\Delta_f H^\circ_{\text{exp.}} - 1.033 \quad (R^2 = 0.856)$$

$$\text{M06 - 2X: } \Delta\Delta_f H^\circ_{\text{theor.}} = 0.877\Delta\Delta_f H^\circ_{\text{exp.}} + 0.019 \quad (R^2 = 0.943)$$

$$\text{MN15: } \Delta\Delta_f H^\circ_{\text{theor.}} = 1.194\Delta\Delta_f H^\circ_{\text{exp.}} - 0.828 \quad (R^2 = 0.819)$$

$$\text{DSD - BLYP - D3: } \Delta\Delta_f H^\circ_{\text{theor.}} = 0.940\Delta\Delta_f H^\circ_{\text{exp.}} + 0.287 \quad (R^2 = 0.912)$$

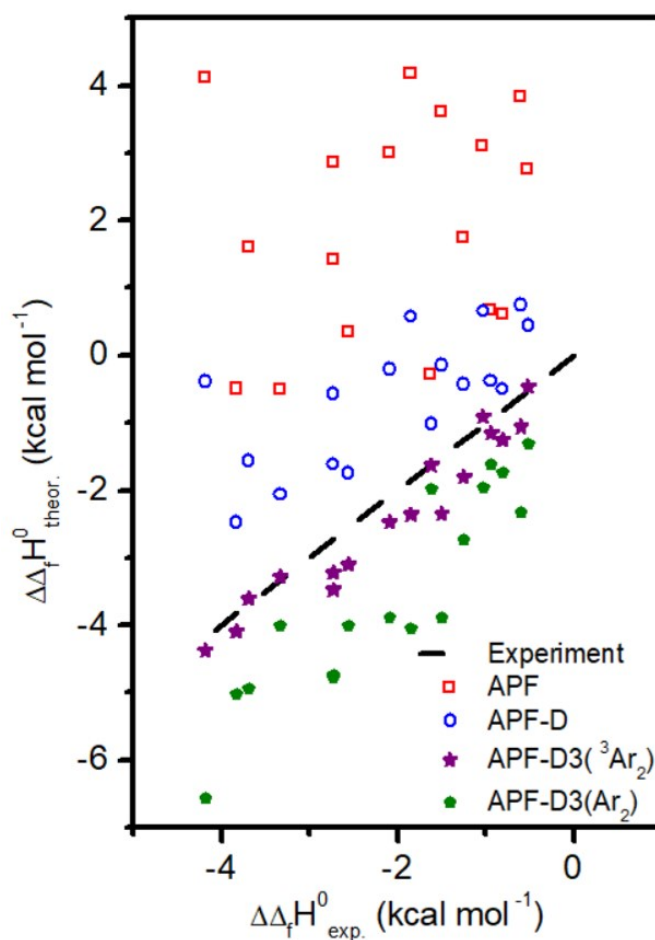

**Figure S16.** The relationship between the calculated and experimental  $\Delta\Delta_f H^{\circ}$  for the isomers of octane for the following functionals: APF (red squares), APF-D (blue circles), APF-D3(<sup>3</sup>Ar<sub>2</sub>) (purple stars), and APF-D3(Ar<sub>2</sub>) (green pentagon).

$$\text{APF: } \Delta\Delta_f H^{\circ}_{\text{theor.}} = 0.095\Delta\Delta_f H^{\circ}_{\text{exp.}} + 1.990 \quad (R^2 = 0.005)$$

$$\text{APF - D: } \Delta\Delta_f H^{\circ}_{\text{theor.}} = 0.540\Delta\Delta_f H^{\circ}_{\text{exp.}} + 0.464 \quad (R^2 = 0.493)$$

$$\text{APF - D3}(3\text{Ar}_2): \Delta\Delta_f H^\circ_{\text{theor.}} = 1.001\Delta\Delta_f H^\circ_{\text{exp.}} + 0.295 \quad (R^2 = 0.946)$$

$$\text{APF - D3}(Ar_2): \Delta\Delta_f H^\circ_{\text{theor.}} = 1.232\Delta\Delta_f H^\circ_{\text{exp.}} - 0.891 \quad (R^2 = 0.850)$$

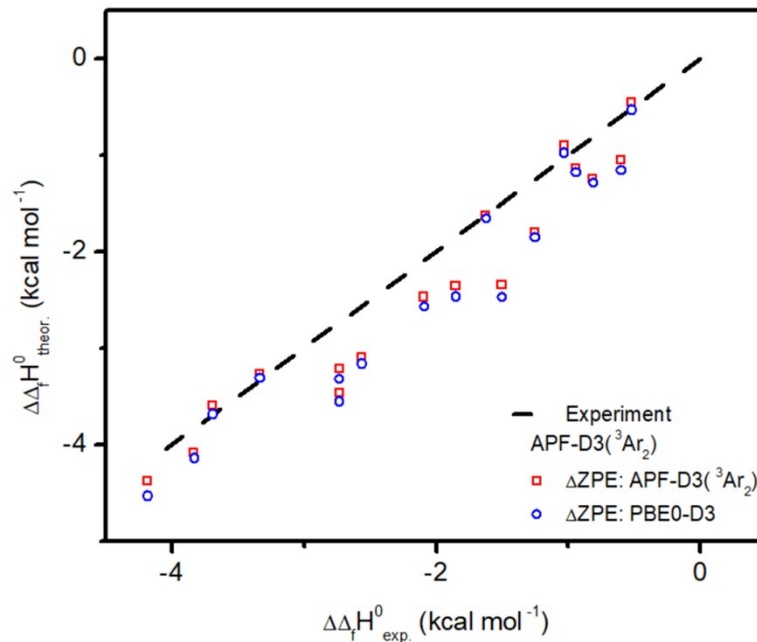

**Figure S17.**  $\Delta\Delta_f H^\circ_{\text{theor.}}$  for the APF-D3( $3\text{Ar}_2$ ) functional is plotted for APF-D3( $3\text{Ar}_2$ ) and PBE0-D3  $\Delta\Delta_{\text{trv}} H^\circ$  thermal corrections. The relationship between the calculated and experimental  $\Delta\Delta_f H^\circ$  for the isomers of octane for the following functionals: APF-D3( $3\text{Ar}_2$ ) (red squares) and PBE0-D3 (blue circles). The  $\Delta\Delta_{\text{trv}} H^\circ$  data from the APF-D3( $3\text{Ar}_2$ ) and PBE0-D3 level of theory are provided in the Table below. Note: the average deviation between the functionals is  $0.0725 \text{ kcal mol}^{-1}$ .

$$\Delta\Delta_{\text{trv}} H^\circ [\text{APF - D3}(3\text{Ar}_2)]: \Delta\Delta_f H^\circ_{\text{theor.}} = 1.001\Delta\Delta_f H^\circ_{\text{exp.}} - 0.2946 \quad (R^2 = 0.946)$$

$$\Delta\Delta_{\text{trv}} H^\circ [\text{PBE0 - D3}]: \Delta\Delta_f H^\circ_{\text{theor.}} = 1.014\Delta\Delta_f H^\circ_{\text{exp.}} - 0.3422 \quad (R^2 = 0.941)$$

| Compound                   | APF-D3( <sup>3</sup> Ar <sub>2</sub> ):<br>$\Delta\Delta_{\text{trv}}H^\circ$ (kcal mol <sup>-1</sup> ) | PBE0-D3:<br>$\Delta\Delta_{\text{trv}}H^\circ$ (kcal mol <sup>-1</sup> ) | $\Delta\Delta_{\text{trv}}H^\circ{}^{\text{PBE0-D3}} - \Delta\Delta_{\text{trv}}H^\circ{}^{\text{APF-D3}(3\text{Ar}_2)}$<br>(kcal mol <sup>-1</sup> ) |
|----------------------------|---------------------------------------------------------------------------------------------------------|--------------------------------------------------------------------------|-------------------------------------------------------------------------------------------------------------------------------------------------------|
| <i>n</i> -octane           | 0                                                                                                       | 0                                                                        | 0                                                                                                                                                     |
| 3-ethyl-hexane             | 0.0351                                                                                                  | -0.03451305                                                              | -0.06965361                                                                                                                                           |
| 3-Ethyl-2-Methyl-Pentane   | -0.1443273                                                                                              | -0.24535641                                                              | -0.10102911                                                                                                                                           |
| 4-Methyl-Heptane           | -0.19076304                                                                                             | -0.22841364                                                              | -0.0376506                                                                                                                                            |
| 3-Methyl-Heptane           | -0.20582328                                                                                             | -0.24096384                                                              | -0.03514056                                                                                                                                           |
| 3,4-Dimethyl-Hexane        | -0.3012048                                                                                              | -0.37525098                                                              | -0.07404618                                                                                                                                           |
| 2,3-Dimethyl-Hexane        | -0.38717367                                                                                             | -0.43486443                                                              | -0.04769076                                                                                                                                           |
| 3-Ethyl-3-Methyl-Pentane   | -0.38717367                                                                                             | -0.51393069                                                              | -0.12675702                                                                                                                                           |
| 2-Methyl-Heptane           | -0.26480922                                                                                             | -0.29304717                                                              | -0.02823795                                                                                                                                           |
| 2,3,3-Trimethyl-Pentane    | -0.67959333                                                                                             | -0.78940758                                                              | -0.10981425                                                                                                                                           |
| 2,3,4-Trimethyl-Pentane    | -0.51581322                                                                                             | -0.61119474                                                              | -0.09538152                                                                                                                                           |
| 2,4-Dimethyl-Hexane        | -0.44866965                                                                                             | -0.51267567                                                              | -0.06400602                                                                                                                                           |
| 2,2,3-Trimethyl-Pentane    | -0.79819272                                                                                             | -0.90110436                                                              | -0.10291164                                                                                                                                           |
| 3,3-Dimethyl-Hexane        | -0.56413149                                                                                             | -0.64696281                                                              | -0.08283132                                                                                                                                           |
| 2,5-Dimethyl-Hexane        | -0.55785639                                                                                             | -0.59299695                                                              | -0.03514056                                                                                                                                           |
| 2,2,4-Trimethyl-Pentane    | -0.93059733                                                                                             | -1.01593869                                                              | -0.08534136                                                                                                                                           |
| 2,2-Dimethyl-Hexane        | -0.71661642                                                                                             | -0.76807224                                                              | -0.05145582                                                                                                                                           |
| 2,2,3,3-Tetramethyl-Butane | -1.16905113                                                                                             | -1.32718365                                                              | -0.15813252                                                                                                                                           |
